# Supplementary material for: The Douglas-Fir Genome Sequence Reveals Specialization of the Photosynthetic Apparatus in Pinaceae
Source: G3 (Bethesda). 2017 Jul 27;7(9):3157–67. doi: 10.1534/g3.117.300078 (PMC5592940; doi:10.1534/g3.117.300078)
Supplement: Supplementary file 3 [file 3157S3.xlsx]

## Sheet: Table S5
Table S5. Rates of gene-family evolution examined across 16 land plants (Species abbreviations and internal nodes (uppercase) as in Figure 3, Bold: Douglas-fir results)
	All							Viterbi P ≤ 0.05
	Genes	Expanded families	Contracted families	Gene duplications	Gene losses	% Changed families		Families	Expanded families	Contracted families	Gene duplications	Gene losses
Athaliana	14326	1047	876	1609	1179	29.7724		108	50	58	597	491
Tcacao	12655	363	1475	586	1827	28.4564		49	19	30	246	646
MALVALES	13896	54	521	69	548	8.90231		13	3	10	39	168
Ppersica	13260	624	1851	1174	2289	38.3186		71	49	22	571	699
Rcommunis	12356	268	1846	379	2352	32.7295		295	40	255	134	896
Mesculenta	17134	2156	220	3056	251	36.7859		331	309	22	1038	100
EUPHORBIACEAE	14329	419	539	560	613	14.832		13	9	4	290	208
Ptrichocarpa	19766	3173	263	5664	280	53.1971		181	180	1	1894	76
MALPIGHIALES	14382	5	0	7	0	0.0774114		3	3	0	7	0
FABIDS	14375	0	0	0	0	0		0	0	0	0	0
ROSIDS	14375	137	170	176	181	4.75306		37	32	5	114	49
Osativa	14158	697	653	976	790	20.9011		83	52	31	411	282
Bdistachyon	13957	573	678	810	825	19.3683		91	44	47	305	368
BEP_CLADE	13972	32	16	36	16	0.743149		15	7	8	17	12
Sbicolor	14523	568	356	775	394	14.3056		77	54	23	310	158
Sitalica	14590	701	400	922	474	17.046		101	67	34	282	190
PANICOIDEAE	14142	277	166	365	175	6.85865		32	29	3	207	75
POACEAE	13952	618	1184	975	1405	27.8991		84	45	39	479	384
Macuminata	19321	2556	595	5748	809	48.7846		267	235	32	2133	328
MONOCOTS	14382	2	0	2	0	0.0309645		1	1	0	2	0
ANGIOSPERMS	14380	503	518	766	577	15.8074		73	59	14	566	108
Pita	11489	592	2223	2784	2594	43.5826		176	153	23	2168	413
Pila	10886	1141	1372	1699	2112	38.907		97	26	71	351	957
PINES	11299	283	1352	615	1459	25.3135		34	29	5	491	296
Pabies	16659	2845	468	5305	789	51.2928		91	78	13	1151	470
PINES+SPRUCES	12143	53	108	63	110	2.49265		0	0	0	60	30
Psme	10396	816	3718	2770	4564	70.1966		108	87	21	1422	866
PINACEAE	12190	529	2296	1184	3185	43.7374		65	59	6	824	690
SEED_PLANTS	14191	68	72	78	80	2.16752		7	1	6	78	28
Ppatens	14579	1745	1285	2501	2115	46.9113		231	27	204	258	1212
ROOT	14193	na	na	na	na	na		na	na	na	na	na

## Sheet: Table S8
Table S8. Summary of gene-family evolution and lineage-specific expansions across land plants (Species abbreviations and internal nodes (uppercase) as in Figure 3)
Description	'ID'	Athaliana	Tcacao	MALVALES	Ppersica	Rcommunis	Mesculenta	EUPHORBIACEAE	Ptrichocarpa	MALPIGHIALES	FABIDS	ROSIDS	Osativa	Bdistachyon	BEP_CLADE	Sbicolor	Sitalica	PANICOIDEAE	POACEAE	Macuminata	MONOCOTS	ANGIOSPERMS	Pita	Pila	PINES	Pabies	PINES+SPRUCES	Psme	PINACEAE	SEED_PLANTS	Ppatens	ROOT	'Family-wide P-value'	Athaliana	Tcacao	MALVALES	Ppersica	Rcommunis	Mesculenta	EUPHORBIACEAE	Ptrichocarpa	MALPIGHIALES	FABIDS	ROSIDS	Osativa	Bdistachyon	BEP_CLADE	Sbicolor	Sitalica
OG0000222	120	6	4	5	3	2	3	3	3	5	5	5	12	19	16	24	21	21	16	10	8	8	5	3	5	5	8	42	10	8	7	8	0.0003	0.337518	0.55685	0.697969	0.248093	0.128423	0.585106	0.208569	0.240163	0.540866	0.510719	0.00092	0.015654	0.103126	0.640731	0.063032	0.848791
OG0000269	152	5	5	6	9	6	7	7	7	7	7	7	6	6	7	7	8	7	7	9	7	7	5	3	6	8	10	49	12	8	9	8	0.001	0.594718	0.594718	0.380748	0.211802	0.257201	0.66686	0.874381	0.884835	0.55579	0.51491	0.66686	0.469541	0.469541	0.570772	0.718304	0.157328
OG0000998	696	2	2	2	2	2	3	2	4	2	2	2	2	2	2	2	2	2	2	6	2	2	1	1	2	3	4	30	5	2	2	2	0.0003	0.729234	0.729234	0.599453	0.765192	0.559421	0.031623	0.739903	0.07543	0.516986	0.50433	0.559421	0.636472	0.636472	0.52195	0.585379	0.585379
OG0001159	817	2	2	3	2	2	2	2	3	3	3	3	4	3	3	5	3	3	3	4	3	3	0	0	0	1	2	28	3	3	3	3	0.0005	0.440855	0.440855	0.637804	0.498896	0.559421	0.559421	0.458252	0.810177	0.525153	0.506474	0.585106	0.118466	0.683116	0.53238	0.011894	0.61971
OG0001658	1181	2	1	2	1	1	2	2	2	2	2	2	1	1	1	1	1	1	1	2	2	2	1	2	2	4	4	27	5	3	3	3	0.0099	0.729234	0.347221	0.599453	0.404097	0.089163	0.559421	0.739903	0.760273	0.516986	0.50433	0.559421	0.576855	0.576855	0.511161	0.545784	0.545784
OG0001894	1344	1	1	1	1	1	1	1	2	1	1	1	1	1	1	1	1	1	1	1	1	1	1	1	2	4	4	28	4	1	1	1	0.0109	0.644064	0.644064	0.554022	0.6758	0.531151	0.531151	0.653052	0.091158	0.508604	0.502172	0.531151	0.576855	0.576855	0.511161	0.545784	0.545784
OG0002005	1421	1	1	1	2	1	1	1	2	1	1	1	1	1	1	1	1	1	1	1	1	1	2	2	2	3	3	24	3	1	1	1	0.0355	0.644064	0.644064	0.554022	0.093689	0.531151	0.531151	0.653052	0.091158	0.508604	0.502172	0.531151	0.576855	0.576855	0.511161	0.545784	0.545784
OG0002318	1648	1	1	1	2	1	1	1	1	1	1	1	1	1	1	1	1	1	1	1	1	1	1	0	1	1	2	26	2	1	1	1	0.0097	0.644064	0.644064	0.554022	0.093689	0.531151	0.531151	0.653052	0.671201	0.508604	0.502172	0.531151	0.576855	0.576855	0.511161	0.545784	0.545784
OG0002364	1685	1	1	1	1	1	2	1	1	1	1	1	1	2	1	2	1	1	1	3	1	1	0	2	2	1	2	21	2	1	1	1	0.0014	0.644064	0.644064	0.554022	0.6758	0.531151	0.01581	0.653052	0.671201	0.508604	0.502172	0.531151	0.576855	0.039773	0.511161	0.02339	0.545784
OG0002361	1682	1	1	1	1	1	2	2	2	2	2	2	2	2	2	3	3	3	2	2	2	2	1	1	1	1	2	17	2	2	1	2	0.0381	0.644064	0.644064	0.149344	0.404097	0.089163	0.559421	0.739903	0.760273	0.516986	0.50433	0.559421	0.636472	0.636472	0.52195	0.61971	0.61971
OG0000378	236	11	6	8	11	7	6	7	8	8	8	8	9	5	7	7	5	7	7	7	8	8	2	9	6	2	7	29	8	8	6	8	0.0001	0.111543	0.298384	0.759424	0.099112	0.66686	0.257201	0.662268	0.893011	0.56297	0.516985	0.683051	0.120649	0.058999	0.570772	0.718304	0.022236
OG0002071	1478	1	1	1	1	1	1	1	2	1	1	1	4	2	2	2	1	2	2	1	1	1	1	0	1	4	4	21	4	2	2	2	0.0052	0.644064	0.644064	0.554022	0.6758	0.531151	0.531151	0.653052	0.091158	0.508604	0.502172	0.531151	0.014969	0.636472	0.52195	0.585379	0.128168
OG0001148	807	4	4	4	4	2	3	3	6	4	4	4	3	2	3	3	3	3	3	2	3	3	1	3	3	3	4	20	4	3	1	3	0.0055	0.815995	0.815995	0.670307	0.844061	0.128423	0.585106	0.524334	0.102955	0.533111	0.508603	0.047362	0.683116	0.279572	0.53238	0.61971	0.61971
OG0000053	12	16	19	18	16	17	26	21	24	18	18	18	18	15	18	19	22	19	18	24	18	18	36	36	30	25	21	2	18	15	7	14	0.0003	0.490934	0.621708	0.851063	0.547119	0.001873	0.000572	0.222133	0.047778	0.625616	0.537013	0.787733	0.881554	0.122788	0.653713	0.839352	0.052431
OG0000927	638	3	2	3	2	2	4	3	4	3	3	3	2	2	2	2	2	2	2	2	3	3	2	7	5	6	7	25	7	4	4	4	0.0124	0.781861	0.440855	0.637804	0.498896	0.128423	0.047362	0.791855	0.267687	0.525153	0.506474	0.585106	0.636472	0.636472	0.52195	0.585379	0.585379
OG0000182	90	8	5	8	7	7	12	9	15	9	9	9	9	9	9	9	9	9	9	26	9	9	3	8	7	10	10	31	11	8	4	8	0.0001	0.878131	0.065054	0.43908	0.389837	0.016885	0.003723	0.890895	0.007047	0.56997	0.519047	0.697872	0.82128	0.82128	0.588139	0.751372	0.751372
OG0001833	1298	1	1	1	2	1	3	2	2	2	2	2	3	3	2	2	1	2	2	3	2	2	1	2	2	2	3	16	3	2	2	2	0.0145	0.644064	0.644064	0.149344	0.765192	0.089163	0.031623	0.739903	0.760273	0.516986	0.50433	0.559421	0.079663	0.079663	0.52195	0.585379	0.128168
OG0000059	17	12	18	18	16	15	25	20	27	19	19	19	18	25	19	15	15	16	19	30	19	19	16	13	16	16	19	44	20	16	8	15	0.0004	0.017395	0.921302	0.602502	0.358766	0.000174	0.000471	0.644962	0.010362	0.631064	0.538945	0.794349	0.671329	0.002984	0.659904	0.530209	0.530209
OG0002900	2056	1	1	1	1	1	1	1	2	1	1	1	3	3	2	2	1	2	2	4	2	2	0	2	2	1	2	13	2	2	1	2	0.0301	0.644064	0.644064	0.554022	0.6758	0.531151	0.531151	0.653052	0.091158	0.508604	0.502172	0.089163	0.079663	0.079663	0.52195	0.585379	0.128168
OG0004618	3210	0	0	0	0	1	0	1	1	1	1	1	1	0	1	0	0	0	1	2	1	1	0	1	1	5	3	15	3	1	1	1	0.0026	0.5	0.5	0.080261	0.254217	0.531151	0.046475	0.653052	0.671201	0.508604	0.502172	0.531151	0.576855	0.11368	0.511161	0.5	0.5
OG0001111	775	2	3	3	3	3	2	3	1	3	3	3	2	0	2	3	3	3	2	4	3	3	2	2	3	5	5	19	5	4	5	4	0.0138	0.440855	0.781861	0.637804	0.814454	0.585106	0.128423	0.791855	0.138381	0.525153	0.506474	0.585106	0.636472	0.004844	0.52195	0.61971	0.61971
OG0000246	136	3	5	5	7	5	8	6	8	6	6	6	4	4	4	4	4	4	4	12	6	6	22	14	17	13	16	38	16	6	3	6	0.0003	0.192783	0.839273	0.345833	0.442944	0.228721	0.020741	0.862635	0.171901	0.548424	0.512822	0.649148	0.719948	0.719948	0.542465	0.649559	0.649559
OG0001419	1004	3	2	2	2	2	4	2	3	2	2	2	2	2	2	3	3	3	2	1	2	2	0	5	3	4	4	17	4	2	2	2	0.006	0.154062	0.729234	0.599453	0.765192	0.559421	0.00244	0.739903	0.185667	0.516986	0.50433	0.559421	0.636472	0.636472	0.52195	0.61971	0.61971
OG0000068	24	11	10	13	10	12	20	15	22	14	14	14	19	19	18	18	21	19	18	15	14	14	54	48	39	18	22	4	19	13	7	12	0.001	0.415832	0.206117	0.539501	0.147486	0.005584	0.000144	0.589189	0.00566	0.602425	0.529157	0.755654	0.467942	0.467942	0.653713	0.566995	0.109807
OG0000620	421	5	6	5	5	5	8	6	9	5	5	5	5	4	4	4	2	4	4	5	5	5	2	4	4	4	5	18	5	4	1	4	0.0003	0.839273	0.337518	0.697969	0.863415	0.228721	0.020741	0.355305	0.017585	0.540866	0.510719	0.629747	0.155479	0.719948	0.542465	0.649559	0.007369
OG0001533	1087	2	1	2	1	1	2	2	2	2	2	2	4	4	4	3	4	4	4	6	3	3	0	1	1	2	3	14	3	3	2	3	0.0202	0.729234	0.347221	0.599453	0.404097	0.089163	0.559421	0.739903	0.760273	0.516986	0.50433	0.128423	0.719948	0.719948	0.542465	0.228313	0.649559
OG0000169	82	8	10	8	5	3	8	6	13	7	7	7	11	7	7	7	5	7	7	3	7	7	45	8	22	15	20	42	20	7	1	6	0.0004	0.878131	0.186141	0.183856	0.328372	0.000368	0.020741	0.638702	0.005492	0.55579	0.51491	0.66686	0.002949	0.792239	0.570772	0.718304	0.022236
OG0000317	189	10	6	8	7	6	11	8	10	8	8	8	7	7	7	7	5	7	7	15	8	8	3	8	6	3	7	23	8	7	5	7	0.0001	0.186141	0.298384	0.759424	0.691827	0.013512	0.002721	0.883526	0.234222	0.56297	0.516985	0.683051	0.792239	0.792239	0.570772	0.718304	0.022236
OG0000219	118	0	4	4	4	6	3	5	3	5	5	5	15	12	13	12	15	13	13	10	9	9	15	12	14	8	14	34	15	11	16	12	0.0002	0.000725	0.815995	0.306179	0.608768	0.078376	0.005286	0.846908	0.240163	0.540866	0.510719	7.4e-05	0.139185	0.603333	0.619639	0.483512	0.063995
OG0000974	676	2	2	3	2	2	11	4	2	3	3	3	3	4	3	3	3	3	3	7	3	3	2	4	4	3	5	17	5	4	6	4	0	0.440855	0.440855	0.637804	0.498896	0.003285	0	0.238877	0.491041	0.525153	0.506474	0.585106	0.683116	0.118466	0.53238	0.61971	0.61971
OG0000506	336	1	5	5	6	6	7	6	6	5	5	5	22	7	10	9	12	10	10	0	5	5	2	4	3	2	4	15	4	4	1	4	0.0001	0.001964	0.839273	0.697969	0.398322	0.649148	0.093557	0.355305	0.389852	0.540866	0.510719	0.629747	0	0.022111	0.596403	0.422639	0.090659
OG0000925	636	3	3	3	3	3	5	4	12	3	3	3	3	3	3	3	3	3	3	4	3	3	0	4	3	2	4	15	4	3	1	3	0.0002	0.781861	0.781861	0.637804	0.814454	0.16458	0.062964	0.238877	4e-06	0.525153	0.506474	0.585106	0.683116	0.683116	0.53238	0.61971	0.61971
OG0001152	810	6	2	3	2	2	4	3	3	3	3	3	2	2	2	2	2	2	2	8	3	3	2	1	2	2	3	15	4	4	6	4	0.0155	0.015338	0.440855	0.637804	0.498896	0.128423	0.047362	0.791855	0.810177	0.525153	0.506474	0.585106	0.636472	0.636472	0.52195	0.585379	0.585379
OG0000615	417	5	5	5	5	5	7	6	8	5	5	5	5	4	5	6	4	5	5	10	5	5	1	1	1	3	3	13	3	4	2	4	0.0082	0.839273	0.839273	0.697969	0.863415	0.228721	0.093557	0.355305	0.073135	0.540866	0.510719	0.629747	0.749318	0.391267	0.552217	0.114925	0.270185
OG0000067	23	2	7	8	8	31	25	26	26	14	12	12	29	17	23	41	28	29	23	4	12	12	28	12	19	14	19	39	19	10	1	9	0.0003	0.000371	0.649056	0.001937	0.118802	0.001313	0.547979	2.9e-05	7.8e-05	0.006846	0.525152	0.735383	0.005962	0.003131	0.682821	0	0.647893
OG0001222	859	3	1	2	1	1	2	2	2	2	2	2	1	1	1	1	1	1	1	3	2	2	7	10	8	4	7	20	7	2	1	2	0.0203	0.154062	0.347221	0.599453	0.404097	0.089163	0.559421	0.739903	0.760273	0.516986	0.50433	0.559421	0.576855	0.576855	0.511161	0.545784	0.545784
OG0001016	707	3	2	3	2	2	6	3	3	3	3	3	3	3	3	3	3	3	3	3	3	3	2	3	3	4	5	18	6	5	8	5	0.0222	0.781861	0.440855	0.637804	0.498896	0.128423	0.000176	0.791855	0.810177	0.525153	0.506474	0.585106	0.683116	0.683116	0.53238	0.61971	0.61971
OG0001283	906	2	2	2	2	2	3	2	4	2	2	2	2	2	2	2	2	2	2	2	2	2	2	10	5	4	5	16	5	2	1	2	0.0335	0.729234	0.729234	0.599453	0.765192	0.559421	0.031623	0.739903	0.07543	0.516986	0.50433	0.559421	0.636472	0.636472	0.52195	0.585379	0.585379
OG0000585	393	2	2	3	7	1	1	1	4	4	4	4	5	6	5	2	4	4	5	1	4	4	15	3	8	3	8	23	9	8	18	9	0.0001	0.440855	0.440855	0.260933	0.050557	0.531151	0.531151	0.016587	0.840469	0.533111	0.508603	0.60847	0.749318	0.190333	0.552217	0.007369	0.649559
OG0000038	5	16	18	22	34	15	27	22	39	25	25	25	32	32	32	37	34	34	32	25	25	25	20	31	26	23	27	50	28	20	6	18	0.001	0.030294	0.186854	0.065601	0.012706	2e-06	0.000688	0.380421	0.000289	0.661096	0.550282	0.825638	0.913379	0.913379	0.72523	0.081713	0.885773
OG0000921	634	6	3	4	3	4	7	5	2	4	4	4	6	5	6	7	7	7	6	6	4	4	1	1	1	3	3	12	3	3	2	3	0.0065	0.076569	0.5075	0.670307	0.562934	0.197925	0.01491	0.302254	0.192007	0.533111	0.508603	0.60847	0.772977	0.433673	0.561649	0.718304	0.718304
OG0001558	1108	2	3	3	1	3	4	3	4	3	3	3	4	4	4	2	6	4	4	3	3	3	2	0	2	2	3	12	3	3	2	3	0.0052	0.440855	0.781861	0.637804	0.144205	0.585106	0.047362	0.791855	0.267687	0.525153	0.506474	0.585106	0.719948	0.719948	0.542465	0.007369	0.020376
OG0000521	346	0	8	5	8	3	16	7	6	5	5	5	1	2	1	0	0	0	1	0	3	3	10	17	12	7	10	24	10	3	1	3	0.0001	9.1e-05	0.048206	0.697969	0.077854	2.5e-05	0	0.114986	0.389852	0.540866	0.510719	0.005608	0.576855	0.039773	0.511161	0.5	0.5
OG0000244	135	6	4	6	3	4	6	5	5	6	6	6	9	11	11	12	13	12	11	21	9	9	1	15	9	9	11	27	12	9	8	9	0.0001	0.855941	0.231646	0.721613	0.061447	0.197925	0.078376	0.609631	0.63684	0.548424	0.512822	0.001316	0.203077	0.841801	0.604401	0.788184	0.250074
OG0000065	22	17	13	18	28	19	29	23	20	20	20	20	13	13	14	13	12	13	14	18	20	20	21	18	21	15	23	44	24	23	29	24	0.0004	0.767045	0.044268	0.248974	0.013746	0.002546	9.9e-05	0.246673	0.933888	0.636379	0.540865	0.800503	0.617546	0.617546	0.626896	0.797918	0.483512
OG0000348	213	8	4	7	11	9	10	9	9	8	8	8	10	14	10	7	11	10	10	5	8	8	6	6	6	1	6	17	6	6	2	6	0	0.418741	0.050244	0.411633	0.099112	0.697872	0.137407	0.468625	0.502237	0.56297	0.516985	0.683051	0.832372	0.008597	0.596403	0.005437	0.215292
OG0000567	378	6	2	4	2	3	2	3	3	4	4	4	7	10	7	4	6	6	7	5	4	4	7	13	9	2	8	21	8	4	2	4	0.0001	0.076569	0.15032	0.670307	0.199136	0.585106	0.128423	0.524334	0.555548	0.533111	0.508603	0.60847	0.792239	0.021046	0.570772	0.016633	0.698343
OG0001085	755	0	6	3	5	4	4	4	5	3	3	3	3	3	3	3	5	3	3	2	3	3	7	2	5	3	5	15	5	3	1	3	0.0004	0.006189	0.015338	0.637804	0.072605	0.60847	0.60847	0.238877	0.069258	0.525153	0.506474	0.585106	0.683116	0.683116	0.53238	0.61971	0.011894
OG0000136	56	9	11	11	8	10	12	11	21	12	12	12	8	9	9	8	8	8	9	21	12	12	34	6	16	27	15	3	14	12	11	12	0.0002	0.37562	0.897842	0.505343	0.118802	0.351899	0.165034	0.724994	0.000896	0.589932	0.525152	0.735383	0.526577	0.82128	0.588139	0.735868	0.735868
OG0000701	481	4	5	5	5	3	7	5	6	5	5	5	6	5	6	6	6	6	6	8	5	5	1	2	2	2	3	11	3	4	1	4	0.0043	0.55685	0.839273	0.697969	0.863415	0.005286	0.01491	0.846908	0.389852	0.540866	0.510719	0.629747	0.772977	0.433673	0.561649	0.698343	0.698343
OG0000408	261	2	2	3	3	3	7	4	5	4	4	4	6	4	4	3	5	4	4	5	4	4	19	12	14	9	12	25	12	5	5	5	0.0002	0.440855	0.440855	0.260933	0.562934	0.16458	0.000395	0.824778	0.335112	0.533111	0.508603	0.60847	0.052645	0.719948	0.542465	0.228313	0.092721
OG0000707	484	12	2	4	5	3	6	4	2	4	4	4	6	6	5	4	4	4	5	5	4	4	3	2	3	1	3	10	3	3	1	3	0.0001	1.2e-05	0.15032	0.670307	0.343296	0.16458	0.009819	0.824778	0.192007	0.533111	0.508603	0.60847	0.190333	0.190333	0.552217	0.649559	0.649559
OG0004182	2911	0	0	0	1	0	0	0	2	1	1	1	0	2	1	0	0	0	1	0	1	1	0	5	3	4	3	10	3	1	1	1	0.0045	0.5	0.5	0.080261	0.6758	0.5	0.5	0.222606	0.091158	0.508604	0.502172	0.531151	0.11368	0.039773	0.511161	0.5	0.5
OG0000755	518	7	2	2	3	2	1	2	2	2	2	2	1	2	1	1	1	1	1	1	2	2	1	10	6	12	8	18	8	3	3	3	0.0002	0.000207	0.729234	0.599453	0.191135	0.559421	0.089163	0.739903	0.760273	0.516986	0.50433	0.559421	0.576855	0.039773	0.511161	0.545784	0.545784
OG0000309	182	8	9	8	7	8	7	8	11	8	8	8	7	6	7	8	7	7	7	12	8	8	17	4	9	3	9	20	9	7	4	7	0.0014	0.878131	0.45067	0.759424	0.691827	0.683051	0.283578	0.883526	0.093912	0.56297	0.516985	0.683051	0.792239	0.469541	0.570772	0.157328	0.718304
OG0000145	64	14	10	10	5	7	7	7	11	9	9	9	10	10	9	8	7	8	9	10	9	9	18	23	20	23	20	35	20	9	3	8	0.0003	0.053687	0.892395	0.228104	0.04452	0.66686	0.66686	0.345506	0.261919	0.56997	0.519047	0.697872	0.306911	0.306911	0.588139	0.735868	0.371066
OG0001424	1007	1	1	1	1	2	2	2	2	2	2	2	7	4	5	6	5	5	5	3	2	2	1	6	4	3	4	11	4	2	1	2	0.0145	0.644064	0.644064	0.149344	0.404097	0.559421	0.559421	0.739903	0.760273	0.516986	0.50433	0.559421	0.074833	0.391267	0.552217	0.114925	0.675585
OG0001628	1158	1	5	3	3	1	2	2	6	3	3	3	1	2	2	1	3	2	2	2	3	3	5	3	4	3	4	11	4	3	2	3	0.005	0.048657	0.102994	0.637804	0.814454	0.089163	0.559421	0.458252	0.024996	0.525153	0.506474	0.585106	0.20519	0.636472	0.52195	0.128168	0.046794
OG0000401	256	1	24	8	16	2	6	5	16	8	8	8	0	0	0	0	4	1	1	2	4	4	41	0	10	11	7	0	6	4	2	4	0.0003	1.1e-05	0	0.759424	0.00064	0.000198	0.078376	0.124848	0.00054	0.56297	0.516985	1.6e-05	0.5	0.5	0.01671	0.068126	5.1e-05
OG0000163	76	12	7	10	10	6	12	9	10	10	10	10	10	11	11	12	14	12	11	13	10	10	23	15	17	24	14	3	12	8	1	7	0.0001	0.234875	0.151553	0.78782	0.906996	0.001316	0.003723	0.698371	0.905135	0.576793	0.521095	0.711456	0.569679	0.841801	0.604401	0.788184	0.116332
OG0000725	498	3	7	4	7	4	3	4	5	4	4	4	1	1	1	1	1	1	1	1	3	3	8	9	9	9	9	19	9	3	3	3	0.0126	0.5075	0.029965	0.670307	0.050557	0.60847	0.16458	0.824778	0.335112	0.533111	0.508603	0.047362	0.576855	0.576855	0.511161	0.545784	0.545784
OG0000255	142	3	5	5	4	4	4	4	7	5	5	5	10	13	11	13	15	13	11	3	5	5	45	13	19	13	12	2	10	5	1	5	0.0004	0.192783	0.839273	0.697969	0.608768	0.60847	0.60847	0.572743	0.137814	0.540866	0.510719	0.629747	0.569679	0.112379	0.604401	0.797918	0.063995
OG0000030	4	28	24	29	30	21	50	34	44	31	31	31	32	26	30	27	37	31	30	56	31	31	35	16	23	30	22	9	21	23	7	20	0.001	0.816808	0.146507	0.352824	0.844891	0	0	0.352715	0.001545	0.687092	0.561191	0.846994	0.319691	0.066766	0.716765	0.020284	0.002205
OG0001130	790	3	2	3	3	3	6	4	6	3	3	3	4	3	3	3	3	3	3	6	3	3	2	6	3	1	3	9	3	3	2	3	0.0214	0.781861	0.440855	0.637804	0.814454	0.16458	0.009819	0.238877	0.024996	0.525153	0.506474	0.585106	0.118466	0.683116	0.53238	0.61971	0.61971
OG0000274	157	7	4	5	8	3	4	4	7	5	5	5	4	3	5	8	9	8	5	3	5	5	46	10	19	5	14	26	14	5	5	5	0.0004	0.10414	0.55685	0.697969	0.077854	0.16458	0.60847	0.572743	0.137814	0.540866	0.510719	0.629747	0.391267	0.033179	0.552217	0.735868	0.177424
OG0000101	40	15	8	11	10	8	15	11	15	11	11	11	3	3	3	3	3	3	3	11	11	11	51	15	29	23	27	43	27	15	21	16	0.001	0.065065	0.170484	0.799389	0.737985	0.00237	0.000529	0.902157	0.097799	0.583445	0.52313	0.723924	0.683116	0.683116	0.53238	0.61971	0.61971
OG0000404	258	8	6	7	7	6	9	7	12	7	7	7	7	6	7	7	6	7	7	6	7	7	1	5	4	7	6	14	6	6	5	6	0.0371	0.418741	0.624692	0.741913	0.887207	0.257201	0.027188	0.874381	0.011256	0.55579	0.51491	0.66686	0.792239	0.469541	0.570772	0.718304	0.341012
OG0000416	267	6	6	7	5	5	9	7	12	7	7	7	4	3	4	7	4	4	4	17	7	7	3	4	4	5	6	14	6	6	5	6	0	0.624692	0.624692	0.741913	0.328372	0.010433	0.027188	0.874381	0.011256	0.55579	0.51491	0.66686	0.719948	0.340635	0.542465	0.001211	0.649559
OG0000184	91	10	8	10	8	9	13	11	18	11	11	11	10	10	11	12	15	12	11	17	11	11	3	1	4	13	9	20	10	9	4	8	0.0001	0.892395	0.352445	0.485554	0.227133	0.024399	0.057179	0.902157	0.007413	0.583445	0.52313	0.723924	0.569679	0.569679	0.604401	0.788184	0.02022
OG0000202	106	13	12	12	13	14	11	12	34	12	12	12	5	6	6	6	7	6	6	8	10	10	2	6	5	2	6	15	7	10	10	10	0.0002	0.542074	0.902524	0.809565	0.595044	0.065343	0.371586	0.906602	0	0.589932	0.525152	0.049215	0.433673	0.772977	0.561649	0.698343	0.136482
OG0000873	597	4	2	3	2	3	4	3	3	3	3	3	3	2	3	3	4	3	3	4	3	3	17	3	8	4	7	15	7	3	2	3	0.0021	0.224621	0.440855	0.637804	0.498896	0.585106	0.047362	0.791855	0.810177	0.525153	0.506474	0.585106	0.683116	0.279572	0.53238	0.61971	0.069966
OG0000078	29	14	9	13	8	8	12	11	17	14	14	14	21	18	20	24	20	21	20	30	16	15	26	13	19	16	19	32	19	12	2	10	0.0001	0.558796	0.056091	0.539501	0.017973	0.00237	0.165034	0.240608	0.198614	0.602425	0.529157	0.423158	0.491756	0.340663	0.665903	0.063032	0.587443
OG0000199	103	8	10	8	10	4	6	6	8	8	8	8	7	7	7	7	7	7	7	6	8	8	35	15	20	8	16	28	16	8	5	8	0.0003	0.878131	0.186141	0.759424	0.242324	0.00768	0.649148	0.316852	0.893011	0.56297	0.516985	0.683051	0.792239	0.792239	0.570772	0.718304	0.718304
OG0001002	700	3	2	3	2	2	4	3	3	3	3	3	3	5	3	3	3	3	3	6	3	3	3	5	5	9	6	13	6	3	2	3	0.0381	0.781861	0.440855	0.637804	0.498896	0.128423	0.047362	0.791855	0.810177	0.525153	0.506474	0.585106	0.683116	0.032188	0.53238	0.61971	0.61971
OG0000382	240	5	3	5	4	4	3	4	5	5	5	5	6	5	5	6	5	5	5	6	5	5	23	5	13	14	13	23	13	5	3	5	0.0006	0.839273	0.192783	0.697969	0.608768	0.60847	0.16458	0.572743	0.860362	0.540866	0.510719	0.629747	0.190333	0.749318	0.552217	0.114925	0.675585
OG0000166	79	15	8	10	6	6	10	9	12	10	10	10	12	11	11	16	9	11	11	22	10	10	9	17	11	10	8	1	7	8	2	7	0.0001	0.016287	0.352445	0.78782	0.055827	0.001316	0.137407	0.698371	0.287356	0.576793	0.521095	0.711456	0.352802	0.841801	0.604401	0.000221	0.049021
OG0000210	112	5	7	7	6	6	8	7	9	8	8	8	17	9	15	25	22	21	15	15	9	9	11	12	10	8	7	1	7	7	4	7	0.0001	0.266775	0.868419	0.411633	0.36108	0.257201	0.108472	0.662268	0.502237	0.56297	0.516985	0.308042	0.165194	0.000509	0.633924	0.014198	0.373034
OG0000194	99	10	6	8	5	7	8	8	11	8	8	8	8	12	8	9	5	8	8	7	8	8	30	16	18	16	13	4	12	9	9	9	0.0002	0.186141	0.298384	0.759424	0.158518	0.283578	0.683051	0.883526	0.093912	0.56297	0.516985	0.683051	0.808091	0.004444	0.579599	0.177424	0.002902
OG0000153	69	6	14	10	14	11	9	10	12	10	10	10	7	5	8	11	9	9	8	5	9	9	47	17	24	20	17	6	15	9	6	9	0.0005	0.031242	0.053687	0.78782	0.088186	0.151389	0.330764	0.896996	0.287356	0.576793	0.521095	0.137407	0.500173	0.012858	0.579599	0.077868	0.751372
OG0000162	75	2	3	4	6	6	4	5	5	6	6	6	42	28	25	23	13	20	22	8	7	7	12	20	14	4	11	20	11	6	1	5	0.0003	0.15032	0.5075	0.023083	0.877033	0.078376	0.197925	0.609631	0.63684	0.548424	0.512822	0.257201	0	0.12161	0.00253	0.057683	1.7e-05
OG0001593	1129	4	2	3	2	2	11	4	4	3	3	3	3	3	3	2	3	3	3	4	3	3	1	1	1	1	2	6	2	2	1	2	0	0.224621	0.440855	0.637804	0.498896	0.003285	0	0.238877	0.267687	0.525153	0.506474	0.585106	0.683116	0.683116	0.53238	0.181245	0.61971
OG0000062	20	20	16	19	16	13	28	20	20	19	19	19	29	26	24	19	21	21	23	26	19	19	26	11	17	9	16	28	17	15	4	13	0.0001	0.63137	0.294855	0.855808	0.358766	1e-06	0	0.644962	0.669702	0.631064	0.538945	0.794349	0.023412	0.266503	0.124495	0.220283	0.848791
OG0001230	867	4	3	4	4	3	5	4	6	4	4	4	5	3	4	3	4	4	4	10	4	4	0	0	0	0	0	4	1	3	2	3	0.0461	0.815995	0.5075	0.670307	0.844061	0.16458	0.062964	0.824778	0.102955	0.533111	0.508603	0.60847	0.155479	0.340635	0.542465	0.228313	0.649559
OG0000233	128	8	4	6	14	6	5	6	6	6	6	6	6	9	6	4	5	5	6	6	6	6	43	20	22	9	12	3	10	6	5	6	0.0004	0.132156	0.231646	0.721613	0.000273	0.649148	0.228721	0.862635	0.874374	0.548424	0.512822	0.649148	0.772977	0.014693	0.561649	0.270185	0.675585
OG0000833	571	2	1	2	1	1	2	2	8	3	3	3	2	2	2	2	5	2	2	5	3	3	8	8	8	10	9	17	9	4	4	4	0.0006	0.729234	0.347221	0.209068	0.144205	0.089163	0.559421	0.458252	0.001262	0.525153	0.506474	0.585106	0.636472	0.636472	0.52195	0.585379	0.000191
OG0000076	27	18	14	17	13	12	23	18	25	18	18	18	17	23	19	19	20	19	19	25	18	18	26	12	16	14	14	5	13	17	15	17	0.0001	0.611251	0.268112	0.591866	0.107184	9e-06	0.000307	0.924496	0.020908	0.625616	0.537013	0.787733	0.328282	0.043619	0.659904	0.839352	0.349864
OG0000303	178	6	6	7	5	7	9	8	7	8	8	8	14	12	13	15	14	14	13	22	10	9	2	1	2	4	4	9	4	7	4	7	0.0001	0.624692	0.624692	0.411633	0.158518	0.283578	0.123096	0.883526	0.686241	0.56297	0.516985	0.308042	0.392004	0.603333	0.619639	0.281894	0.806658
OG0000598	402	5	5	6	5	3	6	5	9	6	6	6	5	6	6	5	6	6	6	10	6	6	1	2	2	3	4	9	4	5	3	5	0.0311	0.594718	0.594718	0.721613	0.643204	0.005286	0.078376	0.609631	0.100455	0.548424	0.512822	0.649148	0.433673	0.772977	0.561649	0.307554	0.698343
OG0000890	609	4	3	4	3	3	7	4	6	4	4	4	3	2	3	5	3	3	3	7	4	4	1	2	2	7	4	9	4	4	3	4	0.0029	0.815995	0.5075	0.670307	0.562934	0.16458	0.000395	0.824778	0.102955	0.533111	0.508603	0.60847	0.683116	0.279572	0.53238	0.011894	0.61971
OG0001453	1025	3	2	2	1	1	2	2	2	2	2	2	2	1	2	1	2	2	2	3	2	2	0	3	3	7	5	11	5	4	10	5	0.0399	0.154062	0.729234	0.599453	0.404097	0.089163	0.559421	0.739903	0.760273	0.516986	0.50433	0.559421	0.636472	0.20519	0.52195	0.128168	0.585379
OG0001499	1062	8	1	2	1	1	2	2	2	2	2	2	2	1	1	1	1	1	1	3	2	2	3	1	3	9	5	11	5	3	3	3	0.0034	3.7e-05	0.347221	0.599453	0.404097	0.089163	0.559421	0.739903	0.760273	0.516986	0.50433	0.559421	0.039773	0.576855	0.511161	0.545784	0.545784
OG0000110	45	9	8	10	15	16	5	11	23	11	11	11	9	8	10	13	12	12	10	6	10	10	46	20	26	13	20	31	20	9	2	8	0.0004	0.686459	0.352445	0.485554	0.1038	3.9e-05	1e-06	0.902157	2.8e-05	0.583445	0.52313	0.151389	0.54954	0.183677	0.596403	0.250074	0.788184
OG0000411	263	2	2	3	2	3	6	4	9	3	3	3	0	0	1	6	2	2	2	3	3	3	32	6	16	17	15	25	15	3	1	3	0.0001	0.440855	0.440855	0.637804	0.498896	0.16458	0.009819	0.238877	0.000311	0.525153	0.506474	0.585106	0.11368	0.11368	0.032926	1.1e-05	0.585379
OG0000168	81	8	5	9	5	10	18	13	15	10	10	10	14	14	13	12	13	13	13	12	10	10	25	14	15	2	11	19	11	8	2	7	0.0001	0.669307	0.024042	0.463582	0.019315	0.00379	7.9e-05	0.105694	0.029509	0.576793	0.521095	0.711456	0.392004	0.392004	0.619639	0.483512	0.797918
OG0000753	516	6	6	5	3	4	6	5	5	5	5	5	5	3	5	6	6	6	5	12	5	5	1	0	1	3	3	7	3	5	4	5	0.0307	0.337518	0.337518	0.697969	0.248093	0.197925	0.078376	0.846908	0.860362	0.540866	0.510719	0.629747	0.749318	0.033179	0.552217	0.698343	0.698343
OG0001433	1010	2	2	3	2	2	3	3	5	3	3	3	11	6	6	3	4	4	5	3	3	3	2	2	2	2	3	7	3	3	1	3	0.0017	0.440855	0.440855	0.637804	0.498896	0.128423	0.585106	0.791855	0.069258	0.525153	0.506474	0.585106	0.000228	0.772977	0.028023	0.228313	0.649559
OG0002906	2060	1	1	1	1	6	2	2	2	1	1	1	1	1	1	1	2	1	1	1	1	1	4	0	3	3	3	7	3	2	2	2	0.0078	0.644064	0.644064	0.554022	0.6758	2e-06	0.559421	0.081169	0.091158	0.508604	0.502172	0.531151	0.576855	0.576855	0.511161	0.545784	0.02339
OG0000343	209	2	5	5	9	5	5	5	6	5	5	5	7	5	6	8	7	7	6	4	5	5	18	9	13	14	12	20	12	5	4	5	0.0128	0.023978	0.839273	0.697969	0.019216	0.629747	0.629747	0.846908	0.389852	0.540866	0.510719	0.629747	0.222877	0.433673	0.561649	0.157328	0.718304
OG0000196	101	14	7	10	6	7	14	10	13	10	10	10	9	8	9	9	9	9	9	18	10	10	8	5	7	27	9	2	8	9	6	9	0.0001	0.053687	0.151553	0.78782	0.055827	0.001798	0.000379	0.896996	0.130346	0.576793	0.521095	0.711456	0.82128	0.526577	0.588139	0.751372	0.751372
OG0000064	21	6	10	12	20	18	19	18	43	17	16	16	19	20	19	18	20	19	19	6	15	15	41	25	29	16	24	35	24	13	2	11	0.0004	0.002506	0.396657	0.005051	0.125179	0.787733	0.25081	0.62548	0	0.068358	0.53311	0.216128	0.885104	0.48023	0.659904	0.566995	0.349864
OG0000361	221	9	7	8	6	7	13	9	10	8	8	8	5	4	5	4	7	5	5	16	8	8	16	7	9	5	6	1	6	7	4	7	0	0.45067	0.649056	0.759424	0.36108	0.016885	0.000262	0.468625	0.234222	0.56297	0.516985	0.683051	0.749318	0.391267	0.552217	0.270185	0.030285
OG0000390	246	5	5	6	4	4	7	6	8	6	6	6	11	6	6	6	5	6	6	19	6	6	10	10	9	10	7	1	6	5	2	5	0.0001	0.594718	0.594718	0.721613	0.290969	0.00768	0.093557	0.862635	0.171901	0.548424	0.512822	0.649148	0.000228	0.772977	0.561649	0.698343	0.307554
OG0000554	369	4	2	4	2	3	6	4	5	4	4	4	4	1	4	5	6	5	4	5	4	4	36	5	11	7	7	1	6	4	1	4	0.0003	0.815995	0.15032	0.670307	0.199136	0.16458	0.009819	0.824778	0.335112	0.533111	0.508603	0.60847	0.719948	0.00177	0.542465	0.675585	0.114925
OG0000660	453	14	1	3	1	1	1	1	2	3	3	3	2	3	3	2	4	3	3	3	3	3	31	8	12	9	7	1	6	3	2	3	0.0001	0	0.048657	0.637804	0.144205	0.531151	0.531151	0.055491	0.491041	0.525153	0.506474	0.585106	0.279572	0.683116	0.53238	0.181245	0.069966
OG0000270	154	9	7	9	9	7	11	9	11	9	9	9	13	14	12	14	11	12	12	12	9	9	5	6	5	5	4	0	4	7	4	7	0.0043	0.885942	0.326817	0.774602	0.901622	0.016885	0.041513	0.890895	0.261919	0.56997	0.519047	0.697872	0.373163	0.12585	0.612143	0.116332	0.465063
OG0000750	514	4	3	4	6	2	4	4	6	5	5	5	5	4	4	4	4	4	4	9	5	5	3	2	3	16	4	0	4	5	4	5	0.0058	0.815995	0.5075	0.306179	0.398322	0.003285	0.60847	0.572743	0.389852	0.540866	0.510719	0.629747	0.155479	0.719948	0.542465	0.649559	0.649559
OG0000938	647	4	3	4	3	4	6	5	7	4	4	4	2	2	2	2	2	2	2	10	4	4	8	4	5	7	4	0	4	4	4	4	0.0247	0.815995	0.5075	0.670307	0.562934	0.197925	0.078376	0.302254	0.047193	0.533111	0.508603	0.60847	0.636472	0.636472	0.52195	0.585379	0.585379
OG0001506	1069	3	1	2	1	1	2	2	2	2	2	2	5	5	5	7	5	5	5	9	3	3	1	3	2	2	2	5	2	3	2	3	0.0161	0.154062	0.347221	0.599453	0.404097	0.089163	0.559421	0.739903	0.760273	0.516986	0.50433	0.128423	0.749318	0.749318	0.552217	0.030285	0.675585
OG0000057	14	11	18	16	14	27	35	29	29	18	17	17	23	12	15	14	16	15	15	11	15	15	53	13	25	14	21	31	21	13	4	12	0.001	0.033512	0.347704	0.580369	0.331615	0.202353	0.000293	0.000293	0.000664	0.072525	0.535068	0.09054	8.1e-05	0.052342	0.633924	0.515919	0.296755
OG0000089	35	10	17	14	23	13	16	14	15	14	14	14	9	8	9	8	8	8	9	11	13	13	38	11	22	17	21	31	21	15	16	15	0.0003	0.065045	0.151761	0.82655	0.002113	0.407107	0.082066	0.913913	0.617266	0.602425	0.529157	0.191281	0.82128	0.526577	0.588139	0.735868	0.735868
OG0001554	1104	3	4	3	3	2	4	3	5	3	3	3	3	2	3	9	5	5	3	3	3	3	1	1	1	1	1	3	1	2	1	2	0.0068	0.781861	0.224621	0.637804	0.814454	0.128423	0.047362	0.791855	0.069258	0.525153	0.506474	0.585106	0.683116	0.279572	0.53238	0.000147	0.675585
OG0008477	5901	1	0	1	0	3	0	1	1	1	1	1	1	1	1	0	2	1	1	1	1	1	0	1	1	1	1	3	1	1	1	1	0.0187	0.644064	0.209991	0.554022	0.254217	0.0005	0.046475	0.653052	0.671201	0.508604	0.502172	0.531151	0.576855	0.576855	0.511161	0.068126	0.02339
OG0000132	53	11	8	10	9	7	9	8	14	10	10	10	21	11	13	14	11	13	13	15	10	10	39	18	21	12	14	6	13	9	4	8	0.0003	0.502248	0.352445	0.78782	0.724959	0.283578	0.123096	0.371182	0.082759	0.576793	0.521095	0.711456	3.5e-05	0.239264	0.619639	0.266343	0.128974
OG0000256	143	8	8	9	7	6	10	9	12	10	10	10	11	11	10	10	9	10	10	12	10	10	16	2	7	8	7	2	7	11	14	11	0.0013	0.669307	0.669307	0.463582	0.20556	0.001316	0.137407	0.698371	0.287356	0.576793	0.521095	0.711456	0.33077	0.33077	0.596403	0.765103	0.422639
OG0000365	225	7	5	6	5	4	7	6	11	6	6	6	8	9	8	9	9	9	8	5	6	6	19	5	9	12	8	2	7	5	2	5	0.0001	0.38143	0.594718	0.721613	0.643204	0.00768	0.093557	0.862635	0.007273	0.548424	0.512822	0.649148	0.808091	0.281069	0.579599	0.751372	0.751372
OG0000414	265	6	6	7	6	5	7	6	8	7	7	7	4	4	4	5	4	4	4	9	7	7	8	3	6	19	7	2	7	8	14	9	0.0169	0.624692	0.624692	0.741913	0.670117	0.228721	0.093557	0.638702	0.471368	0.55579	0.51491	0.66686	0.719948	0.719948	0.542465	0.092721	0.649559
OG0000539	359	7	4	6	5	6	9	7	7	6	6	6	3	4	4	4	5	4	4	11	6	6	5	3	5	6	6	11	6	5	1	5	0.0014	0.38143	0.231646	0.721613	0.643204	0.257201	0.027188	0.399654	0.434505	0.548424	0.512822	0.649148	0.340635	0.719948	0.542465	0.649559	0.092721
OG0000805	554	5	3	4	9	2	5	4	5	4	4	4	4	3	4	4	3	4	4	5	4	4	4	1	4	10	6	11	6	4	3	4	0.0048	0.285654	0.5075	0.670307	0.004219	0.003285	0.062964	0.824778	0.335112	0.533111	0.508603	0.60847	0.719948	0.340635	0.542465	0.649559	0.228313
OG0000595	399	7	8	6	4	4	7	6	14	6	6	6	2	2	4	7	12	7	5	5	6	6	0	4	3	3	4	8	4	6	5	6	0	0.38143	0.132156	0.721613	0.290969	0.00768	0.093557	0.862635	0.000228	0.548424	0.512822	0.649148	0.021864	0.021864	0.078777	0.718304	3.7e-05
OG0000984	684	5	3	4	3	3	6	4	7	4	4	4	4	2	3	3	2	3	3	5	4	4	5	2	4	5	4	8	4	3	1	3	0.0045	0.285654	0.5075	0.670307	0.562934	0.16458	0.009819	0.824778	0.047193	0.533111	0.508603	0.60847	0.118466	0.279572	0.53238	0.61971	0.181245
OG0000370	230	4	5	5	4	4	8	6	8	6	6	6	7	6	6	6	4	6	6	15	6	6	7	8	8	10	9	15	9	6	4	6	0.0005	0.55685	0.839273	0.345833	0.290969	0.00768	0.020741	0.862635	0.171901	0.548424	0.512822	0.649148	0.222877	0.772977	0.561649	0.698343	0.016633
OG0000607	410	6	2	3	3	2	2	2	7	3	3	3	3	2	3	4	3	3	3	2	3	3	31	3	11	6	9	15	9	3	2	3	0.0001	0.015338	0.440855	0.637804	0.814454	0.559421	0.559421	0.458252	0.004928	0.525153	0.506474	0.585106	0.683116	0.279572	0.53238	0.069966	0.61971
OG0000306	180	10	5	9	5	6	10	8	10	9	9	9	12	11	11	12	10	11	11	19	9	9	1	3	3	3	4	9	5	8	7	8	0.0006	0.478233	0.024042	0.774602	0.04452	0.013512	0.034144	0.681824	0.528461	0.56997	0.519047	0.697872	0.352802	0.841801	0.604401	0.233063	0.444851
OG0000493	323	9	6	6	4	2	5	4	4	5	5	5	10	9	9	9	12	10	9	5	5	5	7	5	5	1	5	9	5	5	4	5	0.0021	0.06859	0.855941	0.135259	0.608768	0.003285	0.062964	0.572743	0.601916	0.540866	0.510719	0.629747	0.306911	0.82128	0.588139	0.422639	0.090659
OG0000602	406	4	3	4	3	6	1	4	7	4	4	4	5	5	4	4	4	4	4	5	4	4	7	4	5	5	5	9	5	4	2	4	0.0031	0.815995	0.5075	0.670307	0.562934	0.009819	8.9e-05	0.824778	0.047193	0.533111	0.508603	0.60847	0.155479	0.155479	0.542465	0.649559	0.649559
OG0002454	1743	0	1	1	0	2	1	1	2	1	1	1	4	0	1	0	1	1	1	0	1	1	0	5	4	12	5	9	5	2	2	2	0.0001	0.209991	0.644064	0.554022	0.254217	0.01581	0.531151	0.653052	0.091158	0.508604	0.502172	0.531151	0.000255	0.11368	0.511161	0.068126	0.545784
OG0002753	1953	1	0	1	0	0	0	0	1	1	1	1	0	1	1	0	0	0	1	0	1	1	0	1	1	22	5	9	5	1	1	1	0.0002	0.644064	0.209991	0.554022	0.254217	0.5	0.5	0.222606	0.671201	0.508604	0.502172	0.531151	0.11368	0.576855	0.511161	0.5	0.5
OG0000519	345	7	8	7	6	9	12	10	9	7	7	7	5	5	6	9	6	6	6	7	6	6	3	2	3	3	3	6	3	4	1	4	0.0051	0.868419	0.418741	0.741913	0.670117	0.330764	0.049215	0.101996	0.204184	0.55579	0.51491	0.093557	0.433673	0.433673	0.561649	0.003646	0.698343
OG0000175	85	11	9	10	9	8	13	10	14	10	10	10	7	7	9	11	13	11	9	7	10	10	16	14	14	10	13	20	13	10	8	10	0.0022	0.502248	0.686459	0.78782	0.724959	0.020523	0.004902	0.896996	0.082759	0.576793	0.521095	0.711456	0.163444	0.163444	0.588139	0.777305	0.103513
OG0000481	313	3	2	4	3	3	4	4	9	5	5	5	3	7	5	5	5	5	5	13	5	5	7	9	9	14	10	16	10	5	2	5	0	0.5075	0.15032	0.306179	0.248093	0.16458	0.60847	0.572743	0.017585	0.540866	0.510719	0.629747	0.033179	0.074833	0.552217	0.675585	0.675585
OG0000783	537	0	2	2	1	3	0	2	3	2	2	2	1	0	1	2	0	1	1	6	2	2	19	7	13	22	13	18	12	2	2	2	0.0001	0.021962	0.729234	0.599453	0.404097	0.031623	0.000617	0.739903	0.185667	0.516986	0.50433	0.559421	0.576855	0.11368	0.511161	0.02339	0.068126
OG0000505	335	4	4	5	5	4	8	6	6	6	6	6	6	5	6	6	7	6	6	13	6	6	4	4	5	5	6	10	6	6	6	6	0.0341	0.55685	0.55685	0.345833	0.643204	0.00768	0.020741	0.862635	0.874374	0.548424	0.512822	0.649148	0.772977	0.433673	0.561649	0.698343	0.136482
OG0001127	787	3	1	2	2	1	2	2	3	2	2	2	4	2	2	2	3	2	2	1	2	2	16	3	7	6	6	10	6	3	3	3	0.0035	0.154062	0.347221	0.599453	0.765192	0.089163	0.559421	0.739903	0.185667	0.516986	0.50433	0.559421	0.014969	0.636472	0.52195	0.585379	0.046794
OG0000050	9	27	24	26	25	22	29	26	50	26	26	26	27	24	27	32	31	30	27	18	24	24	4	4	5	5	8	14	9	20	15	19	0.001	0.68314	0.56817	0.879895	0.830514	0.003798	0.04394	0.937522	0	0.665691	0.55213	0.086506	0.905191	0.202807	0.703088	0.19084	0.455909
OG0000164	77	15	11	13	14	7	13	11	19	13	13	13	11	13	12	14	11	12	12	19	13	13	7	6	7	11	9	14	9	9	1	8	0.0001	0.297004	0.415832	0.81856	0.610236	0.000169	0.057179	0.434166	0.021018	0.596257	0.527161	0.745931	0.58748	0.373163	0.612143	0.116332	0.465063
OG0000850	579	6	5	5	5	3	8	5	7	5	5	5	4	3	4	4	4	4	4	10	5	5	1	1	1	3	2	4	2	4	3	4	0.0209	0.337518	0.839273	0.697969	0.863415	0.005286	0.000742	0.846908	0.137814	0.540866	0.510719	0.629747	0.719948	0.340635	0.542465	0.649559	0.649559
OG0000937	646	6	4	5	4	4	8	6	7	5	5	5	5	5	5	4	2	4	5	9	5	5	0	2	2	2	2	4	2	4	3	4	0.0065	0.337518	0.55685	0.697969	0.608768	0.00768	0.020741	0.355305	0.137814	0.540866	0.510719	0.629747	0.749318	0.749318	0.552217	0.649559	0.007369
OG0002498	1772	2	1	1	6	3	1	1	1	1	1	1	1	1	1	2	1	1	1	1	1	1	1	2	2	2	2	4	2	1	1	1	0.0403	0.076229	0.644064	0.554022	0.000135	0.0005	0.531151	0.653052	0.671201	0.508604	0.502172	0.531151	0.576855	0.576855	0.511161	0.02339	0.545784
OG0000043	6	19	23	23	27	19	34	26	35	25	25	25	16	15	18	19	19	19	18	32	24	24	26	33	29	24	28	37	28	23	18	22	0.0003	0.196586	0.930685	0.301086	0.513038	7e-06	2e-06	0.689129	0.007568	0.661096	0.550282	0.311469	0.315268	0.122788	0.653713	0.839352	0.839352
OG0000333	200	11	6	9	7	8	12	10	13	9	9	9	6	5	6	6	6	6	6	18	9	9	8	3	5	7	5	1	5	7	4	7	0.0001	0.211248	0.131993	0.774602	0.389837	0.020523	0.049215	0.495801	0.067874	0.56997	0.519047	0.697872	0.772977	0.433673	0.561649	0.698343	0.698343
OG0000369	229	11	4	8	6	4	9	7	10	8	8	8	10	9	9	8	10	9	9	11	8	8	3	4	4	10	5	1	5	7	5	7	0.0006	0.111543	0.017621	0.759424	0.36108	0.000606	0.027188	0.662268	0.234222	0.56297	0.516985	0.683051	0.306911	0.82128	0.588139	0.398151	0.196747
OG0000421	270	8	5	8	7	6	11	8	9	8	8	8	7	4	6	6	7	6	6	12	8	8	5	4	5	10	5	1	5	8	10	8	0.008	0.878131	0.065054	0.759424	0.691827	0.013512	0.002721	0.883526	0.502237	0.56297	0.516985	0.683051	0.222877	0.045685	0.561649	0.698343	0.136482
OG0000457	298	16	9	9	6	8	13	10	11	8	8	8	3	4	4	4	4	4	4	3	5	5	7	7	6	10	5	1	5	4	1	4	0	0.001351	0.885942	0.20653	0.36108	0.020523	0.004902	0.202092	0.093912	0.56297	0.516985	0.000742	0.340635	0.719948	0.542465	0.649559	0.649559
OG0000940	649	5	3	3	3	3	3	3	3	3	3	3	4	5	5	5	5	5	5	3	3	3	18	4	7	6	5	1	5	3	1	3	0.01	0.102994	0.781861	0.637804	0.814454	0.585106	0.585106	0.791855	0.810177	0.525153	0.506474	0.585106	0.391267	0.749318	0.552217	0.675585	0.675585
OG0001611	1144	3	1	2	1	1	2	2	3	2	2	2	1	2	2	1	3	2	2	2	2	2	6	4	5	13	5	1	5	3	3	3	0.0269	0.154062	0.347221	0.599453	0.404097	0.089163	0.559421	0.739903	0.185667	0.516986	0.50433	0.559421	0.20519	0.636472	0.52195	0.128168	0.046794
OG0000148	67	12	9	12	9	7	16	12	19	13	13	13	11	9	11	12	12	12	11	24	14	14	7	4	6	15	8	3	8	15	21	16	0.0001	0.902524	0.188688	0.523243	0.133287	1.5e-05	0.000715	0.73592	0.021018	0.596257	0.527161	0.407107	0.841801	0.203077	0.604401	0.788184	0.788184
OG0000340	207	7	6	7	12	5	9	7	8	7	7	7	5	5	6	9	7	7	6	8	7	7	24	7	12	11	9	3	8	6	2	6	0.0001	0.868419	0.624692	0.741913	0.012469	0.010433	0.027188	0.874381	0.471368	0.55579	0.51491	0.66686	0.433673	0.433673	0.561649	0.052994	0.718304
OG0000204	108	4	12	9	10	14	12	13	34	10	9	9	11	5	6	6	4	6	6	1	6	6	17	8	11	9	10	15	10	6	3	6	0.0002	0.006296	0.079578	0.774602	0.536203	0.191281	0.389951	0.105694	0	0.038757	0.519047	0.001238	0.000228	0.433673	0.561649	0.698343	0.016633
OG0000197	102	5	7	7	7	9	11	9	11	7	7	7	7	7	7	8	8	8	7	7	7	7	42	13	19	13	13	6	12	7	5	7	0.0003	0.266775	0.868419	0.741913	0.887207	0.697872	0.041513	0.174307	0.03991	0.55579	0.51491	0.66686	0.792239	0.792239	0.570772	0.735868	0.735868
OG0000299	174	12	9	10	8	9	15	11	14	10	10	10	10	10	10	9	10	10	10	14	10	10	5	4	4	3	3	0	3	7	3	7	0.0005	0.234875	0.686459	0.78782	0.415285	0.024399	0.000529	0.51937	0.082759	0.576793	0.521095	0.711456	0.832372	0.832372	0.596403	0.422639	0.765103
OG0000534	355	12	12	10	7	7	11	9	9	8	8	8	6	4	6	6	6	6	6	1	6	6	3	4	3	3	3	0	3	4	2	4	0.0001	0.234875	0.234875	0.084911	0.691827	0.016885	0.041513	0.468625	0.502237	0.56297	0.516985	0.020741	0.772977	0.045685	0.561649	0.698343	0.698343
OG0000664	457	6	5	6	6	5	9	7	10	6	6	6	5	4	5	5	5	5	5	4	5	5	2	5	3	4	3	0	3	4	2	4	0.0189	0.855941	0.594718	0.721613	0.877033	0.010433	0.027188	0.399654	0.027761	0.548424	0.512822	0.078376	0.749318	0.391267	0.552217	0.675585	0.675585
OG0000855	583	2	2	3	6	4	4	4	3	4	4	4	4	8	6	7	8	7	6	3	4	4	8	1	3	6	3	0	3	4	3	4	0.0066	0.440855	0.440855	0.260933	0.107707	0.60847	0.60847	0.824778	0.555548	0.533111	0.508603	0.60847	0.045685	0.097728	0.561649	0.718304	0.157328
OG0001030	719	6	3	4	3	3	6	4	5	4	4	4	4	3	3	3	3	3	3	8	4	4	6	4	4	3	3	0	3	3	2	3	0.0288	0.076569	0.5075	0.670307	0.562934	0.16458	0.009819	0.824778	0.335112	0.533111	0.508603	0.60847	0.118466	0.683116	0.53238	0.61971	0.61971
OG0001553	1103	6	2	3	2	2	3	3	6	3	3	3	3	1	3	4	6	4	3	3	3	3	4	3	3	4	3	0	3	3	2	3	0.0089	0.015338	0.440855	0.637804	0.498896	0.128423	0.585106	0.791855	0.024996	0.525153	0.506474	0.585106	0.683116	0.012219	0.53238	0.649559	0.020376
OG0000426	274	1	6	6	9	6	7	7	13	7	7	7	8	6	7	7	6	7	7	6	7	7	5	5	6	7	7	11	7	8	11	8	0.0414	0.000567	0.855941	0.380748	0.211802	0.257201	0.66686	0.874381	0.005492	0.55579	0.51491	0.66686	0.253098	0.469541	0.570772	0.718304	0.341012
OG0000536	357	4	3	4	3	3	7	5	6	5	5	5	6	5	5	4	4	4	5	12	6	6	9	2	6	6	7	11	7	7	9	7	0.0026	0.815995	0.5075	0.306179	0.248093	0.005286	0.01491	0.846908	0.389852	0.540866	0.510719	0.228721	0.190333	0.749318	0.552217	0.649559	0.649559
OG0000799	549	3	2	3	2	2	3	3	4	3	3	3	3	2	3	3	2	3	3	10	3	3	25	2	9	5	7	11	7	3	2	3	0.0001	0.781861	0.440855	0.637804	0.498896	0.128423	0.585106	0.791855	0.267687	0.525153	0.506474	0.585106	0.683116	0.279572	0.53238	0.61971	0.181245
OG0000195	100	6	4	6	6	4	7	6	7	7	7	7	10	12	10	7	10	9	10	13	8	8	44	15	21	6	15	21	15	8	5	8	0.0004	0.855941	0.231646	0.380748	0.670117	0.00768	0.093557	0.638702	0.884835	0.55579	0.51491	0.283578	0.832372	0.098857	0.596403	0.03491	0.196747
OG0000129	51	13	9	12	7	10	11	11	17	12	12	12	12	14	13	15	14	14	13	12	12	12	34	2	14	19	14	7	13	13	15	13	0.0002	0.542074	0.188688	0.809565	0.03133	0.351899	0.723924	0.724994	0.045619	0.589932	0.525152	0.735383	0.603333	0.392004	0.619639	0.281894	0.806658
OG0000140	60	13	10	13	10	11	20	15	21	14	14	14	13	14	13	13	12	13	13	28	14	14	16	4	9	11	9	4	9	11	5	10	0.0001	0.906607	0.206117	0.539501	0.147486	0.000562	0.000144	0.589189	0.009741	0.602425	0.529157	0.755654	0.856918	0.392004	0.619639	0.797918	0.483512
OG0000052	11	25	15	20	19	19	27	22	38	20	20	20	13	7	13	15	16	15	14	22	18	18	33	19	24	16	21	28	21	16	9	15	0.0003	0.081767	0.055737	0.86014	0.806509	0.014695	0.000688	0.420414	1e-06	0.636379	0.540865	0.116017	0.856918	0.000262	0.194616	0.814531	0.296755
OG0000138	58	17	9	14	39	11	10	11	16	15	15	15	26	12	15	11	16	14	15	10	14	14	9	5	6	5	6	2	6	12	10	12	0.0003	0.151761	0.023786	0.554327	0	0.723924	0.351899	0.12583	0.629735	0.608441	0.53114	0.203879	1e-06	0.052342	0.633924	0.013016	0.071452
OG0000489	319	7	6	7	5	6	8	7	21	7	7	7	3	7	5	4	4	4	5	6	6	6	14	4	7	7	6	2	6	5	3	5	0.0001	0.868419	0.624692	0.741913	0.328372	0.257201	0.108472	0.874381	0	0.55579	0.51491	0.093557	0.033179	0.074833	0.552217	0.649559	0.649559
OG0000511	340	5	11	6	4	5	5	5	8	6	6	6	3	5	5	6	5	5	5	7	6	6	13	4	7	10	6	2	6	5	1	5	0.0007	0.594718	0.00358	0.721613	0.290969	0.629747	0.629747	0.609631	0.171901	0.548424	0.512822	0.649148	0.033179	0.749318	0.552217	0.114925	0.675585
OG0000626	427	2	3	3	8	2	4	3	5	3	3	3	2	1	2	2	2	2	2	2	3	3	29	4	10	12	7	2	6	3	3	3	0.0001	0.440855	0.781861	0.637804	0.001431	0.128423	0.047362	0.791855	0.069258	0.525153	0.506474	0.585106	0.636472	0.20519	0.52195	0.585379	0.585379
OG0000788	542	9	5	5	6	5	4	5	6	5	5	5	2	1	2	2	2	2	2	3	4	4	16	4	7	9	6	2	6	4	2	4	0.002	0.009783	0.839273	0.697969	0.398322	0.629747	0.197925	0.846908	0.389852	0.540866	0.510719	0.062964	0.636472	0.20519	0.52195	0.585379	0.585379
OG0001010	704	3	1	2	3	1	2	2	2	2	2	2	3	2	2	2	2	2	2	2	2	2	16	6	9	15	7	2	6	2	2	2	0.0145	0.154062	0.347221	0.599453	0.191135	0.089163	0.559421	0.739903	0.760273	0.516986	0.50433	0.559421	0.079663	0.636472	0.52195	0.585379	0.585379
OG0001108	772	1	2	2	3	2	4	3	4	3	3	3	2	1	2	2	1	2	2	6	3	3	12	6	7	10	6	2	6	4	5	4	0.0213	0.347221	0.729234	0.209068	0.814454	0.128423	0.047362	0.791855	0.267687	0.525153	0.506474	0.585106	0.636472	0.20519	0.52195	0.585379	0.128168
OG0000680	467	4	3	4	3	3	6	4	5	4	4	4	3	3	3	3	3	3	3	10	4	4	11	3	7	9	8	12	8	5	5	5	0.0187	0.815995	0.5075	0.670307	0.562934	0.16458	0.009819	0.824778	0.335112	0.533111	0.508603	0.60847	0.683116	0.683116	0.53238	0.61971	0.61971
OG0001601	1136	3	6	4	7	2	5	4	6	4	4	4	3	1	3	4	6	4	3	1	3	3	1	2	1	0	1	2	1	2	1	2	0.0002	0.5075	0.076569	0.670307	0.050557	0.003285	0.062964	0.824778	0.102955	0.533111	0.508603	0.047362	0.683116	0.012219	0.53238	0.649559	0.020376
OG0002079	1483	2	1	2	0	0	1	1	5	2	2	2	9	9	7	2	4	4	5	3	3	3	0	0	0	2	1	2	1	3	3	3	0.0002	0.729234	0.347221	0.599453	0.035782	0.046475	0.531151	0.363929	0.009646	0.516986	0.50433	0.128423	0.120649	0.120649	0.002081	0.007369	0.649559
OG0002210	1575	5	2	3	4	1	1	1	4	3	3	3	0	4	3	4	4	4	3	5	3	3	0	1	1	1	1	2	1	2	1	2	0.0231	0.102994	0.440855	0.637804	0.274992	0.531151	0.531151	0.055491	0.267687	0.525153	0.506474	0.585106	0.000681	0.118466	0.53238	0.649559	0.649559
OG0004168	2902	1	1	1	3	1	6	2	2	2	2	2	2	1	1	1	1	1	1	2	2	2	0	1	1	1	1	2	1	2	2	2	0.0298	0.644064	0.644064	0.149344	0.191135	0.089163	2e-06	0.739903	0.760273	0.516986	0.50433	0.559421	0.039773	0.576855	0.511161	0.545784	0.545784
OG0004399	3055	1	1	1	0	3	0	1	2	1	1	1	3	5	3	2	1	2	2	0	1	1	0	0	0	2	1	2	1	1	1	1	0.0017	0.644064	0.644064	0.554022	0.254217	0.0005	0.046475	0.653052	0.091158	0.508604	0.502172	0.531151	0.683116	0.032188	0.011223	0.585379	0.128168
OG0000335	202	3	4	4	4	4	6	5	11	5	5	5	1	4	4	4	4	4	4	9	5	5	38	11	17	12	11	5	10	5	3	5	0.0003	0.5075	0.815995	0.306179	0.608768	0.197925	0.078376	0.846908	0.00148	0.540866	0.510719	0.629747	0.00177	0.719948	0.542465	0.649559	0.649559
OG0000083	33	13	18	16	16	14	22	17	22	16	16	16	19	14	15	16	12	15	15	16	15	15	25	17	19	20	16	9	15	12	3	11	0.0001	0.253728	0.347704	0.84008	0.927244	0.007749	0.000242	0.614463	0.036194	0.614309	0.53311	0.216128	0.025331	0.63037	0.633924	0.296755	0.015394
OG0000075	26	14	23	18	17	14	15	15	21	18	18	18	29	34	28	28	23	26	27	21	18	18	7	7	7	8	7	3	7	14	10	14	0.0002	0.145453	0.066924	0.851063	0.795919	0.423158	0.764629	0.300615	0.256776	0.625616	0.537013	0.787733	0.563407	0.01145	0.144381	0.162568	0.050665
OG0000302	177	8	6	7	11	5	6	6	6	7	7	7	6	6	7	8	11	8	7	9	7	7	43	4	12	5	7	3	7	6	4	6	0.0004	0.418741	0.624692	0.741913	0.043149	0.228721	0.649148	0.638702	0.664173	0.55579	0.51491	0.66686	0.469541	0.469541	0.570772	0.735868	0.007675
OG0000577	385	7	3	4	2	2	3	3	4	4	4	4	6	7	6	7	10	7	6	6	4	4	14	11	11	9	8	3	7	4	3	4	0.0055	0.029965	0.5075	0.670307	0.199136	0.128423	0.585106	0.524334	0.840469	0.533111	0.508603	0.60847	0.772977	0.222877	0.561649	0.718304	0.00546
OG0000235	129	16	12	12	9	16	11	13	12	11	11	11	17	13	13	10	11	11	13	11	11	11	6	3	4	3	4	1	4	8	3	7	0.0002	0.07676	0.902524	0.268025	0.437957	0.009489	0.032766	0.275197	0.570717	0.583445	0.52313	0.723924	0.017651	0.856918	0.619639	0.444851	0.777305
OG0000242	133	15	8	11	9	9	12	11	15	11	11	11	9	12	11	13	12	12	11	24	11	11	6	4	4	4	4	1	4	8	4	8	0.0001	0.065065	0.170484	0.799389	0.437957	0.024399	0.165034	0.902157	0.097799	0.583445	0.52313	0.723924	0.203077	0.352802	0.604401	0.250074	0.788184
OG0000266	150	12	9	10	9	8	16	11	16	10	10	10	9	9	9	9	8	9	9	17	10	10	5	1	3	7	4	1	4	7	2	6	0	0.234875	0.686459	0.78782	0.724959	0.00237	3.9e-05	0.51937	0.009744	0.576793	0.521095	0.711456	0.82128	0.82128	0.588139	0.751372	0.398151
OG0000366	226	10	7	9	7	8	9	9	13	9	9	9	11	9	9	8	7	8	9	11	9	9	5	0	3	8	4	1	4	7	5	7	0.0192	0.478233	0.326817	0.774602	0.389837	0.308042	0.697872	0.890895	0.067874	0.56997	0.519047	0.697872	0.085395	0.82128	0.588139	0.735868	0.371066
OG0000468	303	8	5	7	5	5	9	7	9	7	7	7	8	8	8	8	8	8	8	13	7	7	6	2	4	5	4	1	4	6	5	6	0.0225	0.418741	0.266775	0.741913	0.328372	0.010433	0.027188	0.874381	0.204184	0.55579	0.51491	0.66686	0.808091	0.808091	0.579599	0.735868	0.735868
OG0000490	320	8	4	7	4	5	17	9	8	7	7	7	7	4	6	7	6	6	6	13	7	7	2	7	4	4	4	1	4	6	5	6	0	0.418741	0.050244	0.741913	0.133279	7.4e-05	0	0.174307	0.471368	0.55579	0.51491	0.66686	0.222877	0.045685	0.561649	0.136482	0.698343
OG0000494	324	8	6	7	6	5	10	7	9	7	7	7	7	7	7	6	6	6	7	9	7	7	5	3	4	6	4	1	4	6	4	6	0.0494	0.418741	0.624692	0.741913	0.670117	0.010433	0.001894	0.874381	0.204184	0.55579	0.51491	0.66686	0.792239	0.792239	0.570772	0.698343	0.698343
OG0000629	430	12	4	6	4	4	7	6	9	6	6	6	4	4	5	5	6	5	5	6	6	6	3	7	4	5	4	1	4	6	5	6	0.0099	0.001271	0.231646	0.721613	0.290969	0.00768	0.093557	0.862635	0.100455	0.548424	0.512822	0.649148	0.391267	0.391267	0.552217	0.675585	0.114925
OG0000631	431	6	5	6	4	5	7	6	10	6	6	6	5	6	5	5	5	5	5	11	6	6	3	5	4	9	4	1	4	5	3	5	0.0397	0.855941	0.594718	0.721613	0.290969	0.228721	0.093557	0.862635	0.027761	0.548424	0.512822	0.649148	0.749318	0.190333	0.552217	0.675585	0.675585
OG0000719	493	5	5	5	4	3	7	5	8	5	5	5	4	5	5	5	5	5	5	11	5	5	5	3	4	7	4	1	4	4	1	4	0.0013	0.839273	0.839273	0.697969	0.608768	0.005286	0.01491	0.846908	0.073135	0.540866	0.510719	0.629747	0.391267	0.749318	0.552217	0.675585	0.675585
OG0000721	494	4	4	5	4	4	10	6	7	5	5	5	4	5	5	4	5	5	5	10	5	5	4	4	4	7	4	1	4	4	3	4	0.0014	0.55685	0.55685	0.697969	0.608768	0.00768	6.2e-05	0.355305	0.137814	0.540866	0.510719	0.629747	0.391267	0.749318	0.552217	0.270185	0.675585
OG0000734	505	5	5	5	4	5	8	6	6	5	5	5	4	4	4	4	4	4	4	8	5	5	1	2	2	15	4	1	4	5	4	5	0.0375	0.839273	0.839273	0.697969	0.608768	0.228721	0.020741	0.355305	0.389852	0.540866	0.510719	0.629747	0.719948	0.719948	0.542465	0.649559	0.649559
OG0000866	593	2	3	4	4	3	5	4	6	5	5	5	5	3	4	4	4	4	4	9	5	5	2	8	4	8	4	1	4	5	6	5	0.0408	0.15032	0.5075	0.306179	0.608768	0.16458	0.062964	0.572743	0.389852	0.540866	0.510719	0.629747	0.155479	0.340635	0.542465	0.649559	0.649559
OG0000885	606	3	7	4	4	5	4	4	3	4	4	4	3	3	3	3	3	3	3	4	4	4	13	3	5	6	4	1	4	3	1	3	0.0289	0.5075	0.029965	0.670307	0.844061	0.062964	0.60847	0.824778	0.555548	0.533111	0.508603	0.60847	0.683116	0.683116	0.53238	0.61971	0.61971
OG0000985	685	5	3	4	4	2	5	4	5	4	4	4	4	3	4	2	4	4	4	10	4	4	3	6	4	9	4	1	4	3	1	3	0.0005	0.285654	0.5075	0.670307	0.844061	0.003285	0.062964	0.824778	0.335112	0.533111	0.508603	0.60847	0.719948	0.340635	0.542465	0.007369	0.649559
OG0001273	901	1	2	2	2	2	2	2	4	3	3	3	2	3	3	2	4	3	3	3	3	3	16	2	5	7	4	1	4	3	3	3	0.0054	0.347221	0.729234	0.209068	0.498896	0.559421	0.559421	0.458252	0.267687	0.525153	0.506474	0.585106	0.279572	0.683116	0.53238	0.181245	0.069966
OG0001274	902	1	1	2	1	2	4	3	4	3	3	3	3	2	3	2	4	3	3	5	3	3	13	12	9	2	4	1	4	3	1	3	0.0005	0.347221	0.347221	0.209068	0.144205	0.128423	0.047362	0.791855	0.267687	0.525153	0.506474	0.585106	0.683116	0.279572	0.53238	0.181245	0.069966
OG0001300	920	1	2	2	1	4	2	2	2	2	2	2	2	3	2	1	2	2	2	2	2	2	3	2	3	32	5	1	4	2	2	2	0.0001	0.347221	0.729234	0.599453	0.404097	0.00244	0.559421	0.739903	0.760273	0.516986	0.50433	0.559421	0.636472	0.079663	0.52195	0.128168	0.585379
OG0001361	963	1	3	2	2	2	1	2	2	2	2	2	1	1	2	2	5	2	2	2	2	2	20	4	7	7	5	1	4	2	1	2	0.0001	0.347221	0.154062	0.599453	0.765192	0.559421	0.089163	0.739903	0.760273	0.516986	0.50433	0.559421	0.20519	0.20519	0.52195	0.585379	0.000191
OG0001459	1030	2	2	3	2	2	5	3	4	3	3	3	2	2	2	2	2	2	2	5	3	3	8	1	4	8	4	1	4	3	4	3	0.0391	0.440855	0.440855	0.637804	0.498896	0.128423	0.005608	0.791855	0.267687	0.525153	0.506474	0.585106	0.636472	0.636472	0.52195	0.585379	0.585379
OG0001485	1053	1	2	2	2	1	3	2	2	2	2	2	6	1	3	2	4	3	3	2	2	2	13	4	6	4	4	1	4	3	3	3	0.0005	0.347221	0.729234	0.599453	0.765192	0.089163	0.031623	0.739903	0.760273	0.516986	0.50433	0.559421	0.00251	0.012219	0.53238	0.181245	0.069966
OG0000240	132	7	7	9	12	7	11	9	13	10	10	10	10	28	16	24	13	17	16	7	10	10	1	0	1	2	3	5	3	8	7	8	0.0001	0.326817	0.326817	0.463582	0.295976	0.016885	0.041513	0.698371	0.130346	0.576793	0.521095	0.711456	0.000681	0	0.640731	2.1e-05	0.0035
OG0000648	443	6	6	6	7	4	8	6	9	6	6	6	4	4	5	5	5	5	5	11	6	6	1	4	3	3	3	5	3	4	2	4	0.008	0.855941	0.855941	0.721613	0.442944	0.00768	0.020741	0.862635	0.100455	0.548424	0.512822	0.649148	0.391267	0.391267	0.552217	0.675585	0.675585
OG0000861	588	8	4	4	3	3	4	4	11	4	4	4	5	4	5	7	7	7	5	2	4	4	2	2	2	5	3	5	3	3	1	3	0.0021	0.005362	0.815995	0.670307	0.562934	0.16458	0.60847	0.824778	0.000177	0.533111	0.508603	0.60847	0.749318	0.391267	0.552217	0.718304	0.718304
OG0000906	622	4	3	3	3	3	5	4	4	3	3	3	1	1	1	1	1	1	1	12	3	3	2	3	3	3	3	5	3	3	2	3	0.0245	0.224621	0.781861	0.637804	0.814454	0.16458	0.062964	0.238877	0.267687	0.525153	0.506474	0.585106	0.576855	0.576855	0.511161	0.545784	0.545784
OG0000095	38	11	14	15	20	10	13	12	25	16	16	16	15	18	16	15	18	16	16	19	16	16	12	12	12	17	12	7	12	14	10	14	0.0022	0.112206	0.74458	0.567899	0.125179	0.028488	0.178332	0.13778	0.00323	0.614309	0.53311	0.772927	0.642009	0.177782	0.640731	0.530209	0.086667
OG0000224	122	7	7	7	6	8	9	8	12	7	7	7	8	7	7	7	8	7	7	9	7	7	41	8	17	15	13	7	12	6	2	6	0.0003	0.868419	0.868419	0.741913	0.670117	0.683051	0.123096	0.436955	0.011256	0.55579	0.51491	0.66686	0.253098	0.792239	0.570772	0.718304	0.157328
OG0000167	80	9	10	11	11	7	15	11	15	12	12	12	12	12	12	12	11	12	12	19	12	12	10	7	8	10	8	4	8	12	13	12	0.0017	0.37562	0.701215	0.505343	0.749327	0.000169	0.000529	0.724994	0.16562	0.589932	0.525152	0.735383	0.849897	0.849897	0.612143	0.788184	0.465063
OG0000263	148	11	6	9	11	8	7	8	11	9	9	9	8	8	8	8	8	8	8	11	9	9	3	16	8	12	8	4	8	8	4	8	0.0081	0.211248	0.131993	0.774602	0.27034	0.683051	0.283578	0.681824	0.261919	0.56997	0.519047	0.697872	0.808091	0.808091	0.579599	0.735868	0.735868
OG0000552	368	2	3	3	3	2	2	2	8	3	3	3	2	5	3	3	5	3	3	2	3	3	38	8	14	8	9	4	8	4	5	4	0.0003	0.440855	0.781861	0.637804	0.814454	0.559421	0.559421	0.458252	0.001262	0.525153	0.506474	0.585106	0.279572	0.032188	0.53238	0.61971	0.011894
OG0000782	536	1	4	3	1	4	2	3	4	3	3	3	4	1	3	3	2	3	3	2	3	3	25	16	15	10	9	4	8	3	2	3	0.0001	0.048657	0.224621	0.637804	0.144205	0.047362	0.128423	0.791855	0.267687	0.525153	0.506474	0.585106	0.118466	0.012219	0.53238	0.61971	0.181245
OG0000322	193	18	14	12	12	4	6	6	6	9	9	9	12	15	11	12	5	10	11	8	9	9	5	1	2	2	2	0	2	5	1	5	0.0001	0.008374	0.277689	0.01562	0.118031	0.00768	0.649148	0.146161	0.175236	0.56997	0.519047	0.697872	0.352802	0.011254	0.604401	0.090659	4.3e-05
OG0000336	203	10	8	10	12	7	10	9	12	10	10	10	15	10	13	16	13	14	13	12	10	10	3	1	2	1	2	0	2	6	1	5	0	0.892395	0.352445	0.78782	0.295976	0.016885	0.137407	0.698371	0.287356	0.576793	0.521095	0.711456	0.139185	0.039334	0.619639	0.071452	0.500405
OG0000448	292	10	6	8	6	6	11	8	12	8	8	8	6	5	6	7	6	6	6	11	8	8	1	3	2	4	2	0	2	8	8	8	0.0114	0.186141	0.298384	0.759424	0.36108	0.013512	0.002721	0.883526	0.053452	0.56297	0.516985	0.683051	0.772977	0.433673	0.561649	0.136482	0.698343
OG0000813	561	6	4	6	5	3	5	5	13	6	6	6	7	3	6	6	6	6	6	9	6	6	1	2	2	2	2	0	2	4	2	4	0.0019	0.855941	0.231646	0.721613	0.643204	0.005286	0.629747	0.609631	0.000666	0.548424	0.512822	0.649148	0.222877	0.005964	0.561649	0.698343	0.698343
OG0000898	617	5	4	5	4	3	7	5	7	5	5	5	6	5	5	5	5	5	5	9	5	5	2	1	2	4	2	0	2	3	1	3	0.0085	0.839273	0.55685	0.697969	0.608768	0.005286	0.01491	0.846908	0.137814	0.540866	0.510719	0.629747	0.190333	0.749318	0.552217	0.675585	0.675585
OG0000986	686	6	2	4	3	2	4	3	4	4	4	4	6	6	6	5	7	6	6	7	4	4	1	4	2	4	2	0	2	3	2	3	0.0197	0.076569	0.15032	0.670307	0.562934	0.128423	0.047362	0.524334	0.840469	0.533111	0.508603	0.60847	0.772977	0.772977	0.561649	0.307554	0.136482
OG0001095	763	3	2	3	3	3	9	5	5	4	4	4	4	4	4	4	4	4	4	7	4	4	0	2	2	6	2	0	2	4	4	4	0.0032	0.781861	0.440855	0.260933	0.562934	0.005286	3.3e-05	0.302254	0.335112	0.533111	0.508603	0.60847	0.719948	0.719948	0.542465	0.649559	0.649559
OG0001134	794	2	4	4	2	3	5	4	8	4	4	4	4	4	4	4	3	4	4	5	4	4	0	1	1	9	2	0	2	5	9	5	0.022	0.15032	0.815995	0.670307	0.199136	0.16458	0.062964	0.824778	0.009901	0.533111	0.508603	0.60847	0.719948	0.719948	0.542465	0.649559	0.228313
OG0001171	824	5	2	3	3	3	1	3	4	3	3	3	4	1	3	3	3	3	3	13	3	3	1	3	2	6	2	0	2	3	2	3	0.0002	0.102994	0.440855	0.637804	0.814454	0.585106	0.001716	0.791855	0.267687	0.525153	0.506474	0.585106	0.118466	0.012219	0.53238	0.61971	0.61971
OG0001269	897	2	1	2	1	3	2	3	5	3	3	3	9	8	7	8	5	7	7	4	3	3	2	2	2	2	2	0	2	3	3	3	0.0208	0.729234	0.347221	0.209068	0.144205	0.585106	0.128423	0.791855	0.069258	0.525153	0.506474	0.585106	0.120649	0.253098	0.570772	0.157328	0.022236
OG0001341	949	5	7	5	1	8	10	8	6	5	5	5	3	2	3	4	3	3	3	4	4	4	1	2	2	4	2	0	2	3	1	3	0.0049	0.839273	0.10414	0.697969	0.004803	0.683051	0.034144	0.055897	0.389852	0.540866	0.510719	0.062964	0.683116	0.279572	0.53238	0.069966	0.61971
OG0001388	982	4	6	4	3	3	2	3	2	3	3	3	3	2	3	7	2	3	3	3	3	3	2	3	2	3	2	0	2	4	9	5	0.0129	0.815995	0.076569	0.082766	0.814454	0.585106	0.128423	0.791855	0.491041	0.525153	0.506474	0.585106	0.683116	0.279572	0.53238	3.1e-05	0.181245
OG0001464	1035	1	1	2	3	0	2	2	4	3	3	3	10	9	7	5	5	5	6	8	4	4	3	2	2	1	2	0	2	3	2	3	0.0003	0.347221	0.347221	0.209068	0.814454	0.000617	0.559421	0.458252	0.267687	0.525153	0.506474	0.16458	0.021046	0.120649	0.033602	0.675585	0.675585
OG0001465	1036	6	5	4	4	3	5	4	4	4	4	4	3	3	3	3	0	3	3	8	4	4	0	3	2	3	2	0	2	3	2	3	0.003	0.076569	0.285654	0.670307	0.844061	0.16458	0.062964	0.824778	0.840469	0.533111	0.508603	0.60847	0.683116	0.683116	0.53238	0.61971	0.00011
OG0001614	1147	2	3	3	2	2	3	3	6	3	3	3	4	3	3	4	2	3	3	7	3	3	2	1	2	4	2	0	2	2	1	2	0.0302	0.440855	0.781861	0.637804	0.498896	0.128423	0.585106	0.791855	0.024996	0.525153	0.506474	0.585106	0.118466	0.683116	0.53238	0.069966	0.181245
OG0001673	1192	2	1	2	1	7	2	3	4	2	2	2	1	1	1	1	2	1	1	2	2	2	1	1	1	5	2	0	2	5	19	7	0.0001	0.729234	0.347221	0.599453	0.404097	7e-06	0.128423	0.164412	0.07543	0.516986	0.50433	0.559421	0.576855	0.576855	0.511161	0.545784	0.02339
OG0001688	1201	4	2	3	2	3	4	3	5	3	3	3	2	1	2	1	3	2	2	6	3	3	2	3	2	4	2	0	2	2	1	2	0.0242	0.224621	0.440855	0.637804	0.498896	0.585106	0.047362	0.791855	0.069258	0.525153	0.506474	0.585106	0.636472	0.20519	0.52195	0.128168	0.046794
OG0001786	1267	2	1	2	3	2	4	3	4	3	3	3	2	5	3	2	3	3	3	8	3	3	3	1	2	3	2	0	2	3	4	3	0.0274	0.729234	0.347221	0.209068	0.814454	0.128423	0.047362	0.791855	0.267687	0.525153	0.506474	0.585106	0.279572	0.032188	0.53238	0.181245	0.61971
OG0001869	1326	3	2	3	3	1	3	3	4	3	3	3	5	2	3	3	2	3	3	4	3	3	2	2	2	7	2	0	2	3	2	3	0.0433	0.781861	0.440855	0.637804	0.814454	0.001716	0.585106	0.791855	0.267687	0.525153	0.506474	0.585106	0.032188	0.279572	0.53238	0.61971	0.181245
OG0002286	1627	3	2	3	2	1	3	3	2	3	3	3	4	2	3	4	2	3	3	7	3	3	0	2	2	5	2	0	2	3	2	3	0.0096	0.781861	0.440855	0.637804	0.498896	0.001716	0.585106	0.791855	0.491041	0.525153	0.506474	0.585106	0.118466	0.279572	0.53238	0.069966	0.181245
OG0002583	1830	1	1	1	1	8	3	4	2	2	2	2	2	1	2	2	2	2	2	3	2	2	1	2	2	5	2	0	2	3	4	3	0.0203	0.644064	0.644064	0.149344	0.404097	1.6e-05	0.16458	0.060092	0.760273	0.516986	0.50433	0.559421	0.636472	0.20519	0.52195	0.585379	0.585379
OG0003018	2127	2	1	2	1	1	3	2	4	2	2	2	0	1	1	2	2	2	2	2	2	2	0	1	1	11	2	0	2	2	2	2	0.0068	0.729234	0.347221	0.599453	0.404097	0.089163	0.031623	0.739903	0.07543	0.516986	0.50433	0.559421	0.11368	0.576855	0.032926	0.585379	0.585379
OG0003043	2148	1	1	1	2	1	2	1	1	1	1	1	1	1	1	2	1	1	1	1	1	1	1	0	1	7	2	0	2	3	13	5	0.0386	0.644064	0.644064	0.554022	0.093689	0.531151	0.01581	0.653052	0.671201	0.508604	0.502172	0.531151	0.576855	0.576855	0.511161	0.02339	0.545784
OG0003659	2549	1	1	1	1	1	1	1	2	1	1	1	0	3	1	1	3	1	1	1	1	1	0	2	2	11	2	0	2	2	2	2	0.0079	0.644064	0.644064	0.554022	0.6758	0.531151	0.531151	0.653052	0.091158	0.508604	0.502172	0.531151	0.11368	0.003184	0.511161	0.545784	0.001097
OG0003750	2607	1	1	1	1	1	5	2	1	1	1	1	1	3	1	1	1	1	1	2	1	1	2	3	2	3	2	0	2	2	2	2	0.0282	0.644064	0.644064	0.554022	0.6758	0.089163	6e-05	0.081169	0.671201	0.508604	0.502172	0.531151	0.576855	0.003184	0.511161	0.545784	0.545784
OG0000137	57	11	10	10	15	5	5	5	12	10	10	10	20	18	16	14	14	14	15	8	10	10	34	16	19	7	14	18	14	9	3	8	0.0002	0.502248	0.892395	0.78782	0.032226	0.629747	0.629747	0.011293	0.287356	0.576793	0.521095	0.711456	0.02958	0.177782	0.082852	0.806658	0.806658
OG0000499	329	3	5	5	4	4	10	7	12	6	6	6	11	9	8	8	7	8	8	7	6	6	9	3	5	3	5	7	5	5	1	5	0	0.192783	0.839273	0.345833	0.290969	0.000606	0.001894	0.399654	0.003022	0.548424	0.512822	0.649148	0.028322	0.281069	0.579599	0.735868	0.371066
OG0000659	452	1	1	1	1	1	1	1	2	2	2	2	7	6	6	7	8	7	6	5	4	4	11	4	8	17	9	12	9	4	3	4	0.0082	0.644064	0.644064	0.149344	0.404097	0.531151	0.531151	0.363929	0.760273	0.516986	0.50433	0.003285	0.222877	0.772977	0.561649	0.718304	0.157328
OG0000810	558	1	2	2	2	2	4	2	3	2	2	2	2	3	2	2	2	2	2	2	2	2	18	12	12	8	9	12	9	2	1	2	0.0189	0.347221	0.729234	0.599453	0.765192	0.559421	0.00244	0.739903	0.185667	0.516986	0.50433	0.559421	0.636472	0.079663	0.52195	0.585379	0.585379
OG0000434	281	6	6	7	6	6	9	7	11	7	7	7	7	3	7	7	8	7	7	11	7	7	6	8	7	6	7	10	7	6	3	6	0.0045	0.624692	0.624692	0.741913	0.670117	0.257201	0.027188	0.874381	0.03991	0.55579	0.51491	0.66686	0.792239	0.001082	0.570772	0.718304	0.157328
OG0000346	211	8	5	6	5	6	8	7	6	6	6	6	5	3	4	3	4	4	4	6	6	6	15	16	14	10	12	16	12	6	3	6	0.0401	0.132156	0.594718	0.721613	0.643204	0.257201	0.108472	0.399654	0.874374	0.548424	0.512822	0.649148	0.155479	0.340635	0.542465	0.228313	0.649559
OG0000181	89	7	12	10	10	7	13	10	15	10	10	10	10	11	11	10	12	11	11	9	10	10	16	9	11	6	10	13	10	8	3	7	0	0.151553	0.234875	0.78782	0.906996	0.001798	0.004902	0.896996	0.029509	0.576793	0.521095	0.711456	0.569679	0.841801	0.604401	0.444851	0.233063
OG0000754	517	6	4	5	4	3	7	5	9	5	5	5	4	4	4	3	3	3	4	9	5	5	2	4	3	6	4	6	4	4	2	4	0.0057	0.337518	0.55685	0.697969	0.608768	0.005286	0.01491	0.846908	0.017585	0.540866	0.510719	0.629747	0.719948	0.719948	0.542465	0.61971	0.61971
OG0001109	773	1	4	4	4	3	6	4	5	4	4	4	2	2	2	2	3	2	2	7	4	4	6	1	4	4	4	6	4	4	2	4	0.0053	0.0137	0.815995	0.670307	0.844061	0.16458	0.009819	0.824778	0.335112	0.533111	0.508603	0.60847	0.636472	0.636472	0.52195	0.585379	0.046794
OG0001115	777	5	1	4	9	3	3	3	6	4	4	4	1	1	1	2	1	1	1	3	4	4	6	2	4	4	4	6	4	4	4	4	0.0332	0.285654	0.0137	0.670307	0.004219	0.585106	0.585106	0.524334	0.102955	0.533111	0.508603	0.60847	0.576855	0.576855	0.511161	0.02339	0.545784
OG0000338	205	17	17	12	5	5	8	7	9	8	8	8	8	6	8	7	11	8	8	10	8	8	5	4	5	6	6	8	6	6	1	5	0	0.026603	0.026603	0.0013	0.158518	0.010433	0.108472	0.662268	0.502237	0.56297	0.516985	0.683051	0.808091	0.142463	0.579599	0.371066	0.007675
OG0000447	291	0	4	4	15	4	6	5	6	5	5	5	11	11	10	13	11	11	10	2	5	5	3	9	6	7	6	8	6	5	3	5	0	0.000725	0.815995	0.306179	9e-06	0.197925	0.078376	0.846908	0.389852	0.540866	0.510719	0.629747	0.33077	0.33077	0.596403	0.103513	0.777305
OG0000613	416	5	5	5	6	4	8	6	7	5	5	5	5	5	5	5	4	5	5	4	5	5	1	3	3	13	6	8	6	5	3	5	0.0189	0.839273	0.839273	0.697969	0.398322	0.00768	0.020741	0.355305	0.137814	0.540866	0.510719	0.629747	0.749318	0.749318	0.552217	0.675585	0.270185
OG0000621	422	1	5	4	3	5	6	5	6	4	4	4	7	5	7	11	10	10	7	1	4	4	14	4	7	6	6	8	6	4	3	4	0	0.0137	0.285654	0.670307	0.562934	0.629747	0.078376	0.302254	0.102955	0.533111	0.508603	0.60847	0.792239	0.058999	0.570772	0.215292	0.765103
OG0000643	440	2	4	4	8	3	7	4	4	4	4	4	6	6	5	5	5	5	5	3	4	4	13	4	7	6	6	8	6	4	1	4	0.0005	0.15032	0.815995	0.670307	0.010867	0.16458	0.000395	0.824778	0.840469	0.533111	0.508603	0.60847	0.190333	0.190333	0.552217	0.675585	0.675585
OG0000151	68	12	12	11	7	14	11	12	19	11	11	11	12	14	14	16	20	16	14	7	11	11	37	4	14	6	11	14	11	9	2	8	0.0003	0.523358	0.523358	0.799389	0.067604	0.065343	0.371586	0.540019	0.002088	0.583445	0.52313	0.723924	0.256057	0.863063	0.626896	0.821649	0.006601
OG0000304	179	4	6	6	11	4	6	5	5	6	6	6	26	4	8	4	11	8	8	8	6	6	23	12	14	9	11	14	11	6	2	6	0.0001	0.231646	0.855941	0.721613	0.008093	0.197925	0.078376	0.609631	0.63684	0.548424	0.512822	0.649148	0	0.001754	0.579599	0.00022	0.007675
OG0000353	216	5	6	6	7	5	6	6	13	6	6	6	5	3	5	4	7	5	5	5	6	6	24	11	14	7	11	14	11	6	4	6	0.0004	0.594718	0.855941	0.721613	0.442944	0.228721	0.649148	0.862635	0.000666	0.548424	0.512822	0.649148	0.749318	0.033179	0.552217	0.270185	0.030285
OG0000102	42	9	9	11	25	7	12	10	14	13	13	13	20	18	18	21	15	18	18	10	13	13	15	18	17	22	18	22	18	12	9	12	0.0001	0.37562	0.37562	0.159648	0.00012	0.001798	0.049215	0.223519	0.603455	0.596257	0.527161	0.745931	0.201999	0.881554	0.653713	0.047295	0.023528
OG0000190	96	10	7	7	5	4	7	6	9	7	7	7	4	4	4	5	4	4	4	11	7	7	45	16	24	19	19	22	18	7	2	6	0.0004	0.08997	0.868419	0.741913	0.328372	0.00768	0.093557	0.638702	0.204184	0.55579	0.51491	0.66686	0.719948	0.719948	0.542465	0.092721	0.649559
OG0000061	19	15	17	16	17	15	16	16	20	16	16	16	15	13	14	13	13	13	14	20	16	16	35	34	32	30	28	32	27	14	3	12	0.0003	0.752773	0.599884	0.84008	0.64729	0.438195	0.772927	0.919726	0.11876	0.614309	0.53311	0.772927	0.409465	0.617546	0.626896	0.797918	0.797918
OG0000021	1	33	30	33	28	28	43	35	48	34	34	34	27	24	28	30	28	29	28	49	33	33	61	44	44	20	33	25	32	30	21	29	0.001	0.942395	0.427755	0.701898	0.155057	4.1e-05	1.5e-05	0.732474	0.001084	0.698774	0.566491	0.384105	0.729111	0.058397	0.707784	0.448129	0.647893
OG0000094	37	22	11	17	11	12	20	16	19	17	17	17	19	19	18	19	18	18	18	25	17	17	10	7	9	9	9	5	9	16	15	16	0.0002	0.059634	0.014655	0.845845	0.030643	0.000714	0.00188	0.769432	0.417058	0.620033	0.535068	0.780609	0.467942	0.467942	0.653713	0.337477	0.833984
OG0000221	119	17	10	11	12	12	7	10	14	10	10	10	9	13	10	8	12	10	10	4	9	9	24	6	11	9	9	5	9	8	6	8	0.0001	0.006318	0.701215	0.248592	0.295976	0.049215	0.001798	0.896996	0.082759	0.576793	0.521095	0.137407	0.54954	0.045013	0.596403	0.04182	0.090659
OG0000236	130	8	8	9	6	8	11	9	18	9	9	9	7	8	8	8	8	8	8	19	9	9	16	5	9	13	9	5	9	8	6	8	0.0001	0.669307	0.669307	0.774602	0.18267	0.308042	0.041513	0.890895	0.000392	0.56997	0.519047	0.697872	0.500173	0.808091	0.579599	0.735868	0.735868
OG0000180	88	8	7	9	22	7	18	11	12	10	10	10	9	7	9	7	11	9	9	7	9	9	38	8	16	5	12	15	12	8	2	7	0.0003	0.669307	0.326817	0.463582	1.9e-05	0.000169	0	0.51937	0.287356	0.576793	0.521095	0.137407	0.82128	0.163444	0.588139	0.03491	0.077868
OG0000420	269	9	7	8	8	7	11	9	9	8	8	8	9	6	9	10	13	10	9	7	8	8	1	2	2	3	3	4	3	7	5	7	0.0245	0.45067	0.649056	0.759424	0.895169	0.016885	0.041513	0.468625	0.502237	0.56297	0.516985	0.683051	0.82128	0.017219	0.588139	0.765103	0.013254
OG0000512	341	8	5	6	7	5	8	6	7	6	6	6	4	6	6	11	10	10	6	8	6	6	3	3	3	3	3	4	3	5	3	5	0.015	0.132156	0.594718	0.721613	0.442944	0.228721	0.020741	0.862635	0.434505	0.548424	0.512822	0.649148	0.045685	0.772977	0.561649	0.215292	0.765103
OG0000588	395	6	5	6	4	5	9	7	10	6	6	6	5	6	5	5	4	5	5	14	6	6	0	2	2	4	3	4	3	5	4	5	0.0017	0.855941	0.594718	0.721613	0.290969	0.010433	0.027188	0.399654	0.027761	0.548424	0.512822	0.649148	0.749318	0.190333	0.552217	0.675585	0.270185
OG0000988	688	3	2	3	11	2	2	2	3	4	4	4	6	7	6	5	3	5	6	7	5	5	1	2	2	4	3	4	3	5	5	5	0.0345	0.781861	0.440855	0.260933	0.00021	0.559421	0.559421	0.164034	0.555548	0.533111	0.508603	0.197925	0.772977	0.222877	0.561649	0.675585	0.011642
OG0001415	1000	3	1	3	1	1	2	2	4	3	3	3	4	2	3	3	3	3	3	12	3	3	2	2	2	9	3	4	3	3	3	3	0.0025	0.781861	0.048657	0.637804	0.144205	0.089163	0.559421	0.458252	0.267687	0.525153	0.506474	0.585106	0.118466	0.279572	0.53238	0.61971	0.61971
OG0001803	1277	2	2	2	2	2	4	2	3	2	2	2	2	2	2	1	3	2	2	6	2	2	1	6	3	4	3	4	3	2	2	2	0.0416	0.729234	0.729234	0.599453	0.765192	0.559421	0.00244	0.739903	0.185667	0.516986	0.50433	0.559421	0.636472	0.636472	0.52195	0.128168	0.046794
OG0000334	201	11	7	8	8	7	11	9	11	8	8	8	6	4	5	4	5	5	5	14	8	8	13	9	9	4	7	9	7	6	1	5	0	0.111543	0.649056	0.759424	0.895169	0.016885	0.041513	0.468625	0.093912	0.56297	0.516985	0.683051	0.190333	0.391267	0.552217	0.270185	0.675585
OG0000046	7	15	29	25	38	17	23	21	38	27	27	27	38	49	39	39	35	37	38	24	27	27	2	10	8	11	12	16	13	22	15	21	0.001	0.000647	0.161054	0.319517	0.005125	0.001873	0.071254	0.05865	0.004414	0.670177	0.553965	0.833619	0.770409	0.000389	0.195559	0.236115	0.352596
OG0000211	113	10	7	10	7	7	12	10	14	10	10	10	14	12	13	15	13	13	13	19	10	10	6	3	5	7	5	2	5	7	4	7	0.0001	0.892395	0.151553	0.78782	0.20556	0.001798	0.049215	0.896996	0.082759	0.576793	0.521095	0.711456	0.392004	0.603333	0.619639	0.063995	0.797918
OG0000212	114	16	10	12	13	9	16	12	14	12	12	12	11	11	11	12	13	12	11	10	11	11	4	3	4	7	5	2	5	8	4	8	0.0006	0.07676	0.396657	0.809565	0.595044	0.003033	0.000715	0.906602	0.332134	0.589932	0.525152	0.165034	0.841801	0.841801	0.604401	0.788184	0.250074
OG0000277	158	10	7	9	6	6	12	9	12	9	9	9	11	10	11	11	11	11	11	15	9	9	3	9	5	7	5	2	5	7	4	7	0.0001	0.478233	0.326817	0.774602	0.18267	0.001316	0.003723	0.890895	0.112157	0.56997	0.519047	0.697872	0.841801	0.569679	0.604401	0.777305	0.777305
OG0000532	354	6	5	6	7	7	8	7	7	6	6	6	2	7	6	6	7	6	6	7	6	6	3	5	4	15	5	2	5	5	4	5	0.015	0.855941	0.594718	0.721613	0.442944	0.66686	0.108472	0.399654	0.434505	0.548424	0.512822	0.649148	0.000608	0.222877	0.561649	0.698343	0.136482
OG0000544	364	5	7	5	4	7	10	8	5	5	5	5	4	5	5	5	4	5	5	5	5	5	20	1	6	7	5	2	5	4	1	4	0.0001	0.839273	0.10414	0.697969	0.608768	0.283578	0.034144	0.055897	0.860362	0.540866	0.510719	0.629747	0.391267	0.749318	0.552217	0.675585	0.270185
OG0000744	511	5	3	4	2	7	5	5	8	4	4	4	4	5	5	6	6	6	5	4	4	4	3	9	5	8	5	2	5	4	2	4	0.0183	0.285654	0.5075	0.670307	0.199136	0.01491	0.629747	0.302254	0.009901	0.533111	0.508603	0.60847	0.391267	0.749318	0.552217	0.698343	0.698343
OG0000766	525	6	3	5	3	3	7	5	6	5	5	5	6	5	5	6	5	5	5	6	5	5	6	4	5	8	5	2	5	4	1	4	0.0048	0.337518	0.192783	0.697969	0.248093	0.005286	0.01491	0.846908	0.389852	0.540866	0.510719	0.629747	0.190333	0.749318	0.552217	0.114925	0.675585
OG0000869	595	3	3	4	7	3	6	4	4	4	4	4	2	8	5	6	6	6	5	4	4	4	3	9	5	7	5	2	5	4	2	4	0.0006	0.5075	0.5075	0.670307	0.050557	0.16458	0.009819	0.824778	0.840469	0.533111	0.508603	0.60847	0.003521	0.009412	0.552217	0.698343	0.698343
OG0000901	619	2	2	3	1	2	3	3	3	3	3	3	5	15	6	6	6	6	6	4	4	4	9	6	6	5	5	2	5	4	5	4	0.0006	0.440855	0.440855	0.637804	0.144205	0.128423	0.585106	0.791855	0.810177	0.525153	0.506474	0.16458	0.433673	0	0.561649	0.698343	0.698343
OG0001133	793	1	1	1	1	2	2	2	1	2	2	2	3	3	3	3	4	3	3	3	2	2	23	3	7	6	5	2	5	2	1	2	0.0006	0.644064	0.644064	0.149344	0.404097	0.559421	0.559421	0.739903	0.396211	0.516986	0.50433	0.559421	0.683116	0.683116	0.53238	0.61971	0.069966
OG0000253	140	15	12	12	14	7	9	9	14	11	11	11	5	6	6	7	6	6	6	15	10	10	4	10	7	9	8	10	8	8	1	7	0	0.123224	0.902524	0.268025	0.155166	0.016885	0.697872	0.39429	0.148222	0.583445	0.52313	0.151389	0.433673	0.772977	0.561649	0.136482	0.698343
OG0000769	528	2	2	3	2	2	4	3	3	3	3	3	4	2	3	3	3	3	3	10	3	3	16	8	10	6	8	10	8	3	1	3	0.0006	0.440855	0.440855	0.637804	0.498896	0.128423	0.047362	0.791855	0.810177	0.525153	0.506474	0.585106	0.118466	0.279572	0.53238	0.61971	0.61971
OG0000815	563	1	2	3	1	3	5	4	5	4	4	4	2	4	3	2	1	2	3	5	4	4	6	6	7	9	8	10	8	7	13	8	0.0041	0.048657	0.440855	0.260933	0.025543	0.16458	0.062964	0.824778	0.335112	0.533111	0.508603	0.60847	0.279572	0.118466	0.53238	0.585379	0.128168
OG0000379	237	6	6	8	10	7	10	9	16	9	9	9	7	7	8	10	11	10	8	22	9	9	0	1	1	1	2	3	2	5	1	5	0.0001	0.298384	0.298384	0.43908	0.536203	0.016885	0.137407	0.890895	0.003396	0.56997	0.519047	0.697872	0.500173	0.500173	0.579599	0.765103	0.215292
OG0000737	507	4	4	5	3	4	6	5	7	5	5	5	6	6	6	5	6	6	6	16	6	6	2	2	2	2	2	3	2	5	5	5	0.0444	0.55685	0.55685	0.697969	0.248093	0.197925	0.078376	0.846908	0.137814	0.540866	0.510719	0.228721	0.772977	0.772977	0.561649	0.307554	0.698343
OG0002142	1525	3	2	2	2	2	3	2	3	2	2	2	1	1	2	7	2	2	2	4	2	2	1	2	2	2	2	3	2	2	1	2	0.0067	0.154062	0.729234	0.599453	0.765192	0.559421	0.031623	0.739903	0.185667	0.516986	0.50433	0.559421	0.20519	0.20519	0.52195	1e-06	0.585379
OG0002322	1651	2	2	3	3	7	2	4	3	3	3	3	1	2	2	1	4	2	2	3	3	3	1	2	2	0	2	3	2	3	5	3	0.0037	0.440855	0.440855	0.637804	0.814454	0.000395	0.003285	0.238877	0.810177	0.525153	0.506474	0.585106	0.20519	0.636472	0.52195	0.128168	0.005285
OG0003397	2369	1	3	2	1	2	1	2	2	2	2	2	1	1	1	1	0	1	1	1	2	2	1	10	3	1	2	3	2	2	2	2	0.0467	0.347221	0.154062	0.599453	0.404097	0.559421	0.089163	0.739903	0.760273	0.516986	0.50433	0.559421	0.576855	0.576855	0.511161	0.545784	0.068126
OG0003580	2492	2	1	2	2	2	1	2	3	2	2	2	1	0	1	0	4	1	1	4	2	2	1	1	1	2	2	3	2	2	3	2	0.0156	0.729234	0.347221	0.599453	0.765192	0.559421	0.089163	0.739903	0.185667	0.516986	0.50433	0.559421	0.576855	0.11368	0.511161	0.068126	5.1e-05
OG0000259	145	11	6	10	6	6	10	9	13	10	10	10	9	9	9	9	9	9	9	28	10	10	5	4	5	10	6	3	6	9	8	9	0.0001	0.502248	0.031242	0.78782	0.055827	0.001316	0.137407	0.698371	0.130346	0.576793	0.521095	0.711456	0.82128	0.82128	0.588139	0.751372	0.751372
OG0000271	155	8	9	10	8	7	13	10	12	10	10	10	10	9	9	7	6	7	9	23	10	10	6	2	5	11	6	3	6	9	7	9	0.0001	0.352445	0.686459	0.78782	0.415285	0.001798	0.004902	0.896996	0.287356	0.576793	0.521095	0.711456	0.306911	0.82128	0.588139	0.718304	0.341012
OG0000326	195	9	6	8	6	6	10	8	12	8	8	8	7	8	8	7	8	8	8	14	8	8	8	4	6	10	6	3	6	8	9	8	0.0386	0.45067	0.298384	0.759424	0.36108	0.013512	0.034144	0.883526	0.053452	0.56297	0.516985	0.683051	0.500173	0.808091	0.579599	0.371066	0.735868
OG0000363	223	12	7	8	7	6	9	8	11	8	8	8	6	6	6	6	6	6	6	12	8	8	5	5	5	10	6	3	6	7	4	7	0.0494	0.032729	0.649056	0.759424	0.691827	0.013512	0.123096	0.883526	0.093912	0.56297	0.516985	0.683051	0.772977	0.772977	0.561649	0.698343	0.698343
OG0000479	311	5	7	6	5	5	9	7	7	6	6	6	5	7	5	5	5	5	5	7	6	6	4	3	4	19	6	3	6	5	3	5	0.0036	0.594718	0.38143	0.721613	0.643204	0.010433	0.027188	0.399654	0.434505	0.548424	0.512822	0.649148	0.749318	0.074833	0.552217	0.675585	0.675585
OG0000173	83	9	7	9	7	6	10	9	13	10	10	10	12	10	11	11	14	12	11	14	10	10	28	11	16	15	13	8	12	9	7	9	0.0002	0.885942	0.326817	0.463582	0.20556	0.001316	0.137407	0.698371	0.130346	0.576793	0.521095	0.711456	0.352802	0.569679	0.604401	0.465063	0.116332
OG0000023	2	35	23	33	31	23	38	31	50	35	35	35	29	26	30	37	30	32	30	60	35	35	59	43	42	14	31	25	31	33	30	33	0.001	0.515896	0.002634	0.382046	0.359016	2e-06	5.5e-05	0.313832	0.000563	0.702491	0.568235	0.857733	0.738279	0.066766	0.716765	0.010691	0.317608
OG0000251	138	9	5	9	7	9	12	10	13	10	10	10	0	16	12	15	16	15	12	13	10	10	10	9	9	9	9	11	9	8	2	7	0	0.885942	0.024042	0.463582	0.20556	0.330764	0.049215	0.896996	0.130346	0.576793	0.521095	0.711456	0	0.014279	0.612143	0.814531	0.296755
OG0000344	210	5	10	7	9	3	4	4	6	7	7	7	9	10	10	12	15	12	10	5	7	7	17	9	11	5	9	11	9	7	6	7	0.0036	0.266775	0.08997	0.741913	0.211802	0.16458	0.60847	0.058419	0.664173	0.55579	0.51491	0.66686	0.54954	0.832372	0.596403	0.788184	0.02022
OG0000147	66	18	10	14	11	8	15	12	24	14	14	14	15	15	15	17	14	15	15	22	14	14	2	3	3	3	4	5	4	9	2	8	0.0001	0.100487	0.065045	0.82655	0.284282	0.000239	0.007788	0.451491	0.000577	0.602425	0.529157	0.755654	0.868489	0.868489	0.633924	0.07902	0.515919
OG0000174	84	6	7	8	9	13	7	10	9	9	9	9	0	6	5	4	5	5	5	18	9	9	12	15	15	35	18	20	17	10	10	10	0.0003	0.298384	0.649056	0.43908	0.901622	0.004902	0.001798	0.495801	0.899629	0.56997	0.519047	0.697872	5e-06	0.190333	0.552217	0.270185	0.675585
OG0000154	70	7	15	12	14	12	16	14	30	13	13	13	9	9	9	7	9	9	9	11	11	11	19	9	12	8	10	12	10	8	1	7	0.0001	0.015452	0.123224	0.523243	0.610236	0.037211	0.082066	0.57456	0	0.596257	0.527161	0.057179	0.82128	0.82128	0.588139	0.03491	0.751372
OG0000157	71	13	9	12	7	10	13	12	15	12	12	12	13	10	12	13	12	12	12	20	12	12	12	6	9	12	10	12	10	11	9	11	0.0186	0.542074	0.188688	0.809565	0.03133	0.028488	0.178332	0.906602	0.16562	0.589932	0.525152	0.735383	0.373163	0.221608	0.612143	0.250074	0.788184
OG0000293	170	5	3	6	7	6	8	7	10	7	7	7	16	8	10	9	13	10	10	9	7	7	19	10	12	8	10	12	10	6	2	6	0.0001	0.594718	0.036372	0.380748	0.887207	0.257201	0.108472	0.874381	0.075977	0.55579	0.51491	0.66686	0.000226	0.183677	0.596403	0.422639	0.013254
OG0000118	49	3	18	13	19	18	25	20	13	14	14	14	25	22	19	13	12	13	17	15	14	14	11	10	9	4	7	4	7	9	1	8	0.0001	2e-06	0.032534	0.539501	0.068204	0.132703	0.000471	0.017041	0.763949	0.602425	0.529157	0.755654	0.002984	0.079891	0.020696	0.797918	0.483512
OG0000130	52	18	12	15	13	14	19	16	20	15	15	15	7	14	13	15	14	14	13	25	15	15	5	6	6	13	7	4	7	11	6	10	0.0001	0.165561	0.23862	0.833682	0.508488	0.046522	0.015556	0.602421	0.072788	0.608441	0.53114	0.764629	0.000262	0.392004	0.619639	0.281894	0.806658
OG0000286	166	7	5	7	6	5	7	6	9	8	8	8	10	13	11	11	11	11	11	17	9	9	10	7	8	9	7	4	7	8	7	8	0.0378	0.868419	0.266775	0.411633	0.36108	0.228721	0.093557	0.316852	0.502237	0.56297	0.516985	0.308042	0.569679	0.112379	0.604401	0.777305	0.777305
OG0000290	168	9	9	10	9	7	12	10	15	10	10	10	2	9	9	10	10	10	9	14	10	10	5	6	6	9	7	4	7	9	7	9	0.0001	0.686459	0.686459	0.78782	0.724959	0.001798	0.049215	0.896996	0.029509	0.576793	0.521095	0.711456	0	0.82128	0.588139	0.765103	0.765103
OG0000301	176	15	9	10	8	8	10	9	12	9	9	9	6	7	7	5	7	7	7	20	9	9	7	7	7	9	7	4	7	7	1	6	0.0001	0.016287	0.686459	0.228104	0.709789	0.308042	0.137407	0.890895	0.112157	0.56997	0.519047	0.697872	0.469541	0.792239	0.570772	0.022236	0.718304
OG0000339	206	9	7	8	6	6	12	9	12	8	8	8	5	7	7	7	7	7	7	15	8	8	13	4	7	8	7	4	7	7	4	7	0	0.45067	0.649056	0.759424	0.36108	0.001316	0.003723	0.468625	0.053452	0.56297	0.516985	0.683051	0.058999	0.792239	0.570772	0.718304	0.718304
OG0000649	444	11	4	5	2	2	3	3	5	4	4	4	2	2	2	2	2	2	2	6	4	4	32	6	11	5	7	4	7	4	2	4	0.0001	0.000595	0.55685	0.109444	0.199136	0.128423	0.585106	0.524334	0.335112	0.533111	0.508603	0.60847	0.636472	0.636472	0.52195	0.585379	0.585379
OG0000310	183	5	12	9	11	5	13	9	22	9	9	9	11	22	16	25	16	18	16	2	8	8	0	0	0	1	1	0	1	4	1	4	0.0001	0.024042	0.079578	0.774602	0.27034	7.4e-05	0.000262	0.890895	3e-06	0.56997	0.519047	0.123096	0.003486	0.001537	0.640731	2.8e-05	0.188016
OG0000311	184	5	16	11	33	8	12	10	11	11	11	11	9	9	9	7	8	8	9	6	9	9	0	1	1	1	1	0	1	7	6	7	0.0002	0.001704	0.021161	0.799389	0	0.020523	0.049215	0.712597	0.909811	0.583445	0.52313	0.041513	0.82128	0.82128	0.588139	0.371066	0.735868
OG0000316	188	0	12	9	15	10	15	12	13	10	10	10	8	18	14	15	25	16	14	4	9	9	0	0	0	1	1	0	1	5	1	5	0.0001	0	0.079578	0.463582	0.032226	0.028488	0.007788	0.25255	0.130346	0.576793	0.521095	0.137407	0.000371	0.021345	0.626896	0.530209	0
OG0000492	322	1	1	1	1	1	3	2	3	2	2	2	26	20	21	27	22	23	21	3	3	3	0	1	1	2	1	0	1	3	2	3	0.0001	0.644064	0.644064	0.149344	0.404097	0.089163	0.031623	0.739903	0.185667	0.516986	0.50433	0.128423	0.016267	0.687316	0.671718	0.018029	0.605347
OG0000509	338	10	5	8	7	6	11	8	11	8	8	8	6	4	6	5	6	6	6	11	8	8	0	0	0	1	1	0	1	8	11	8	0.0153	0.186141	0.065054	0.759424	0.691827	0.013512	0.002721	0.883526	0.093912	0.56297	0.516985	0.683051	0.772977	0.045685	0.561649	0.307554	0.698343
OG0000670	459	12	2	5	6	4	2	4	2	5	5	5	15	17	13	11	12	12	12	2	5	5	1	1	1	1	1	0	1	4	4	4	0	0.000213	0.023978	0.697969	0.398322	0.60847	0.003285	0.572743	0.03936	0.540866	0.510719	0.629747	0.139185	0.017651	0.06667	0.465063	0.788184
OG0000786	540	10	6	6	7	5	9	7	9	6	6	6	4	4	4	5	3	4	4	5	5	5	0	1	1	2	1	0	1	4	3	4	0.0204	0.015935	0.855941	0.721613	0.442944	0.010433	0.027188	0.399654	0.100455	0.548424	0.512822	0.078376	0.719948	0.719948	0.542465	0.092721	0.228313
OG0000794	547	5	6	6	12	4	6	5	5	6	6	6	6	6	7	9	9	9	7	6	6	6	0	1	1	0	1	0	1	3	1	3	0.0107	0.594718	0.855941	0.721613	0.003445	0.197925	0.078376	0.609631	0.63684	0.548424	0.512822	0.649148	0.469541	0.469541	0.570772	0.751372	0.751372
OG0000876	600	8	4	5	5	4	7	5	8	5	5	5	3	2	3	3	2	3	3	16	5	5	0	1	1	0	1	0	1	3	1	3	0	0.048206	0.55685	0.697969	0.863415	0.197925	0.01491	0.846908	0.073135	0.540866	0.510719	0.629747	0.683116	0.279572	0.53238	0.61971	0.181245
OG0000935	644	2	6	4	7	3	2	3	5	4	4	4	7	11	9	9	15	10	9	2	4	4	0	0	0	2	1	0	1	4	4	4	0.0001	0.15032	0.076569	0.670307	0.050557	0.585106	0.128423	0.524334	0.335112	0.533111	0.508603	0.60847	0.163444	0.085395	0.588139	0.422639	0.000151
OG0000977	677	5	3	5	3	3	6	5	7	5	5	5	6	5	6	5	7	6	6	11	5	5	1	0	1	1	1	0	1	4	3	4	0.0179	0.839273	0.192783	0.697969	0.248093	0.005286	0.078376	0.846908	0.137814	0.540866	0.510719	0.629747	0.772977	0.433673	0.561649	0.307554	0.136482
OG0000981	681	6	5	5	4	3	7	5	7	5	5	5	5	5	5	3	6	5	5	1	5	5	1	0	1	0	1	0	1	5	9	5	0.0079	0.337518	0.839273	0.697969	0.608768	0.005286	0.01491	0.846908	0.137814	0.540866	0.510719	0.629747	0.749318	0.749318	0.552217	0.011642	0.114925
OG0001011	705	7	8	6	5	7	8	7	11	6	6	6	2	1	2	1	1	1	2	6	5	5	0	2	1	3	1	0	1	3	1	3	0.0036	0.38143	0.132156	0.721613	0.643204	0.66686	0.108472	0.399654	0.007273	0.548424	0.512822	0.078376	0.636472	0.20519	0.52195	0.545784	0.545784
OG0001090	758	5	4	5	5	3	7	5	3	5	5	5	3	4	4	3	4	4	4	13	5	5	0	1	1	2	1	0	1	4	4	4	0.0066	0.839273	0.55685	0.697969	0.863415	0.005286	0.01491	0.846908	0.240163	0.540866	0.510719	0.629747	0.340635	0.719948	0.542465	0.228313	0.649559
OG0001165	819	5	2	4	2	4	4	4	24	4	4	4	4	2	3	2	2	2	3	4	4	4	1	1	1	1	1	0	1	4	4	4	0.0001	0.285654	0.15032	0.670307	0.199136	0.60847	0.60847	0.824778	0	0.533111	0.508603	0.60847	0.118466	0.279572	0.53238	0.585379	0.585379
OG0001267	895	5	4	4	4	3	8	5	6	4	4	4	2	2	2	3	2	2	2	6	4	4	1	2	1	2	1	0	1	3	2	3	0.0152	0.285654	0.815995	0.670307	0.844061	0.005286	0.000742	0.302254	0.102955	0.533111	0.508603	0.60847	0.636472	0.636472	0.52195	0.046794	0.585379
OG0001317	929	7	4	4	7	2	6	4	4	4	4	4	4	5	4	6	2	4	4	4	4	4	0	0	0	3	1	0	1	3	2	3	0.0011	0.029965	0.815995	0.670307	0.050557	0.003285	0.009819	0.824778	0.840469	0.533111	0.508603	0.60847	0.719948	0.155479	0.542465	0.020376	0.007369
OG0001325	936	2	4	4	4	3	5	4	8	4	4	4	9	1	4	5	4	4	4	3	4	4	0	3	1	1	1	0	1	3	1	3	0.0001	0.15032	0.815995	0.670307	0.844061	0.16458	0.062964	0.824778	0.009901	0.533111	0.508603	0.60847	0.000102	0.00177	0.542465	0.092721	0.649559
OG0001358	960	11	12	8	5	3	3	3	4	4	4	4	5	2	3	2	4	3	3	0	3	3	0	0	0	1	1	0	1	3	2	3	0.0005	0.111543	0.032729	0.000137	0.343296	0.585106	0.585106	0.524334	0.840469	0.533111	0.508603	0.047362	0.032188	0.279572	0.53238	0.181245	0.069966
OG0001481	1050	10	3	4	3	3	5	4	5	4	4	4	4	3	3	3	3	3	3	6	4	4	0	1	1	1	1	0	1	3	1	3	0.0339	0.00026	0.5075	0.670307	0.562934	0.16458	0.062964	0.824778	0.335112	0.533111	0.508603	0.60847	0.118466	0.683116	0.53238	0.61971	0.61971
OG0001758	1244	3	3	3	4	2	4	3	7	3	3	3	2	3	2	2	2	2	2	10	3	3	1	0	1	0	1	0	1	3	2	3	0.0393	0.781861	0.781861	0.637804	0.274992	0.128423	0.047362	0.791855	0.004928	0.525153	0.506474	0.585106	0.636472	0.079663	0.52195	0.585379	0.585379
OG0001813	1284	1	6	3	6	4	2	3	2	3	3	3	5	2	4	4	4	4	4	3	3	3	0	1	1	3	1	0	1	2	1	2	0.0069	0.048657	0.015338	0.637804	0.026934	0.047362	0.128423	0.791855	0.491041	0.525153	0.506474	0.585106	0.155479	0.021864	0.542465	0.649559	0.649559
OG0001815	1286	1	3	2	2	2	2	2	2	2	2	2	7	6	6	4	9	6	6	4	2	2	2	0	1	1	1	0	1	2	1	2	0.0148	0.347221	0.154062	0.599453	0.765192	0.559421	0.559421	0.739903	0.760273	0.516986	0.50433	0.559421	0.222877	0.772977	0.561649	0.016633	0.003646
OG0001826	1293	1	3	3	1	3	6	4	4	3	3	3	4	4	4	7	7	7	4	2	3	3	0	1	1	1	1	0	1	2	1	2	0.0121	0.048657	0.781861	0.637804	0.144205	0.16458	0.009819	0.238877	0.267687	0.525153	0.506474	0.585106	0.719948	0.719948	0.542465	0.718304	0.718304
OG0001861	1319	4	4	4	3	2	8	4	7	4	4	4	2	2	2	2	2	2	2	2	3	3	1	0	1	0	1	0	1	3	2	3	0.0096	0.815995	0.815995	0.670307	0.562934	0.003285	1.6e-05	0.824778	0.047193	0.533111	0.508603	0.047362	0.636472	0.636472	0.52195	0.585379	0.585379
OG0001865	1323	6	3	3	3	3	5	4	8	3	3	3	1	1	1	1	1	1	1	2	2	2	1	2	1	3	1	0	1	2	1	2	0.0475	0.015338	0.781861	0.637804	0.814454	0.16458	0.062964	0.238877	0.001262	0.525153	0.506474	0.031623	0.576855	0.576855	0.511161	0.545784	0.545784
OG0001950	1382	3	2	3	2	2	1	2	3	3	3	3	3	2	2	2	2	2	2	4	3	3	1	0	1	0	1	0	1	5	20	7	0.013	0.781861	0.440855	0.637804	0.498896	0.559421	0.089163	0.458252	0.810177	0.525153	0.506474	0.585106	0.079663	0.636472	0.52195	0.585379	0.585379
OG0002541	1801	2	1	2	4	3	2	2	2	2	2	2	1	5	3	4	3	3	3	1	2	2	2	0	1	1	1	0	1	2	1	2	0.0369	0.729234	0.347221	0.599453	0.079605	0.031623	0.559421	0.739903	0.760273	0.516986	0.50433	0.559421	0.012219	0.032188	0.53238	0.069966	0.61971
OG0002548	1802	2	4	2	0	6	1	2	2	2	2	2	4	2	2	1	3	2	2	2	2	2	1	0	1	5	1	0	1	2	1	2	0.0001	0.729234	0.053162	0.599453	0.035782	2e-06	0.089163	0.739903	0.760273	0.516986	0.50433	0.559421	0.014969	0.636472	0.52195	0.128168	0.046794
OG0003260	2290	2	1	2	1	2	1	2	1	2	2	2	3	2	3	3	11	4	3	1	2	2	1	0	1	1	1	0	1	2	2	2	0.0006	0.729234	0.347221	0.599453	0.404097	0.559421	0.089163	0.739903	0.396211	0.516986	0.50433	0.559421	0.683116	0.279572	0.53238	0.228313	0
OG0003262	2292	2	2	2	3	2	2	2	4	2	2	2	1	6	2	3	1	2	2	1	2	2	0	0	0	1	1	0	1	2	1	2	0.0407	0.729234	0.729234	0.599453	0.191135	0.559421	0.559421	0.739903	0.07543	0.516986	0.50433	0.559421	0.20519	8.9e-05	0.52195	0.046794	0.128168
OG0003566	2482	6	1	1	1	1	1	1	1	1	1	1	1	1	1	1	1	1	1	5	1	1	0	4	1	4	1	0	1	1	1	1	0.0278	4.5e-05	0.644064	0.554022	0.6758	0.531151	0.531151	0.653052	0.671201	0.508604	0.502172	0.531151	0.576855	0.576855	0.511161	0.545784	0.545784
OG0003660	2550	2	1	2	11	1	1	1	2	2	2	2	1	1	1	1	2	1	1	1	1	1	1	0	1	2	1	0	1	1	1	1	0.0197	0.729234	0.347221	0.599453	1e-06	0.531151	0.531151	0.363929	0.760273	0.516986	0.50433	0.01581	0.576855	0.576855	0.511161	0.545784	0.02339
OG0003674	2559	0	12	1	0	3	0	1	0	1	1	1	1	0	1	0	0	0	1	0	1	1	2	0	1	1	1	0	1	3	11	4	0	0.209991	0	0.554022	0.254217	0.0005	0.046475	0.653052	0.247864	0.508604	0.502172	0.531151	0.576855	0.11368	0.511161	0.5	0.5
OG0003740	2601	3	1	2	1	1	1	1	3	2	2	2	2	3	3	8	2	3	3	1	2	2	0	0	0	1	1	0	1	2	2	2	0.0182	0.154062	0.347221	0.599453	0.404097	0.531151	0.531151	0.363929	0.185667	0.516986	0.50433	0.559421	0.279572	0.683116	0.53238	2e-06	0.181245
OG0003814	2657	1	1	1	1	1	1	1	2	1	1	1	9	1	1	1	1	1	1	1	1	1	1	1	1	1	1	0	1	1	1	1	0.0165	0.644064	0.644064	0.554022	0.6758	0.531151	0.531151	0.653052	0.091158	0.508604	0.502172	0.531151	0	0.576855	0.511161	0.545784	0.545784
OG0004015	2786	5	0	2	0	4	2	2	2	2	2	2	1	3	2	2	3	2	2	3	2	2	0	0	0	1	1	0	1	2	1	2	0.0122	0.005817	0.021962	0.599453	0.035782	0.00244	0.559421	0.739903	0.760273	0.516986	0.50433	0.559421	0.20519	0.079663	0.52195	0.585379	0.046794
OG0004210	2926	1	1	1	1	1	7	3	2	2	2	2	1	1	1	1	1	1	1	2	2	2	1	0	1	1	1	0	1	2	2	2	0.028	0.644064	0.644064	0.149344	0.404097	0.001716	7e-06	0.164412	0.760273	0.516986	0.50433	0.559421	0.576855	0.576855	0.511161	0.545784	0.545784
OG0004351	3025	1	1	1	1	1	5	2	2	2	2	2	3	1	2	1	2	2	2	1	2	2	1	2	1	1	1	0	1	2	3	2	0.0408	0.644064	0.644064	0.149344	0.404097	0.089163	6e-05	0.739903	0.760273	0.516986	0.50433	0.559421	0.079663	0.20519	0.52195	0.128168	0.585379
OG0004833	3364	1	1	1	1	1	5	2	3	1	1	1	0	2	1	2	1	1	1	1	1	1	1	1	1	2	1	0	1	1	1	1	0.008	0.644064	0.644064	0.554022	0.6758	0.089163	6e-05	0.081169	0.017236	0.508604	0.502172	0.531151	0.11368	0.039773	0.511161	0.02339	0.545784
OG0004887	3384	4	1	2	0	1	3	2	8	2	2	2	0	0	0	0	1	1	1	1	1	1	0	1	1	0	1	0	1	1	1	1	0.0004	0.053162	0.347221	0.599453	0.035782	0.089163	0.031623	0.739903	0.000109	0.516986	0.50433	0.01581	0.5	0.5	0.01671	0.068126	0.545784
OG0004891	3385	1	1	1	0	0	1	1	3	1	1	1	4	3	3	3	1	3	3	5	2	2	0	0	0	1	1	0	1	2	1	2	0.0317	0.644064	0.644064	0.554022	0.254217	0.046475	0.531151	0.653052	0.017236	0.508604	0.502172	0.089163	0.118466	0.683116	0.53238	0.61971	0.003932
OG0007371	5179	3	0	1	0	5	0	1	1	1	1	1	0	0	0	2	3	2	1	1	1	1	1	0	1	0	1	0	1	1	1	1	0.0001	0.011913	0.209991	0.554022	0.254217	1e-06	0.046475	0.653052	0.671201	0.508604	0.502172	0.531151	0.5	0.5	0.01671	0.585379	0.046794
OG0009785	6406	1	0	1	0	3	0	1	2	1	1	1	2	0	1	1	1	1	1	1	1	1	1	0	1	0	1	0	1	1	1	1	0.0245	0.644064	0.209991	0.554022	0.254217	0.0005	0.046475	0.653052	0.091158	0.508604	0.502172	0.531151	0.039773	0.11368	0.511161	0.545784	0.545784
OG0010111	6433	1	0	1	0	5	0	1	0	1	1	1	1	0	1	0	2	1	1	0	1	1	1	0	1	0	1	0	1	2	3	2	0.0002	0.644064	0.209991	0.554022	0.254217	1e-06	0.046475	0.653052	0.247864	0.508604	0.502172	0.531151	0.576855	0.11368	0.511161	0.068126	0.02339
OG0011105	6458	0	0	0	2	0	4	1	0	1	1	1	0	0	0	0	0	0	0	1	1	1	0	0	0	2	1	0	1	1	1	1	0.0262	0.5	0.5	0.080261	0.093689	0.046475	1.6e-05	0.653052	0.247864	0.508604	0.502172	0.531151	0.5	0.5	0.5	0.5	0.5
OG0000060	18	14	17	18	22	21	19	20	28	20	20	20	22	20	20	19	20	20	20	25	20	20	49	9	22	12	19	22	19	16	5	14	0.001	0.145453	0.767045	0.248974	0.463503	0.272268	0.489781	0.928502	0.012242	0.636379	0.540865	0.800503	0.224859	0.888346	0.665903	0.57757	0.84427
OG0000090	36	14	15	14	13	9	24	15	13	14	14	14	12	11	12	11	15	12	12	19	14	14	25	17	20	21	19	22	19	15	16	15	0.0001	0.910209	0.573843	0.82655	0.768203	3e-06	0	0.589189	0.763949	0.602425	0.529157	0.755654	0.849897	0.58748	0.612143	0.465063	0.02022
OG0000135	55	14	10	13	10	10	16	13	12	13	13	13	16	13	14	14	15	14	14	25	13	13	10	10	10	11	11	13	11	11	5	10	0.0002	0.558796	0.206117	0.81856	0.26643	0.00379	0.009489	0.910484	0.754904	0.596257	0.527161	0.745931	0.152316	0.617546	0.626896	0.806658	0.281894
OG0000321	192	5	4	5	5	5	10	7	7	6	6	6	5	5	5	5	8	5	5	11	6	6	25	7	13	13	11	13	11	5	1	5	0.0001	0.839273	0.55685	0.345833	0.643204	0.010433	0.001894	0.399654	0.434505	0.548424	0.512822	0.649148	0.749318	0.749318	0.552217	0.675585	0.002233
OG0000215	115	13	12	11	10	11	14	12	20	11	11	11	10	7	8	7	8	8	8	10	10	10	2	3	3	7	5	6	5	9	7	9	0.0343	0.257007	0.523358	0.799389	0.737985	0.371586	0.065343	0.540019	0.000606	0.583445	0.52313	0.151389	0.072131	0.500173	0.579599	0.371066	0.735868
OG0000252	139	10	6	9	6	6	10	8	12	9	9	9	10	13	12	14	11	12	12	19	10	10	4	7	5	3	5	6	5	9	8	9	0.0008	0.478233	0.131993	0.774602	0.18267	0.013512	0.034144	0.681824	0.112157	0.56997	0.519047	0.330764	0.221608	0.373163	0.612143	0.116332	0.465063
OG0000364	224	6	5	6	5	5	8	7	9	7	7	7	10	10	10	11	10	10	10	16	8	8	6	1	4	5	5	6	5	7	6	7	0.011	0.855941	0.594718	0.380748	0.328372	0.010433	0.108472	0.874381	0.204184	0.55579	0.51491	0.283578	0.832372	0.832372	0.596403	0.215292	0.765103
OG0000407	260	7	5	6	4	5	10	7	9	6	6	6	5	6	6	9	9	8	6	11	6	6	2	4	4	11	5	6	5	5	2	5	0.0001	0.38143	0.594718	0.721613	0.290969	0.010433	0.001894	0.399654	0.100455	0.548424	0.512822	0.649148	0.433673	0.772977	0.561649	0.177424	0.177424
OG0000484	314	3	13	8	14	5	7	6	11	8	8	8	4	5	5	6	5	5	5	10	7	7	10	1	5	4	5	6	5	6	4	6	0	0.002099	0.008513	0.759424	0.005521	0.228721	0.093557	0.316852	0.093912	0.56297	0.516985	0.108472	0.391267	0.749318	0.552217	0.114925	0.675585
OG0000939	648	2	3	3	3	3	5	4	6	3	3	3	2	3	3	3	3	3	3	4	3	3	17	3	7	3	5	6	5	3	3	3	0.0107	0.440855	0.781861	0.637804	0.814454	0.16458	0.062964	0.238877	0.024996	0.525153	0.506474	0.585106	0.279572	0.683116	0.53238	0.61971	0.61971
OG0001252	880	3	2	3	5	2	6	3	4	3	3	3	1	3	3	4	2	3	3	3	3	3	1	5	4	9	5	6	5	3	2	3	0.0007	0.781861	0.440855	0.637804	0.072605	0.128423	0.000176	0.791855	0.267687	0.525153	0.506474	0.585106	0.012219	0.683116	0.53238	0.069966	0.181245
OG0000446	290	1	6	5	3	4	8	6	5	5	5	5	9	11	8	6	7	7	8	5	5	5	31	8	13	5	8	5	8	5	4	5	0.0001	0.001964	0.337518	0.697969	0.248093	0.00768	0.020741	0.355305	0.860362	0.540866	0.510719	0.629747	0.281069	0.028322	0.579599	0.341012	0.718304
OG0000280	161	14	7	10	10	7	12	10	13	10	10	10	11	10	11	10	12	11	11	18	10	10	2	5	3	3	3	1	3	7	4	7	0.0002	0.053687	0.151553	0.78782	0.906996	0.001798	0.049215	0.896996	0.130346	0.576793	0.521095	0.711456	0.841801	0.569679	0.604401	0.444851	0.233063
OG0000330	198	9	7	9	8	7	9	8	14	9	9	9	9	10	10	11	9	10	10	15	9	9	2	2	2	9	3	1	3	6	2	6	0.0015	0.885942	0.326817	0.774602	0.709789	0.283578	0.123096	0.681824	0.022483	0.56997	0.519047	0.697872	0.54954	0.832372	0.596403	0.215292	0.422639
OG0000392	248	5	6	7	7	7	13	9	11	8	8	8	5	7	7	10	6	7	7	24	8	8	1	7	3	4	3	1	3	5	1	5	0.0001	0.266775	0.624692	0.411633	0.691827	0.016885	0.000262	0.468625	0.093912	0.56297	0.516985	0.683051	0.058999	0.792239	0.570772	0.00546	0.341012
OG0000528	352	7	6	6	6	6	10	7	8	6	6	6	4	6	6	7	7	7	6	10	6	6	1	3	2	7	3	1	3	4	2	4	0.0058	0.38143	0.855941	0.721613	0.877033	0.257201	0.001894	0.399654	0.171901	0.548424	0.512822	0.649148	0.045685	0.772977	0.561649	0.718304	0.718304
OG0000558	373	7	4	5	4	5	9	6	5	5	5	5	6	4	5	6	5	5	5	13	5	5	3	4	3	7	3	1	3	4	2	4	0.001	0.10414	0.55685	0.697969	0.608768	0.228721	0.001238	0.355305	0.860362	0.540866	0.510719	0.629747	0.190333	0.391267	0.552217	0.114925	0.675585
OG0000572	381	16	4	6	6	5	6	6	5	6	6	6	10	9	9	11	10	10	9	2	6	6	3	2	3	5	3	1	3	4	1	4	0	3e-06	0.231646	0.721613	0.877033	0.228721	0.649148	0.862635	0.63684	0.548424	0.512822	0.649148	0.306911	0.82128	0.588139	0.215292	0.765103
OG0000575	383	9	4	6	5	5	6	6	7	6	6	6	5	5	5	5	5	5	5	15	6	6	2	4	3	7	3	1	3	4	2	4	0.0092	0.06859	0.231646	0.721613	0.643204	0.228721	0.649148	0.862635	0.434505	0.548424	0.512822	0.649148	0.749318	0.749318	0.552217	0.675585	0.675585
OG0000576	384	6	5	5	4	5	11	7	7	5	5	5	4	4	4	5	4	4	4	6	5	5	2	4	3	7	3	1	3	4	3	4	0.0094	0.337518	0.839273	0.697969	0.608768	0.010433	0.000107	0.114986	0.137814	0.540866	0.510719	0.629747	0.719948	0.719948	0.542465	0.092721	0.649559
OG0000586	394	7	6	6	5	5	9	7	11	6	6	6	5	6	6	6	6	6	6	8	6	6	2	4	3	4	3	1	3	4	1	4	0.007	0.38143	0.855941	0.721613	0.643204	0.010433	0.027188	0.399654	0.007273	0.548424	0.512822	0.649148	0.433673	0.772977	0.561649	0.698343	0.698343
OG0000641	438	3	2	4	15	2	4	4	19	6	6	6	3	3	4	5	5	5	4	13	6	6	2	8	4	2	3	1	3	5	4	5	0.0001	0.5075	0.15032	0.023083	0.000118	0.003285	0.60847	0.248796	0	0.548424	0.512822	0.649148	0.340635	0.340635	0.542465	0.675585	0.675585
OG0000655	449	3	3	3	1	2	2	2	4	3	3	3	12	10	11	16	12	12	11	6	4	4	9	2	4	3	3	1	3	3	2	3	0.0001	0.781861	0.781861	0.637804	0.144205	0.559421	0.559421	0.458252	0.267687	0.525153	0.506474	0.16458	0.352802	0.569679	0.604401	0.002727	0.788184
OG0001055	733	6	3	4	3	3	4	4	5	4	4	4	5	4	5	5	5	5	5	3	4	4	11	1	4	3	3	1	3	3	1	3	0.0168	0.076569	0.5075	0.670307	0.562934	0.16458	0.60847	0.824778	0.335112	0.533111	0.508603	0.60847	0.749318	0.391267	0.552217	0.675585	0.675585
OG0001103	770	6	4	4	2	2	5	4	12	4	4	4	4	4	4	3	3	3	4	2	4	4	8	1	3	5	3	1	3	4	4	4	0.0007	0.076569	0.815995	0.670307	0.199136	0.003285	0.062964	0.824778	4.5e-05	0.533111	0.508603	0.60847	0.719948	0.719948	0.542465	0.61971	0.61971
OG0001142	801	3	8	4	6	2	5	4	4	4	4	4	4	5	4	5	4	4	4	4	4	4	4	3	3	3	3	1	3	3	1	3	0.0208	0.5075	0.005362	0.670307	0.107707	0.003285	0.062964	0.824778	0.840469	0.533111	0.508603	0.60847	0.719948	0.155479	0.542465	0.092721	0.649559
OG0001209	850	2	3	3	3	3	6	4	4	3	3	3	3	3	3	3	3	3	3	10	3	3	4	1	3	6	3	1	3	3	2	3	0.0217	0.440855	0.781861	0.637804	0.814454	0.16458	0.009819	0.238877	0.267687	0.525153	0.506474	0.585106	0.683116	0.683116	0.53238	0.61971	0.61971
OG0001420	1005	3	4	4	4	3	4	4	5	4	4	4	6	2	4	7	2	4	4	2	4	4	1	7	3	4	3	1	3	3	1	3	0.0002	0.5075	0.815995	0.670307	0.844061	0.16458	0.60847	0.824778	0.335112	0.533111	0.508603	0.60847	0.052645	0.021864	0.542465	0.001211	0.007369
OG0001447	1019	3	2	2	2	5	2	3	3	2	2	2	2	1	2	3	2	2	2	2	2	2	11	7	6	2	3	1	3	2	2	2	0.0224	0.154062	0.729234	0.599453	0.765192	0.005608	0.128423	0.164412	0.185667	0.516986	0.50433	0.559421	0.636472	0.20519	0.52195	0.046794	0.585379
OG0001451	1023	1	3	3	6	2	4	3	2	3	3	3	5	3	3	3	3	3	3	5	3	3	2	4	3	8	3	1	3	3	1	3	0.0125	0.048657	0.781861	0.637804	0.026934	0.128423	0.047362	0.791855	0.491041	0.525153	0.506474	0.585106	0.032188	0.683116	0.53238	0.61971	0.61971
OG0001751	1239	5	2	3	2	2	4	3	4	3	3	3	0	4	3	4	4	4	3	3	3	3	2	3	3	6	3	1	3	3	1	3	0.0049	0.102994	0.440855	0.637804	0.498896	0.128423	0.047362	0.791855	0.267687	0.525153	0.506474	0.585106	0.000681	0.118466	0.53238	0.649559	0.649559
OG0002077	1482	0	1	1	1	2	2	2	5	2	2	2	2	3	3	5	5	5	3	4	2	2	5	3	3	5	3	1	3	2	1	2	0.0288	0.209991	0.644064	0.149344	0.404097	0.559421	0.559421	0.739903	0.009646	0.516986	0.50433	0.559421	0.279572	0.683116	0.53238	0.675585	0.675585
OG0002263	1609	2	1	2	1	1	2	2	3	2	2	2	2	3	2	1	1	1	2	1	2	2	1	5	3	13	3	1	3	2	2	2	0.0259	0.729234	0.347221	0.599453	0.404097	0.089163	0.559421	0.739903	0.185667	0.516986	0.50433	0.559421	0.636472	0.079663	0.52195	0.545784	0.545784
OG0000028	3	28	26	31	25	33	49	39	47	33	33	33	35	34	34	33	32	33	34	54	33	33	12	15	15	23	18	14	18	26	16	24	0.001	0.413071	0.159971	0.3679	0.039529	0.000485	1e-06	0.086307	0.000928	0.694971	0.564736	0.852643	0.601178	0.916103	0.733214	0.883843	0.669693
OG0000109	44	16	13	15	12	11	17	14	24	15	15	15	13	14	14	17	15	15	14	15	15	15	4	6	6	17	9	6	9	16	22	17	0.0011	0.587471	0.449506	0.833682	0.301042	0.00464	0.011355	0.754369	0.002442	0.608441	0.53114	0.764629	0.617546	0.863063	0.626896	0.07902	0.814531
OG0000228	125	18	12	12	2	7	11	9	12	10	10	10	13	13	12	11	13	12	12	10	10	10	11	13	11	8	9	6	9	8	2	7	0.0001	0.008374	0.902524	0.115699	4.7e-05	0.016885	0.041513	0.698371	0.287356	0.576793	0.521095	0.711456	0.373163	0.373163	0.612143	0.465063	0.250074
OG0000229	126	14	9	10	11	10	13	11	11	10	10	10	10	14	11	8	11	10	11	9	10	10	11	9	10	11	9	6	9	8	2	7	0.001	0.053687	0.686459	0.78782	0.55852	0.351899	0.057179	0.51937	0.55104	0.576793	0.521095	0.711456	0.569679	0.054139	0.604401	0.04182	0.215292
OG0000399	254	9	5	7	6	5	8	7	10	7	7	7	8	6	8	8	8	8	8	12	7	7	3	7	5	7	6	7	6	6	3	6	0.0147	0.159678	0.266775	0.741913	0.670117	0.010433	0.108472	0.874381	0.075977	0.55579	0.51491	0.66686	0.808091	0.142463	0.579599	0.735868	0.735868
OG0000438	284	6	5	6	5	4	6	5	7	6	6	6	6	6	6	7	7	7	6	18	6	6	2	7	5	6	6	7	6	6	5	6	0.0126	0.855941	0.594718	0.721613	0.643204	0.197925	0.078376	0.609631	0.434505	0.548424	0.512822	0.649148	0.772977	0.772977	0.561649	0.718304	0.718304
OG0000525	349	7	6	7	7	5	9	7	12	7	7	7	3	3	4	5	4	4	4	8	7	7	2	4	4	11	6	7	6	6	4	6	0.0053	0.868419	0.624692	0.741913	0.887207	0.010433	0.027188	0.874381	0.011256	0.55579	0.51491	0.66686	0.340635	0.340635	0.542465	0.092721	0.649559
OG0000386	244	1	4	4	6	3	8	6	8	6	6	6	2	2	3	9	6	6	4	7	6	6	16	3	9	14	10	7	10	10	20	11	0.0001	0.0137	0.815995	0.023083	0.877033	0.000368	0.020741	0.862635	0.171901	0.548424	0.512822	0.649148	0.279572	0.279572	0.063943	0.003646	0.698343
OG0000114	47	0	22	14	26	27	14	19	25	15	15	15	8	6	8	8	6	8	8	5	11	11	28	13	18	13	15	17	15	11	10	11	0.0001	0	0.002275	0.554327	0.000508	0	0.000138	0.084742	0.0008	0.608441	0.53114	0.000529	0.808091	0.142463	0.579599	0.735868	0.028357
OG0000281	162	8	9	8	7	8	16	10	10	8	8	8	7	6	6	6	6	6	6	16	8	8	7	7	7	7	7	8	7	7	4	7	0.0002	0.878131	0.45067	0.759424	0.691827	0.020523	2e-06	0.202092	0.234222	0.56297	0.516985	0.683051	0.222877	0.772977	0.561649	0.698343	0.698343
OG0000809	557	4	2	3	2	2	4	3	3	3	3	3	2	1	2	2	1	2	2	10	4	4	11	6	8	7	7	8	7	5	7	5	0.0107	0.224621	0.440855	0.637804	0.498896	0.128423	0.047362	0.791855	0.810177	0.525153	0.506474	0.16458	0.636472	0.20519	0.52195	0.585379	0.128168
OG0000100	39	15	11	14	11	9	15	13	22	14	14	14	12	12	12	12	13	12	12	19	14	14	29	11	18	16	17	19	17	14	12	14	0.0002	0.573843	0.222758	0.82655	0.284282	0.000327	0.073654	0.745644	0.00566	0.602425	0.529157	0.755654	0.849897	0.849897	0.612143	0.788184	0.250074
OG0000185	92	14	11	12	8	8	20	13	17	12	12	12	10	11	10	10	6	9	10	24	12	12	2	5	4	5	4	2	4	9	7	9	0.0001	0.277689	0.71408	0.809565	0.118802	2.3e-05	0	0.558278	0.045619	0.589932	0.525152	0.735383	0.832372	0.33077	0.596403	0.196747	0.004062
OG0000217	116	10	10	11	8	7	15	11	17	11	11	11	15	12	13	13	13	13	13	19	11	11	1	1	2	9	4	2	4	9	6	9	0.0001	0.701215	0.701215	0.799389	0.227133	0.000169	0.000529	0.902157	0.012989	0.583445	0.52313	0.723924	0.139185	0.603333	0.619639	0.797918	0.797918
OG0000261	147	12	9	11	9	6	15	11	16	11	11	11	9	9	10	10	10	10	10	27	11	11	1	4	3	6	4	2	4	7	1	6	0.0001	0.523358	0.37562	0.799389	0.437957	1e-05	0.000529	0.902157	0.037274	0.583445	0.52313	0.723924	0.54954	0.54954	0.596403	0.765103	0.765103
OG0000374	233	11	8	9	9	6	9	8	10	9	9	9	8	8	9	10	10	10	9	13	9	9	6	3	4	6	4	2	4	6	3	6	0.0306	0.211248	0.669307	0.774602	0.901622	0.013512	0.123096	0.681824	0.528461	0.56997	0.519047	0.697872	0.526577	0.526577	0.588139	0.765103	0.765103
OG0000449	293	3	6	6	4	4	6	5	7	6	6	6	13	10	11	13	10	11	11	13	7	7	3	4	4	8	4	2	4	5	3	5	0.0008	0.036372	0.855941	0.721613	0.290969	0.197925	0.078376	0.609631	0.434505	0.548424	0.512822	0.257201	0.112379	0.569679	0.604401	0.103513	0.444851
OG0000476	309	11	4	6	4	4	6	5	7	6	6	6	8	8	8	11	9	9	8	12	6	6	7	4	5	5	4	2	4	5	2	5	0.001	0.00358	0.231646	0.721613	0.290969	0.197925	0.078376	0.609631	0.434505	0.548424	0.512822	0.649148	0.808091	0.808091	0.579599	0.077868	0.751372
OG0000485	315	10	4	7	4	6	10	8	9	7	7	7	6	7	7	8	8	8	7	13	7	7	2	4	3	8	4	2	4	5	3	5	0.0008	0.08997	0.050244	0.741913	0.133279	0.013512	0.034144	0.436955	0.204184	0.55579	0.51491	0.66686	0.469541	0.792239	0.570772	0.735868	0.735868
OG0000580	388	5	5	5	5	4	10	6	9	5	5	5	5	4	5	5	6	5	5	4	5	5	4	5	4	6	4	2	4	4	2	4	0.003	0.839273	0.839273	0.697969	0.863415	0.00768	6.2e-05	0.355305	0.017585	0.540866	0.510719	0.629747	0.749318	0.391267	0.552217	0.675585	0.114925
OG0000672	461	5	3	5	3	3	6	5	5	5	5	5	7	7	6	6	6	6	6	17	6	6	8	2	4	3	4	2	4	5	4	5	0.0006	0.839273	0.192783	0.697969	0.248093	0.005286	0.078376	0.846908	0.860362	0.540866	0.510719	0.228721	0.222877	0.222877	0.561649	0.698343	0.698343
OG0000929	640	1	3	3	2	3	5	4	3	3	3	3	7	3	6	8	7	7	6	5	3	3	8	4	5	7	4	2	4	3	2	3	0.0027	0.048657	0.781861	0.637804	0.498896	0.16458	0.062964	0.238877	0.810177	0.525153	0.506474	0.585106	0.222877	0.005964	0.561649	0.157328	0.718304
OG0001043	728	4	1	4	3	1	3	3	4	4	4	4	2	3	3	7	4	4	3	9	4	4	5	3	4	7	4	2	4	4	6	4	0.0023	0.815995	0.0137	0.670307	0.562934	0.001716	0.585106	0.524334	0.840469	0.533111	0.508603	0.60847	0.279572	0.683116	0.53238	0.001211	0.649559
OG0001065	740	7	4	4	4	4	5	4	3	4	4	4	2	2	2	3	2	2	2	6	4	4	3	1	3	12	4	2	4	4	2	4	0.0456	0.029965	0.815995	0.670307	0.844061	0.60847	0.062964	0.824778	0.555548	0.533111	0.508603	0.60847	0.636472	0.636472	0.52195	0.046794	0.585379
OG0001141	800	3	4	4	4	3	7	4	6	4	4	4	3	3	3	2	3	3	3	6	4	4	6	3	4	5	4	2	4	4	2	4	0.0409	0.5075	0.815995	0.670307	0.844061	0.16458	0.000395	0.824778	0.102955	0.533111	0.508603	0.60847	0.683116	0.683116	0.53238	0.181245	0.61971
OG0001366	968	4	4	4	4	2	6	4	4	4	4	4	2	2	2	2	2	2	2	2	3	3	12	1	4	5	4	2	4	3	1	3	0.0011	0.815995	0.815995	0.670307	0.844061	0.003285	0.009819	0.824778	0.840469	0.533111	0.508603	0.047362	0.636472	0.636472	0.52195	0.585379	0.585379
OG0001383	980	1	3	2	3	2	3	2	2	2	2	2	2	1	2	2	2	2	2	3	2	2	19	2	6	7	4	2	4	2	1	2	0.0009	0.347221	0.154062	0.599453	0.191135	0.559421	0.031623	0.739903	0.760273	0.516986	0.50433	0.559421	0.636472	0.20519	0.52195	0.585379	0.585379
OG0000121	50	8	7	10	10	10	12	11	19	12	12	12	17	18	18	21	20	20	18	17	12	12	23	13	16	14	13	9	12	9	2	8	0.0001	0.352445	0.151553	0.145369	0.458289	0.351899	0.165034	0.724994	0.005881	0.589932	0.525152	0.735383	0.662363	0.881554	0.653713	0.361707	0.84427
OG0000362	222	6	7	7	12	7	7	7	6	7	7	7	5	11	8	8	10	8	8	4	7	7	18	6	10	4	8	9	8	7	6	7	0.0027	0.624692	0.868419	0.741913	0.012469	0.66686	0.66686	0.874381	0.664173	0.55579	0.51491	0.66686	0.012858	0.028322	0.579599	0.735868	0.065262
OG0000442	286	0	2	3	8	6	2	5	8	6	6	6	7	5	7	15	15	13	7	5	6	6	21	4	9	7	8	9	8	6	6	6	0.0001	0.006189	0.440855	0.002034	0.178823	0.078376	0.000198	0.609631	0.171901	0.548424	0.512822	0.649148	0.792239	0.058999	0.570772	0.063995	0.063995
OG0000792	545	1	4	2	7	5	2	3	2	2	2	2	1	1	1	1	1	1	1	1	2	2	20	6	10	9	8	9	8	2	2	2	0.0001	0.347221	0.053162	0.599453	0.00057	0.005608	0.128423	0.164412	0.760273	0.516986	0.50433	0.559421	0.576855	0.576855	0.511161	0.545784	0.545784
OG0000666	458	8	3	6	9	4	9	6	12	6	6	6	6	7	7	10	8	8	7	2	5	5	3	2	2	2	2	2	2	3	1	3	0	0.132156	0.036372	0.721613	0.106315	0.00768	0.001238	0.862635	0.003022	0.548424	0.512822	0.078376	0.469541	0.792239	0.570772	0.065262	0.735868
OG0000688	474	5	3	5	4	4	7	6	8	6	6	6	7	6	7	8	8	8	7	13	6	6	2	0	2	1	2	2	2	5	3	5	0.0084	0.839273	0.192783	0.345833	0.290969	0.00768	0.093557	0.862635	0.171901	0.548424	0.512822	0.649148	0.792239	0.469541	0.570772	0.735868	0.735868
OG0000872	596	5	4	5	4	4	8	6	8	5	5	5	5	4	5	5	5	5	5	10	5	5	2	1	2	4	2	2	2	3	1	3	0.0076	0.839273	0.55685	0.697969	0.608768	0.00768	0.020741	0.355305	0.073135	0.540866	0.510719	0.629747	0.749318	0.391267	0.552217	0.675585	0.675585
OG0000893	612	4	4	4	4	4	9	5	6	4	4	4	4	3	4	4	3	4	4	11	4	4	2	2	2	2	2	2	2	3	1	3	0.0014	0.815995	0.815995	0.670307	0.844061	0.197925	3.3e-05	0.302254	0.102955	0.533111	0.508603	0.60847	0.719948	0.340635	0.542465	0.649559	0.228313
OG0000907	623	6	5	5	5	3	9	5	9	5	5	5	2	3	3	3	3	3	3	9	5	5	0	2	2	1	2	2	2	4	2	4	0.0007	0.337518	0.839273	0.697969	0.863415	0.005286	3.3e-05	0.846908	0.017585	0.540866	0.510719	0.629747	0.279572	0.683116	0.53238	0.61971	0.61971
OG0000910	625	5	4	5	4	3	7	5	8	5	5	5	4	3	4	6	4	4	4	8	5	5	2	2	2	2	2	2	2	5	4	5	0.0463	0.839273	0.55685	0.697969	0.608768	0.005286	0.01491	0.846908	0.073135	0.540866	0.510719	0.629747	0.719948	0.340635	0.542465	0.020376	0.649559
OG0001342	950	8	1	3	3	2	1	2	2	3	3	3	5	5	5	8	7	7	5	4	4	4	2	1	2	2	2	2	2	4	4	4	0.05	0.000554	0.048657	0.637804	0.814454	0.559421	0.089163	0.458252	0.491041	0.525153	0.506474	0.16458	0.749318	0.749318	0.552217	0.157328	0.718304
OG0001421	1006	2	2	3	2	2	6	3	4	3	3	3	4	4	4	4	4	4	4	7	3	3	0	4	2	3	2	2	2	3	3	3	0.0306	0.440855	0.440855	0.637804	0.498896	0.128423	0.000176	0.791855	0.267687	0.525153	0.506474	0.585106	0.719948	0.719948	0.542465	0.649559	0.649559
OG0001676	1193	0	3	1	3	1	1	1	1	1	1	1	0	29	1	0	0	0	1	1	1	1	0	0	0	8	2	2	2	1	1	1	0.0001	0.209991	0.011913	0.554022	0.018248	0.531151	0.531151	0.653052	0.671201	0.508604	0.502172	0.531151	0.11368	0	0.511161	0.5	0.5
OG0002202	1569	1	1	1	8	1	1	1	8	2	2	2	2	1	2	5	2	2	2	2	2	2	1	5	2	1	2	2	2	2	1	2	0.0001	0.644064	0.644064	0.149344	0.000128	0.531151	0.531151	0.363929	0.000109	0.516986	0.50433	0.559421	0.636472	0.20519	0.52195	0.000191	0.585379
OG0003112	2189	1	1	1	1	1	4	2	3	2	2	2	1	3	2	1	3	2	2	3	2	2	1	2	2	3	2	2	2	2	2	2	0.0218	0.644064	0.644064	0.149344	0.404097	0.089163	0.00244	0.739903	0.185667	0.516986	0.50433	0.559421	0.20519	0.079663	0.52195	0.128168	0.046794
OG0003133	2206	2	1	1	1	1	1	1	2	1	1	1	1	1	1	3	1	1	1	5	1	1	0	7	2	3	2	2	2	1	1	1	0.0176	0.076229	0.644064	0.554022	0.6758	0.531151	0.531151	0.653052	0.091158	0.508604	0.502172	0.531151	0.576855	0.576855	0.511161	0.001097	0.545784
OG0000201	105	14	13	12	12	10	10	10	12	11	11	11	8	4	7	6	5	6	7	37	11	11	16	8	10	8	9	10	9	8	1	7	0.0003	0.277689	0.542074	0.268025	0.577947	0.711456	0.711456	0.712597	0.570717	0.583445	0.52313	0.723924	0.253098	0.009089	0.570772	0.698343	0.307554
OG0000282	163	7	6	7	7	5	7	6	7	7	7	7	13	14	12	13	10	12	12	6	7	7	20	6	10	7	9	10	9	7	5	7	0.0035	0.868419	0.624692	0.741913	0.887207	0.228721	0.093557	0.638702	0.884835	0.55579	0.51491	0.66686	0.373163	0.12585	0.612143	0.250074	0.056453
OG0000200	104	13	8	11	7	9	19	13	13	11	11	11	10	12	11	10	11	11	11	23	11	11	1	5	4	8	5	3	5	9	7	9	0.0001	0.257007	0.170484	0.799389	0.067604	0.000327	6e-06	0.275197	0.310696	0.583445	0.52313	0.723924	0.569679	0.352802	0.604401	0.444851	0.777305
OG0000223	121	7	10	10	12	10	18	13	7	10	10	10	12	8	12	19	18	17	12	12	10	10	3	4	4	7	5	3	5	7	4	7	0.0001	0.151553	0.892395	0.78782	0.295976	0.00379	7.9e-05	0.105694	0.197723	0.576793	0.521095	0.711456	0.849897	0.006776	0.612143	0.094363	0.324516
OG0000239	131	8	9	10	7	8	15	11	17	11	11	11	11	9	10	11	10	10	10	21	11	11	3	2	3	10	5	3	5	9	8	9	0.0001	0.352445	0.686459	0.485554	0.067604	0.00237	0.000529	0.902157	0.012989	0.583445	0.52313	0.723924	0.33077	0.54954	0.596403	0.215292	0.765103
OG0000278	159	9	9	10	8	7	16	11	14	10	10	10	11	9	9	8	9	9	9	18	10	10	3	6	5	5	5	3	5	8	5	8	0.0001	0.686459	0.686459	0.78782	0.415285	0.000169	3.9e-05	0.51937	0.082759	0.576793	0.521095	0.711456	0.085395	0.82128	0.588139	0.398151	0.751372
OG0000409	262	2	7	6	4	6	8	7	10	7	7	7	8	9	9	9	9	9	9	12	7	7	9	4	6	4	5	3	5	7	6	7	0.0268	0.007681	0.38143	0.380748	0.133279	0.257201	0.108472	0.874381	0.075977	0.55579	0.51491	0.66686	0.526577	0.82128	0.588139	0.751372	0.751372
OG0000430	277	11	5	8	7	6	11	8	10	8	8	8	7	8	7	5	6	6	7	12	8	8	5	5	5	7	5	3	5	6	2	6	0.0006	0.111543	0.065054	0.759424	0.691827	0.013512	0.002721	0.883526	0.234222	0.56297	0.516985	0.683051	0.792239	0.253098	0.570772	0.307554	0.698343
OG0000456	297	6	5	6	5	5	9	7	9	6	6	6	6	7	7	8	6	7	7	6	6	6	7	2	5	10	5	3	5	6	5	6	0.0376	0.855941	0.594718	0.721613	0.643204	0.010433	0.027188	0.399654	0.100455	0.548424	0.512822	0.649148	0.469541	0.792239	0.570772	0.157328	0.341012
OG0000619	420	5	4	5	4	5	4	5	5	5	5	5	5	5	5	5	5	5	5	12	5	5	1	3	3	18	5	3	5	5	3	5	0.0115	0.839273	0.55685	0.697969	0.608768	0.629747	0.197925	0.846908	0.860362	0.540866	0.510719	0.629747	0.749318	0.749318	0.552217	0.675585	0.675585
OG0000756	519	3	2	3	4	2	3	3	3	4	4	4	7	5	6	10	7	7	6	9	4	4	8	3	5	11	5	3	5	4	3	4	0.004	0.781861	0.440855	0.260933	0.844061	0.128423	0.585106	0.524334	0.555548	0.533111	0.508603	0.60847	0.222877	0.433673	0.561649	0.00546	0.718304
OG0000760	522	4	5	5	3	5	8	6	9	5	5	5	2	5	3	2	2	2	3	7	5	5	3	7	5	7	5	3	5	4	2	4	0.0018	0.55685	0.839273	0.697969	0.248093	0.228721	0.020741	0.355305	0.017585	0.540866	0.510719	0.629747	0.279572	0.032188	0.53238	0.585379	0.585379
OG0001081	753	2	2	3	2	5	3	4	3	3	3	3	2	2	2	2	2	2	2	3	3	3	2	2	3	25	5	3	5	4	5	4	0.0117	0.440855	0.440855	0.637804	0.498896	0.062964	0.16458	0.238877	0.810177	0.525153	0.506474	0.585106	0.636472	0.636472	0.52195	0.585379	0.585379
OG0001106	771	1	2	2	2	2	4	2	5	2	2	2	2	2	2	2	2	2	2	2	2	2	15	13	10	2	5	3	5	2	2	2	0.029	0.347221	0.729234	0.599453	0.765192	0.559421	0.00244	0.739903	0.009646	0.516986	0.50433	0.559421	0.636472	0.636472	0.52195	0.585379	0.585379
OG0000144	62	1	7	6	5	8	11	9	18	6	6	6	5	5	5	4	3	4	5	2	5	5	49	33	34	24	25	25	23	5	2	5	0.001	0.000567	0.38143	0.721613	0.643204	0.308042	0.041513	0.078598	1e-06	0.548424	0.512822	0.078376	0.749318	0.749318	0.552217	0.649559	0.228313
OG0000139	59	11	8	10	6	5	11	9	10	10	10	10	10	8	9	9	8	9	9	24	10	10	34	6	17	28	17	13	16	10	8	10	0.0002	0.502248	0.352445	0.78782	0.055827	7.4e-05	0.041513	0.698371	0.905135	0.576793	0.521095	0.711456	0.306911	0.526577	0.588139	0.751372	0.398151
OG0000496	326	6	5	5	4	5	4	5	9	5	5	5	4	2	3	2	2	2	3	3	4	4	17	16	14	11	11	11	10	4	1	4	0.0036	0.337518	0.839273	0.697969	0.608768	0.629747	0.197925	0.846908	0.017585	0.540866	0.510719	0.062964	0.118466	0.279572	0.53238	0.585379	0.585379
OG0000058	16	15	25	21	27	24	26	25	25	21	21	21	17	15	18	25	20	21	18	15	19	19	34	12	19	13	17	14	17	18	15	18	0.0002	0.026813	0.127124	0.864112	0.071343	0.539529	0.320545	0.141783	0.171858	0.641566	0.542773	0.124445	0.662363	0.122788	0.653713	0.014198	0.587443
OG0000071	25	17	14	18	16	14	24	19	25	19	19	19	16	17	17	17	19	18	17	32	19	19	21	16	18	17	17	14	17	17	14	17	0.0001	0.767045	0.145453	0.602502	0.358766	0.000138	0.000382	0.926581	0.053862	0.631064	0.538945	0.794349	0.652627	0.877646	0.647325	0.555637	0.337477
OG0000159	72	6	7	7	8	8	9	8	11	8	8	8	6	5	6	6	6	6	6	14	8	8	45	19	25	21	19	14	17	8	3	7	0.0004	0.624692	0.868419	0.411633	0.895169	0.683051	0.123096	0.883526	0.093912	0.56297	0.516985	0.683051	0.772977	0.433673	0.561649	0.698343	0.698343
OG0000160	73	15	6	12	9	6	15	11	15	12	12	12	13	13	13	13	13	13	13	27	12	12	1	2	3	14	6	4	6	11	9	11	0.0001	0.123224	0.002506	0.809565	0.247405	1e-05	0.000529	0.724994	0.16562	0.589932	0.525152	0.735383	0.856918	0.856918	0.619639	0.797918	0.797918
OG0000177	87	14	12	13	15	11	15	13	22	13	13	13	11	12	11	11	11	11	11	8	11	11	6	4	5	9	6	4	6	9	6	9	0.0084	0.558796	0.725422	0.81856	0.360646	0.032766	0.073654	0.910484	0.001288	0.596257	0.527161	0.057179	0.841801	0.352802	0.604401	0.777305	0.777305
OG0000205	109	11	9	11	8	7	14	11	17	11	11	11	10	10	10	9	11	10	10	21	11	11	7	6	6	8	6	4	6	8	4	8	0.0001	0.897842	0.37562	0.799389	0.227133	0.000169	0.006258	0.902157	0.012989	0.583445	0.52313	0.723924	0.832372	0.832372	0.596403	0.422639	0.215292
OG0000473	307	5	5	6	6	5	8	6	10	6	6	6	6	6	6	6	6	6	6	12	6	6	12	5	7	7	6	4	6	5	2	5	0.0064	0.594718	0.594718	0.721613	0.877033	0.228721	0.020741	0.862635	0.027761	0.548424	0.512822	0.649148	0.772977	0.772977	0.561649	0.698343	0.698343
OG0000627	428	3	4	4	5	4	6	5	5	4	4	4	5	4	4	4	4	4	4	5	4	4	21	6	9	4	6	4	6	4	3	4	0.0215	0.5075	0.815995	0.670307	0.343296	0.197925	0.078376	0.302254	0.335112	0.533111	0.508603	0.60847	0.155479	0.719948	0.542465	0.649559	0.649559
OG0000895	614	4	2	3	2	1	2	2	2	3	3	3	4	4	4	3	3	3	4	13	4	4	5	10	7	8	6	4	6	4	2	4	0.0026	0.224621	0.440855	0.637804	0.498896	0.089163	0.559421	0.458252	0.491041	0.525153	0.506474	0.16458	0.719948	0.719948	0.542465	0.61971	0.61971
OG0000284	164	12	8	10	9	5	15	10	13	10	10	10	7	7	7	5	8	7	7	12	10	10	3	4	5	13	7	5	7	10	11	10	0	0.234875	0.352445	0.78782	0.724959	6e-06	2.6e-05	0.896996	0.130346	0.576793	0.521095	0.711456	0.792239	0.792239	0.570772	0.022236	0.157328
OG0000435	282	8	5	5	6	4	5	5	6	5	5	5	5	5	5	7	6	6	5	6	5	5	24	5	10	8	7	5	7	4	1	4	0.0003	0.048206	0.839273	0.697969	0.398322	0.197925	0.629747	0.846908	0.389852	0.540866	0.510719	0.629747	0.749318	0.749318	0.552217	0.136482	0.698343
OG0000944	653	1	1	1	1	1	2	1	1	1	1	1	1	1	1	1	1	1	1	2	1	1	27	14	15	4	8	5	7	4	7	4	0.0258	0.644064	0.644064	0.554022	0.6758	0.531151	0.01581	0.653052	0.671201	0.508604	0.502172	0.531151	0.576855	0.576855	0.511161	0.545784	0.545784
OG0000267	151	10	8	10	8	6	16	11	17	11	11	11	10	10	10	11	7	10	10	26	11	11	1	1	1	3	3	3	3	7	4	7	0.0001	0.892395	0.352445	0.485554	0.227133	1e-05	3.9e-05	0.902157	0.012989	0.583445	0.52313	0.723924	0.832372	0.832372	0.596403	0.215292	0.005437
OG0000307	181	16	16	13	8	9	13	11	18	11	11	11	22	5	10	7	13	10	10	3	9	9	3	2	3	1	3	3	3	7	5	7	0.0001	0.137626	0.137626	0.065084	0.227133	0.024399	0.057179	0.902157	0.007413	0.583445	0.52313	0.041513	0	0.000548	0.596403	0.005437	0.013254
OG0000331	199	14	10	11	11	10	7	9	20	10	10	10	10	8	10	19	13	13	10	2	8	8	6	0	3	2	3	3	3	5	1	5	0.0001	0.108651	0.701215	0.248592	0.55852	0.137407	0.016885	0.698371	0.000157	0.576793	0.521095	0.034144	0.832372	0.183677	0.596403	4.8e-05	0.797918
OG0000464	302	7	6	7	7	5	11	8	11	7	7	7	7	7	7	7	7	7	7	13	7	7	2	1	2	3	3	3	3	5	2	5	0.001	0.868419	0.624692	0.741913	0.887207	0.00092	0.002721	0.436955	0.03991	0.55579	0.51491	0.66686	0.792239	0.792239	0.570772	0.718304	0.718304
OG0000524	348	5	3	5	8	5	8	6	8	6	6	6	10	4	6	6	7	6	6	8	6	6	3	3	3	3	3	3	3	5	3	5	0.0105	0.839273	0.192783	0.345833	0.178823	0.228721	0.020741	0.862635	0.171901	0.548424	0.512822	0.649148	0.001824	0.045685	0.561649	0.698343	0.136482
OG0000542	362	9	4	7	7	5	4	5	8	7	7	7	5	8	6	6	6	6	6	4	7	7	1	2	2	4	3	3	3	9	21	11	0.0112	0.159678	0.050244	0.741913	0.887207	0.629747	0.197925	0.284769	0.471368	0.55579	0.51491	0.66686	0.433673	0.097728	0.561649	0.698343	0.698343
OG0000564	377	4	5	5	5	5	11	7	9	5	5	5	5	6	5	5	4	5	5	9	5	5	7	2	3	2	3	3	3	4	3	4	0.0013	0.55685	0.839273	0.697969	0.863415	0.010433	0.000107	0.114986	0.017585	0.540866	0.510719	0.629747	0.749318	0.190333	0.552217	0.675585	0.270185
OG0000718	492	9	5	5	4	6	5	5	8	5	5	5	8	6	7	8	7	7	7	2	5	5	5	1	3	4	3	3	3	4	2	4	0.0243	0.009783	0.839273	0.697969	0.608768	0.078376	0.629747	0.846908	0.073135	0.540866	0.510719	0.629747	0.253098	0.469541	0.570772	0.157328	0.718304
OG0000767	526	5	3	5	4	4	9	6	8	5	5	5	3	4	3	3	3	3	3	11	5	5	2	2	2	5	3	3	3	4	3	4	0.003	0.839273	0.192783	0.697969	0.608768	0.00768	0.001238	0.355305	0.073135	0.540866	0.510719	0.629747	0.683116	0.118466	0.53238	0.61971	0.61971
OG0000785	539	6	4	6	4	2	7	5	6	6	6	6	2	3	3	2	2	2	3	16	6	6	2	1	2	5	3	3	3	6	8	6	0.0001	0.855941	0.231646	0.721613	0.290969	0.000198	0.01491	0.609631	0.874374	0.548424	0.512822	0.649148	0.279572	0.683116	0.53238	0.585379	0.585379
OG0000803	553	3	3	4	3	3	4	4	4	4	4	4	4	5	5	5	5	5	5	16	5	5	2	4	3	5	3	3	3	4	2	4	0.0124	0.5075	0.5075	0.670307	0.562934	0.16458	0.60847	0.824778	0.840469	0.533111	0.508603	0.197925	0.391267	0.749318	0.552217	0.675585	0.675585
OG0000961	665	2	7	4	3	2	4	3	3	4	4	4	5	8	6	11	4	6	6	12	4	4	0	2	2	5	3	3	3	3	1	3	0	0.15032	0.029965	0.670307	0.562934	0.128423	0.047362	0.524334	0.555548	0.533111	0.508603	0.60847	0.433673	0.097728	0.561649	2.1e-05	0.016633
OG0000965	668	6	3	4	4	3	6	4	11	4	4	4	2	3	2	2	1	2	2	6	4	4	2	4	3	4	3	3	3	3	2	3	0.0027	0.076569	0.5075	0.670307	0.844061	0.16458	0.009819	0.824778	0.000177	0.533111	0.508603	0.60847	0.636472	0.079663	0.52195	0.585379	0.128168
OG0000992	692	1	1	2	8	5	8	6	5	5	5	5	7	4	5	4	4	4	5	5	5	5	1	3	2	2	3	3	3	6	10	6	0.0148	0.347221	0.347221	0.001151	0.077854	0.228721	0.020741	0.355305	0.860362	0.540866	0.510719	0.629747	0.074833	0.391267	0.552217	0.649559	0.649559
OG0001168	821	6	2	4	2	2	4	3	4	4	4	4	4	4	4	4	3	4	4	7	4	4	2	4	3	3	3	3	3	3	1	3	0.0484	0.076569	0.15032	0.670307	0.199136	0.128423	0.047362	0.524334	0.840469	0.533111	0.508603	0.60847	0.719948	0.719948	0.542465	0.649559	0.228313
OG0001204	845	4	2	3	2	2	1	2	4	3	3	3	4	3	4	7	2	4	4	7	4	4	2	1	2	5	3	3	3	4	6	4	0.0153	0.224621	0.440855	0.637804	0.498896	0.559421	0.089163	0.458252	0.267687	0.525153	0.506474	0.16458	0.719948	0.340635	0.542465	0.001211	0.007369
OG0001254	882	3	3	3	3	4	7	5	5	3	3	3	1	4	2	2	2	2	2	6	3	3	3	2	3	4	3	3	3	3	2	3	0.0469	0.781861	0.781861	0.637804	0.814454	0.197925	0.01491	0.114739	0.069258	0.525153	0.506474	0.585106	0.20519	0.014969	0.52195	0.585379	0.585379
OG0000273	156	8	7	9	9	7	10	9	14	9	9	9	7	8	8	8	8	8	8	17	9	9	8	8	8	9	8	6	8	8	4	8	0.0147	0.669307	0.326817	0.774602	0.901622	0.016885	0.137407	0.890895	0.022483	0.56997	0.519047	0.697872	0.500173	0.808091	0.579599	0.735868	0.735868
OG0000488	318	2	5	4	4	5	5	5	7	4	4	4	3	3	3	3	5	3	3	4	4	4	39	2	11	8	8	6	8	4	3	4	0.0003	0.15032	0.285654	0.670307	0.844061	0.629747	0.629747	0.302254	0.047193	0.533111	0.508603	0.60847	0.683116	0.683116	0.53238	0.61971	0.011894
OG0000541	361	1	6	4	7	3	5	4	12	4	4	4	3	3	3	3	2	3	3	5	4	4	31	3	10	8	8	6	8	4	1	4	0.0001	0.0137	0.076569	0.670307	0.050557	0.16458	0.062964	0.824778	4.5e-05	0.533111	0.508603	0.60847	0.683116	0.683116	0.53238	0.61971	0.181245
OG0000082	32	18	15	16	12	9	11	11	20	16	16	16	15	22	18	22	18	19	18	20	16	16	21	16	18	15	17	18	17	15	10	14	0.0018	0.347704	0.752773	0.84008	0.174793	0.024399	0.723924	0.040366	0.11876	0.614309	0.53311	0.772927	0.122788	0.038753	0.653713	0.052431	0.566995
OG0000297	173	8	9	8	8	7	8	8	11	8	8	8	8	6	7	7	7	7	7	10	8	8	32	6	12	8	9	7	9	7	2	6	0.0001	0.878131	0.45067	0.759424	0.895169	0.283578	0.683051	0.883526	0.093912	0.56297	0.516985	0.683051	0.253098	0.469541	0.570772	0.718304	0.718304
OG0000077	28	34	15	21	20	15	24	20	30	20	20	20	12	18	16	14	19	16	16	27	19	19	4	11	8	16	10	8	10	13	3	11	0.0002	6.6e-05	0.026813	0.402883	0.935131	0.000174	0.003828	0.928502	0.00302	0.636379	0.540865	0.261701	0.015654	0.177782	0.640731	0.165117	0.037457
OG0000295	171	9	5	8	14	7	7	7	7	8	8	8	0	9	7	7	8	7	7	13	8	8	10	7	9	22	10	8	10	8	8	8	0.0001	0.45067	0.065054	0.759424	0.005521	0.66686	0.66686	0.662268	0.686241	0.56297	0.516985	0.683051	0	0.120649	0.570772	0.718304	0.157328
OG0000079	30	18	17	19	27	17	21	19	35	20	20	20	18	16	19	21	24	21	19	28	19	19	2	2	3	4	4	4	4	11	3	10	0.0003	0.773314	0.502847	0.612373	0.030734	0.061285	0.124445	0.7876	3.6e-05	0.636379	0.540865	0.261701	0.671329	0.132272	0.659904	0.848791	0.063032
OG0000324	194	6	6	8	6	7	11	9	13	9	9	9	11	11	11	10	11	11	11	20	9	9	2	3	3	4	4	4	4	7	4	7	0.0005	0.298384	0.298384	0.43908	0.18267	0.016885	0.041513	0.890895	0.067874	0.56997	0.519047	0.697872	0.841801	0.841801	0.604401	0.444851	0.777305
OG0000454	296	6	6	6	5	5	10	7	9	6	6	6	5	5	5	5	5	5	5	17	6	6	6	3	4	3	4	4	4	5	2	5	0.0002	0.855941	0.855941	0.721613	0.643204	0.010433	0.001894	0.399654	0.100455	0.548424	0.512822	0.649148	0.749318	0.749318	0.552217	0.675585	0.675585
OG0000460	300	3	5	6	5	6	9	7	11	7	7	7	9	9	8	7	7	7	8	12	7	7	2	5	4	6	4	4	4	5	2	5	0.0017	0.036372	0.594718	0.380748	0.328372	0.257201	0.027188	0.874381	0.03991	0.55579	0.51491	0.66686	0.281069	0.281069	0.579599	0.718304	0.718304
OG0000478	310	4	4	6	5	5	8	7	10	7	7	7	5	7	7	7	7	7	7	22	7	7	4	5	4	4	4	4	4	5	3	5	0.0001	0.231646	0.231646	0.380748	0.328372	0.010433	0.108472	0.874381	0.075977	0.55579	0.51491	0.66686	0.058999	0.792239	0.570772	0.718304	0.718304
OG0000486	316	4	6	6	15	7	7	7	8	7	7	7	9	6	7	7	6	7	7	6	7	7	0	4	3	7	4	4	4	5	3	5	0.0072	0.231646	0.855941	0.380748	0.000629	0.66686	0.66686	0.874381	0.471368	0.55579	0.51491	0.66686	0.120649	0.469541	0.570772	0.718304	0.341012
OG0000570	380	6	5	6	5	5	8	6	9	6	6	6	6	7	6	6	6	6	6	10	6	6	0	5	3	4	4	4	4	5	3	5	0.0362	0.855941	0.594718	0.721613	0.643204	0.228721	0.020741	0.862635	0.100455	0.548424	0.512822	0.649148	0.772977	0.222877	0.561649	0.698343	0.698343
OG0000573	382	7	9	7	12	7	4	6	12	7	7	7	4	3	3	3	3	3	3	1	4	4	6	4	4	3	4	4	4	4	2	4	0.0003	0.868419	0.159678	0.741913	0.012469	0.093557	0.00768	0.638702	0.011256	0.55579	0.51491	0.000395	0.118466	0.683116	0.53238	0.61971	0.61971
OG0000635	434	4	5	5	6	5	7	6	12	5	5	5	3	3	3	3	3	3	3	12	5	5	4	4	4	5	4	4	4	4	2	4	0.0117	0.55685	0.839273	0.697969	0.398322	0.228721	0.093557	0.355305	0.000594	0.540866	0.510719	0.629747	0.683116	0.683116	0.53238	0.61971	0.61971
OG0000642	439	3	5	4	3	5	5	5	8	4	4	4	5	7	7	12	10	10	7	3	4	4	6	2	4	5	4	4	4	3	1	3	0.0014	0.5075	0.285654	0.670307	0.562934	0.629747	0.629747	0.302254	0.009901	0.533111	0.508603	0.60847	0.058999	0.792239	0.570772	0.090659	0.765103
OG0000749	513	3	4	4	5	4	5	4	5	4	4	4	4	5	4	4	5	4	4	4	4	4	21	4	7	1	4	4	4	4	2	4	0.0019	0.5075	0.815995	0.670307	0.343296	0.60847	0.062964	0.824778	0.335112	0.533111	0.508603	0.60847	0.719948	0.155479	0.542465	0.649559	0.092721
OG0000896	615	4	3	4	4	2	8	4	8	4	4	4	3	3	3	3	3	3	3	2	4	4	11	3	5	3	4	4	4	5	7	5	0.0011	0.815995	0.5075	0.670307	0.844061	0.003285	1.6e-05	0.824778	0.009901	0.533111	0.508603	0.60847	0.683116	0.683116	0.53238	0.61971	0.61971
OG0001096	764	2	4	3	3	3	4	3	4	3	3	3	2	2	3	3	3	3	3	5	3	3	14	1	5	4	4	4	4	3	2	3	0.0184	0.440855	0.224621	0.637804	0.814454	0.585106	0.047362	0.791855	0.267687	0.525153	0.506474	0.585106	0.279572	0.279572	0.53238	0.61971	0.61971
OG0001221	858	0	4	3	3	4	4	4	4	3	3	3	3	2	3	4	6	4	3	3	3	3	8	4	5	5	4	4	4	3	1	3	0.0202	0.006189	0.224621	0.637804	0.814454	0.60847	0.60847	0.238877	0.267687	0.525153	0.506474	0.585106	0.683116	0.279572	0.53238	0.649559	0.020376
OG0001537	1091	1	1	1	1	1	1	1	1	1	1	1	8	4	5	4	6	5	5	6	3	3	2	5	4	6	4	4	4	3	2	3	0.0284	0.644064	0.644064	0.554022	0.6758	0.531151	0.531151	0.653052	0.671201	0.508604	0.502172	0.001716	0.009412	0.391267	0.552217	0.270185	0.114925
OG0001556	1106	1	2	2	7	2	2	2	8	3	3	3	3	1	3	3	3	3	3	3	3	3	6	2	4	6	4	4	4	3	1	3	0.0091	0.347221	0.729234	0.209068	0.005431	0.559421	0.559421	0.458252	0.001262	0.525153	0.506474	0.585106	0.683116	0.012219	0.53238	0.61971	0.61971
OG0002909	2063	1	4	2	1	2	3	2	3	2	2	2	0	1	1	1	1	1	1	1	2	2	1	3	3	9	4	4	4	2	1	2	0.0499	0.347221	0.053162	0.599453	0.404097	0.559421	0.031623	0.739903	0.185667	0.516986	0.50433	0.559421	0.11368	0.576855	0.511161	0.545784	0.545784
OG0000356	217	3	6	4	3	7	5	5	5	4	4	4	3	3	4	7	6	6	4	6	4	4	45	5	16	13	12	9	11	4	1	4	0.0004	0.5075	0.076569	0.670307	0.562934	0.01491	0.629747	0.302254	0.335112	0.533111	0.508603	0.60847	0.340635	0.340635	0.542465	0.136482	0.698343
OG0000313	185	4	4	5	3	5	6	5	6	5	5	5	6	4	5	4	7	5	5	5	5	5	50	8	18	10	13	10	12	7	8	7	0.001	0.55685	0.55685	0.697969	0.248093	0.629747	0.078376	0.846908	0.389852	0.540866	0.510719	0.629747	0.190333	0.391267	0.552217	0.270185	0.030285
OG0000327	196	4	4	5	3	3	5	4	7	5	5	5	4	4	4	5	4	4	4	8	5	5	26	38	24	4	13	10	12	6	7	6	0.0003	0.55685	0.55685	0.697969	0.248093	0.16458	0.062964	0.572743	0.137814	0.540866	0.510719	0.629747	0.719948	0.719948	0.542465	0.092721	0.649559
OG0000279	160	10	10	11	14	8	14	11	14	11	11	11	9	9	9	8	8	8	9	14	10	10	4	4	4	4	5	5	5	8	5	8	0.013	0.701215	0.701215	0.799389	0.155166	0.00237	0.006258	0.902157	0.148222	0.583445	0.52313	0.151389	0.82128	0.82128	0.588139	0.735868	0.735868
OG0000319	190	13	7	9	7	7	11	9	11	9	9	9	11	9	10	11	10	10	10	12	9	9	6	3	5	6	5	5	5	7	3	7	0.0069	0.042827	0.326817	0.774602	0.389837	0.016885	0.041513	0.890895	0.261919	0.56997	0.519047	0.697872	0.33077	0.54954	0.596403	0.215292	0.765103
OG0000368	228	8	5	7	4	4	7	6	8	7	7	7	11	9	9	10	8	9	9	17	8	8	3	3	4	9	5	5	5	7	5	7	0.0026	0.418741	0.266775	0.741913	0.133279	0.00768	0.093557	0.638702	0.471368	0.55579	0.51491	0.283578	0.085395	0.82128	0.588139	0.196747	0.398151
OG0000372	232	4	5	6	8	5	12	8	10	8	8	8	11	7	9	7	11	9	9	15	8	8	5	2	4	6	5	5	5	6	3	6	0	0.231646	0.594718	0.038654	0.895169	0.00092	0.000172	0.883526	0.234222	0.56297	0.516985	0.683051	0.085395	0.163444	0.588139	0.03491	0.077868
OG0000624	425	4	4	4	4	3	5	4	6	4	4	4	6	4	5	6	5	5	5	4	4	4	18	2	6	5	5	5	5	4	3	4	0.003	0.815995	0.815995	0.670307	0.844061	0.16458	0.062964	0.824778	0.102955	0.533111	0.508603	0.60847	0.190333	0.391267	0.552217	0.114925	0.675585
OG0000722	495	5	4	4	4	4	6	5	6	4	4	4	4	3	4	9	4	5	4	5	4	4	8	4	5	4	5	5	5	4	3	4	0.0179	0.285654	0.815995	0.670307	0.844061	0.197925	0.078376	0.302254	0.102955	0.533111	0.508603	0.60847	0.719948	0.340635	0.542465	0.000147	0.270185
OG0000987	687	5	5	4	3	3	6	4	2	4	4	4	6	4	4	3	3	3	4	3	4	4	10	2	5	5	5	5	5	5	6	5	0.0383	0.285654	0.285654	0.670307	0.562934	0.16458	0.009819	0.824778	0.192007	0.533111	0.508603	0.60847	0.052645	0.719948	0.542465	0.61971	0.61971
OG0001153	811	5	1	3	1	4	3	3	6	3	3	3	4	2	3	3	4	3	3	4	3	3	5	4	5	8	5	5	5	3	2	3	0.0345	0.102994	0.048657	0.637804	0.144205	0.047362	0.585106	0.791855	0.024996	0.525153	0.506474	0.585106	0.118466	0.279572	0.53238	0.61971	0.069966
OG0001416	1001	1	5	2	1	2	3	2	5	2	2	2	1	1	1	1	1	1	1	1	2	2	13	7	8	5	5	5	5	2	1	2	0.0163	0.347221	0.005817	0.599453	0.404097	0.559421	0.031623	0.739903	0.009646	0.516986	0.50433	0.559421	0.576855	0.576855	0.511161	0.545784	0.545784
OG0000165	78	7	9	9	9	5	8	7	11	9	9	9	4	4	5	8	7	7	6	7	9	9	47	14	21	4	14	12	14	15	34	18	0.0005	0.326817	0.885942	0.774602	0.901622	0.010433	0.108472	0.345506	0.261919	0.56997	0.519047	0.697872	0.391267	0.391267	0.093181	0.157328	0.718304
OG0000176	86	11	8	11	8	9	14	11	12	11	11	11	14	15	14	11	17	14	14	25	12	12	6	7	7	6	7	7	7	10	6	10	0.0001	0.897842	0.170484	0.799389	0.227133	0.024399	0.006258	0.902157	0.570717	0.583445	0.52313	0.371586	0.863063	0.409465	0.626896	0.013016	0.028362
OG0000209	111	5	13	10	13	8	8	8	32	11	11	11	11	12	12	12	15	13	12	10	11	11	6	9	7	7	7	7	7	9	4	8	0.0001	0.008858	0.094043	0.485554	0.319428	0.683051	0.683051	0.186609	0	0.583445	0.52313	0.723924	0.58748	0.849897	0.612143	0.483512	0.063995
OG0000616	418	5	3	4	2	5	4	4	5	4	4	4	3	4	3	3	3	3	3	4	4	4	23	11	12	3	7	7	7	5	5	5	0.0454	0.285654	0.5075	0.670307	0.199136	0.062964	0.60847	0.824778	0.335112	0.533111	0.508603	0.60847	0.683116	0.118466	0.53238	0.61971	0.61971
OG0001333	942	2	1	2	1	1	2	2	1	2	2	2	5	1	3	3	3	3	3	4	3	3	13	6	8	7	7	7	7	3	2	3	0.0142	0.729234	0.347221	0.599453	0.404097	0.089163	0.559421	0.739903	0.396211	0.516986	0.50433	0.128423	0.032188	0.012219	0.53238	0.61971	0.61971
OG0000143	61	11	15	14	16	14	19	16	24	14	14	14	11	12	13	14	14	14	13	14	13	13	5	8	7	10	8	8	8	10	4	9	0.0003	0.222758	0.573843	0.82655	0.378818	0.046522	0.015556	0.33393	0.000577	0.602425	0.529157	0.191281	0.239264	0.603333	0.619639	0.806658	0.806658
OG0000225	123	2	13	10	26	20	14	16	14	11	11	11	8	5	7	6	10	7	7	4	8	8	15	4	8	7	8	8	8	7	5	7	0.0001	8e-06	0.094043	0.485554	1e-06	0.00188	0.046522	0.025921	0.148222	0.583445	0.52313	0.002721	0.253098	0.058999	0.570772	0.341012	0.00546
OG0000397	252	5	11	8	10	6	10	8	11	8	8	8	3	3	3	3	3	3	3	13	7	7	8	7	8	13	8	8	8	6	2	6	0	0.065054	0.111543	0.759424	0.242324	0.013512	0.034144	0.883526	0.093912	0.56297	0.516985	0.108472	0.683116	0.683116	0.53238	0.61971	0.61971
OG0000686	472	4	2	3	3	2	2	2	6	3	3	3	2	3	3	3	3	3	3	5	3	3	23	5	10	8	8	8	8	3	1	3	0.001	0.224621	0.440855	0.637804	0.814454	0.559421	0.559421	0.458252	0.024996	0.525153	0.506474	0.585106	0.279572	0.683116	0.53238	0.61971	0.61971
OG0000738	508	1	3	3	2	3	3	3	4	3	3	3	4	5	5	5	5	5	5	5	4	4	4	16	9	12	8	8	8	4	2	4	0.0283	0.048657	0.781861	0.637804	0.498896	0.585106	0.585106	0.791855	0.267687	0.525153	0.506474	0.16458	0.391267	0.749318	0.552217	0.675585	0.675585
OG0000462	301	10	2	7	2	8	8	8	6	7	7	7	14	13	13	12	17	13	13	12	7	7	1	1	1	1	1	1	1	5	3	5	0	0.08997	0.001162	0.741913	0.003261	0.683051	0.683051	0.436955	0.664173	0.55579	0.51491	0.66686	0.392004	0.856918	0.619639	0.483512	0.003511
OG0000555	370	20	2	5	3	4	11	6	4	5	5	5	13	11	11	13	9	11	11	3	5	5	0	1	1	0	1	1	1	4	3	4	0.0001	0	0.023978	0.697969	0.248093	0.00768	3e-06	0.355305	0.601916	0.540866	0.510719	0.629747	0.112379	0.841801	0.604401	0.103513	0.049021
OG0000599	403	5	5	6	3	4	9	6	10	6	6	6	7	7	7	8	7	7	7	17	6	6	0	0	0	0	0	1	1	3	1	3	0	0.594718	0.594718	0.721613	0.061447	0.00768	0.001238	0.862635	0.027761	0.548424	0.512822	0.649148	0.792239	0.792239	0.570772	0.157328	0.718304
OG0000651	446	12	17	11	13	9	12	10	8	9	9	9	0	2	2	3	5	3	3	2	4	4	0	1	1	1	1	1	1	3	1	3	0	0.523358	0.006318	0.100314	0.072644	0.330764	0.049215	0.495801	0.704508	0.56997	0.519047	2e-06	0.004844	0.636472	0.048665	0.61971	0.011894
OG0000905	621	5	4	5	7	1	4	4	24	5	5	5	4	2	3	3	3	3	3	6	5	5	0	0	0	0	0	1	1	5	5	5	0.0001	0.839273	0.55685	0.697969	0.143784	8.9e-05	0.60847	0.572743	0	0.540866	0.510719	0.629747	0.118466	0.279572	0.53238	0.61971	0.61971
OG0000942	651	5	4	5	6	5	11	7	8	5	5	5	4	5	4	4	4	4	4	8	5	5	0	0	0	1	1	1	1	3	1	3	0.0032	0.839273	0.55685	0.697969	0.398322	0.010433	0.000107	0.114986	0.073135	0.540866	0.510719	0.629747	0.719948	0.155479	0.542465	0.649559	0.649559
OG0000948	654	8	3	5	2	2	2	2	6	5	5	5	8	8	8	10	9	9	8	11	5	5	0	0	0	0	0	1	1	4	3	4	0.0258	0.048206	0.192783	0.697969	0.042405	0.559421	0.559421	0.028586	0.389852	0.540866	0.510719	0.629747	0.808091	0.808091	0.579599	0.196747	0.751372
OG0001264	892	7	8	6	7	6	8	6	5	5	5	5	1	3	2	1	2	2	2	4	4	4	1	0	1	2	1	1	1	3	1	3	0.0125	0.38143	0.132156	0.135259	0.143784	0.649148	0.020741	0.355305	0.860362	0.540866	0.510719	0.062964	0.20519	0.079663	0.52195	0.128168	0.585379
OG0001584	1124	1	1	1	1	2	1	2	6	2	2	2	1	3	2	1	5	2	2	1	2	2	1	1	1	1	1	1	1	2	3	2	0.0145	0.644064	0.644064	0.149344	0.404097	0.559421	0.089163	0.739903	0.002229	0.516986	0.50433	0.559421	0.20519	0.079663	0.52195	0.128168	0.000191
OG0001594	1130	21	2	4	10	1	2	2	2	3	3	3	2	2	2	2	1	2	2	2	2	2	1	2	1	1	1	1	1	2	2	2	0.0001	0	0.15032	0.082766	8.9e-05	0.089163	0.559421	0.458252	0.491041	0.525153	0.506474	0.031623	0.636472	0.636472	0.52195	0.585379	0.128168
OG0002302	1639	3	2	3	1	2	5	3	5	3	3	3	7	3	4	3	4	4	4	1	3	3	0	1	1	1	1	1	1	3	2	3	0.0112	0.781861	0.440855	0.637804	0.144205	0.128423	0.005608	0.791855	0.069258	0.525153	0.506474	0.585106	0.00533	0.340635	0.542465	0.228313	0.649559
OG0002514	1783	3	3	3	2	3	5	4	6	3	3	3	1	1	1	3	1	1	1	2	2	2	0	1	1	2	1	1	1	2	1	2	0.048	0.781861	0.781861	0.637804	0.498896	0.16458	0.062964	0.238877	0.024996	0.525153	0.506474	0.031623	0.576855	0.576855	0.511161	0.001097	0.545784
OG0002646	1876	6	2	2	1	2	1	2	4	2	2	2	1	1	2	4	6	4	2	1	2	2	0	1	1	2	1	1	1	2	3	2	0.0079	0.001116	0.729234	0.599453	0.404097	0.559421	0.089163	0.739903	0.07543	0.516986	0.50433	0.559421	0.20519	0.20519	0.52195	0.649559	0.020376
OG0003162	2227	1	2	2	2	2	3	2	1	2	2	2	2	7	3	2	4	3	3	3	2	2	0	1	1	1	1	1	1	2	1	2	0.0301	0.347221	0.729234	0.599453	0.765192	0.559421	0.031623	0.739903	0.396211	0.516986	0.50433	0.559421	0.279572	0.000236	0.53238	0.181245	0.069966
OG0003282	2299	1	1	1	0	1	1	1	4	2	2	2	6	7	5	3	1	3	4	3	2	2	0	0	0	0	0	1	1	2	1	2	0.0103	0.644064	0.644064	0.149344	0.035782	0.531151	0.531151	0.363929	0.07543	0.516986	0.50433	0.559421	0.190333	0.074833	0.022432	0.61971	0.003932
OG0003609	2514	2	2	2	3	1	3	2	1	2	2	2	5	1	2	1	2	2	2	2	2	2	1	0	1	1	1	1	1	2	1	2	0.0441	0.729234	0.729234	0.599453	0.191135	0.089163	0.031623	0.739903	0.396211	0.516986	0.50433	0.559421	0.000901	0.20519	0.52195	0.128168	0.585379
OG0004099	2844	1	1	1	1	1	3	1	9	1	1	1	1	1	1	1	1	1	1	2	1	1	1	0	1	1	1	1	1	1	1	1	0.0424	0.644064	0.644064	0.554022	0.6758	0.531151	0.0005	0.653052	1e-06	0.508604	0.502172	0.531151	0.576855	0.576855	0.511161	0.545784	0.545784
OG0004194	2914	1	0	1	0	0	0	0	7	1	1	1	4	6	4	4	1	4	4	0	1	1	0	0	0	0	0	1	1	1	1	1	0.0001	0.644064	0.209991	0.554022	0.254217	0.5	0.5	0.222606	2.2e-05	0.508604	0.502172	0.531151	0.719948	0.052645	0.542465	0.649559	0.000317
OG0004371	3042	1	1	1	1	10	2	3	2	1	1	1	1	1	1	1	1	1	1	2	1	1	0	0	0	2	1	1	1	1	1	1	0.0009	0.644064	0.644064	0.554022	0.6758	0	0.128423	0.013555	0.091158	0.508604	0.502172	0.531151	0.576855	0.576855	0.511161	0.545784	0.545784
OG0004848	3377	1	1	1	1	7	1	2	1	1	1	1	1	2	1	1	1	1	1	1	1	1	0	2	1	1	1	1	1	1	1	1	0.0062	0.644064	0.644064	0.554022	0.6758	0	0.089163	0.081169	0.671201	0.508604	0.502172	0.531151	0.576855	0.039773	0.511161	0.545784	0.545784
OG0006280	4382	1	1	1	1	6	1	2	1	1	1	1	2	1	1	1	1	1	1	1	1	1	0	1	1	1	1	1	1	1	1	1	0.0404	0.644064	0.644064	0.554022	0.6758	2e-06	0.089163	0.081169	0.671201	0.508604	0.502172	0.531151	0.039773	0.576855	0.511161	0.545784	0.545784
OG0000980	680	2	2	2	1	1	2	2	2	2	2	2	1	1	1	2	0	1	1	4	2	2	12	5	9	14	9	9	9	6	12	7	0.0069	0.729234	0.729234	0.599453	0.404097	0.089163	0.559421	0.739903	0.760273	0.516986	0.50433	0.559421	0.576855	0.576855	0.511161	0.02339	0.068126
OG0000265	149	8	7	8	9	8	9	8	8	8	8	8	12	6	9	8	10	9	9	10	8	8	17	5	10	12	10	10	10	8	7	8	0.0354	0.878131	0.649056	0.759424	0.510244	0.683051	0.123096	0.883526	0.893011	0.56297	0.516985	0.683051	0.036361	0.017219	0.588139	0.398151	0.196747
OG0000328	197	5	5	5	5	4	5	5	5	5	5	5	14	5	9	10	10	10	9	5	5	5	28	10	15	13	12	11	11	5	1	5	0.0001	0.839273	0.839273	0.697969	0.863415	0.197925	0.629747	0.846908	0.860362	0.540866	0.510719	0.629747	0.000974	0.002647	0.588139	0.765103	0.765103
OG0000359	219	5	4	5	4	3	5	4	6	5	5	5	4	3	4	4	5	4	4	11	5	5	24	8	13	15	12	11	11	5	5	5	0.0017	0.839273	0.55685	0.697969	0.608768	0.16458	0.062964	0.572743	0.389852	0.540866	0.510719	0.629747	0.719948	0.340635	0.542465	0.649559	0.092721
OG0000133	54	8	15	12	12	17	28	20	18	12	12	12	9	7	9	9	8	9	9	6	10	10	34	5	14	8	12	12	12	10	8	10	0.0002	0.047398	0.123224	0.809565	0.915514	0.011665	0	0.001605	0.01676	0.589932	0.525152	0.049215	0.82128	0.163444	0.588139	0.751372	0.398151
OG0000320	191	5	5	6	4	8	6	7	10	7	7	7	3	6	6	7	10	7	6	9	7	7	6	7	8	33	12	12	12	9	11	9	0.0002	0.594718	0.594718	0.380748	0.133279	0.108472	0.257201	0.874381	0.075977	0.55579	0.51491	0.66686	0.005964	0.772977	0.561649	0.718304	0.00546
OG0000413	264	5	1	3	2	4	3	3	4	3	3	3	3	3	3	3	3	3	3	4	3	3	35	14	18	12	13	12	12	3	3	3	0.0007	0.102994	0.048657	0.637804	0.498896	0.047362	0.585106	0.791855	0.267687	0.525153	0.506474	0.585106	0.683116	0.683116	0.53238	0.61971	0.61971
OG0000161	74	5	4	6	6	4	4	4	14	7	7	7	24	15	19	22	25	22	19	6	7	7	26	15	17	14	14	13	13	6	1	5	0.0001	0.594718	0.231646	0.380748	0.670117	0.60847	0.60847	0.058419	0.001214	0.55579	0.51491	0.66686	0.012172	0.024514	0.659904	0.852959	0.068458
OG0000350	214	5	3	6	8	14	17	15	26	9	7	7	6	4	5	6	5	5	5	5	6	6	2	1	2	2	2	1	2	4	1	4	0.0001	0.594718	0.036372	0.380748	0.479622	0.423158	0.09054	0.004279	0	0.002435	0.51491	0.093557	0.190333	0.391267	0.552217	0.114925	0.675585
OG0000371	231	5	11	9	9	8	15	11	11	9	9	9	8	7	8	9	7	8	8	14	9	9	1	1	1	4	2	1	2	7	5	7	0.0005	0.024042	0.211248	0.774602	0.901622	0.00237	0.000529	0.228195	0.261919	0.56997	0.519047	0.697872	0.808091	0.500173	0.579599	0.177424	0.371066
OG0000375	234	5	11	9	20	21	20	20	11	10	10	10	1	4	3	1	2	2	3	1	6	6	2	1	2	1	2	1	2	6	8	6	0.0001	0.024042	0.211248	0.463582	0.000193	0.272268	0.800503	6.4e-05	0.55104	0.576793	0.521095	6.2e-05	0.012219	0.118466	0.53238	0.128168	0.585379
OG0000423	272	6	10	9	16	9	12	10	23	10	10	10	3	2	4	5	4	4	4	11	8	8	3	2	2	1	2	1	2	7	6	7	0.0001	0.131993	0.478233	0.463582	0.010893	0.330764	0.049215	0.896996	6e-06	0.576793	0.521095	0.034144	0.340635	0.021864	0.542465	0.092721	0.649559
OG0000516	343	6	7	7	6	6	12	8	12	7	7	7	5	5	5	4	5	5	5	13	7	7	1	1	1	3	2	1	2	5	3	5	0.0007	0.624692	0.868419	0.741913	0.670117	0.013512	0.000172	0.436955	0.011256	0.55579	0.51491	0.66686	0.749318	0.749318	0.552217	0.270185	0.675585
OG0000562	375	10	5	6	5	5	7	6	4	6	6	6	7	14	9	7	12	9	9	3	6	6	1	0	1	2	2	1	2	5	5	5	0.0003	0.015935	0.594718	0.721613	0.643204	0.228721	0.093557	0.862635	0.282589	0.548424	0.512822	0.649148	0.163444	0.000974	0.588139	0.03491	0.010279
OG0000582	390	7	6	6	6	5	8	6	13	6	6	6	6	10	7	7	6	7	7	5	6	6	3	2	2	3	2	1	2	4	1	4	0.0014	0.38143	0.855941	0.721613	0.877033	0.228721	0.020741	0.862635	0.000666	0.548424	0.512822	0.649148	0.469541	0.021046	0.570772	0.718304	0.341012
OG0000611	414	3	3	4	3	3	5	4	8	5	5	5	11	7	8	11	7	8	8	13	6	6	3	2	2	2	2	1	2	6	6	6	0.0015	0.5075	0.5075	0.306179	0.248093	0.16458	0.062964	0.572743	0.073135	0.540866	0.510719	0.228721	0.028322	0.500173	0.579599	0.007675	0.371066
OG0000684	471	7	3	4	4	3	5	4	4	4	4	4	9	11	10	13	13	12	10	1	4	4	1	1	1	6	2	1	2	3	2	3	0.0003	0.029965	0.5075	0.670307	0.844061	0.16458	0.062964	0.824778	0.840469	0.533111	0.508603	0.60847	0.54954	0.33077	0.596403	0.250074	0.250074
OG0000702	482	3	9	6	9	6	7	6	9	6	6	6	5	7	6	8	6	6	6	4	6	6	1	3	2	4	2	1	2	4	2	4	0.0163	0.036372	0.06859	0.721613	0.106315	0.649148	0.093557	0.862635	0.100455	0.548424	0.512822	0.649148	0.433673	0.222877	0.561649	0.041255	0.698343
OG0000765	524	4	2	4	3	3	7	5	8	5	5	5	5	7	6	7	7	7	6	5	5	5	1	1	1	6	2	1	2	5	8	5	0.0244	0.815995	0.15032	0.306179	0.248093	0.005286	0.01491	0.846908	0.073135	0.540866	0.510719	0.629747	0.433673	0.222877	0.561649	0.718304	0.718304
OG0000771	529	5	4	5	4	4	8	6	5	5	5	5	7	6	7	7	7	7	7	11	5	5	1	3	2	2	2	1	2	4	3	4	0.0439	0.839273	0.55685	0.697969	0.608768	0.00768	0.020741	0.355305	0.860362	0.540866	0.510719	0.629747	0.792239	0.469541	0.570772	0.718304	0.718304
OG0000787	541	4	4	5	4	5	4	5	16	6	6	6	4	6	5	5	4	5	5	8	6	6	1	1	1	5	2	1	2	6	6	6	0.0243	0.55685	0.55685	0.345833	0.290969	0.629747	0.197925	0.609631	1.4e-05	0.548424	0.512822	0.649148	0.391267	0.190333	0.552217	0.675585	0.270185
OG0000852	581	11	1	3	3	2	1	2	5	3	3	3	11	16	11	13	6	10	10	0	3	3	3	1	2	2	2	1	2	3	2	3	0	4e-06	0.048657	0.637804	0.814454	0.559421	0.089163	0.458252	0.069258	0.525153	0.506474	0.585106	0.841801	0.002006	0.055739	0.013254	0.00053
OG0000853	582	4	5	4	3	5	3	4	4	4	4	4	4	5	4	1	6	4	4	4	4	4	1	0	1	3	2	1	2	7	27	10	0.0001	0.815995	0.285654	0.670307	0.562934	0.062964	0.16458	0.824778	0.840469	0.533111	0.508603	0.60847	0.719948	0.155479	0.542465	0.000317	0.020376
OG0000858	585	5	6	6	6	8	8	8	10	6	6	6	4	2	4	4	6	4	4	8	6	6	1	3	2	3	2	1	2	4	2	4	0.0391	0.594718	0.855941	0.721613	0.877033	0.683051	0.683051	0.145089	0.027761	0.548424	0.512822	0.649148	0.719948	0.021864	0.542465	0.649559	0.020376
OG0000874	598	6	4	5	4	4	8	6	7	5	5	5	5	4	5	6	5	5	5	8	5	5	1	4	2	2	2	1	2	4	2	4	0.0255	0.337518	0.55685	0.697969	0.608768	0.00768	0.020741	0.355305	0.137814	0.540866	0.510719	0.629747	0.749318	0.391267	0.552217	0.114925	0.675585
OG0000951	657	9	3	5	2	3	6	5	6	5	5	5	6	6	6	6	5	6	6	7	5	5	1	1	1	3	2	1	2	3	1	3	0.0058	0.009783	0.192783	0.697969	0.042405	0.005286	0.078376	0.846908	0.389852	0.540866	0.510719	0.629747	0.772977	0.772977	0.561649	0.698343	0.307554
OG0000991	691	4	3	4	3	3	6	4	6	4	4	4	8	2	4	5	3	4	4	8	4	4	1	2	2	5	2	1	2	4	4	4	0.0014	0.815995	0.5075	0.670307	0.562934	0.16458	0.009819	0.824778	0.102955	0.533111	0.508603	0.60847	0.000525	0.021864	0.542465	0.092721	0.228313
OG0001000	698	5	3	5	6	4	9	6	7	5	5	5	5	4	4	3	4	4	4	6	5	5	1	1	1	3	2	1	2	3	1	3	0.0068	0.839273	0.192783	0.697969	0.398322	0.00768	0.001238	0.355305	0.137814	0.540866	0.510719	0.629747	0.155479	0.719948	0.542465	0.228313	0.649559
OG0001015	706	4	1	4	3	3	15	6	2	4	4	4	3	3	4	4	4	4	4	6	4	4	1	1	1	4	2	1	2	5	8	5	0	0.815995	0.0137	0.670307	0.562934	0.000368	0	0.084991	0.192007	0.533111	0.508603	0.60847	0.340635	0.340635	0.542465	0.649559	0.649559
OG0001056	734	2	4	4	3	4	7	5	9	4	4	4	4	3	3	3	3	3	3	6	4	4	1	4	2	4	2	1	2	3	1	3	0.0076	0.15032	0.815995	0.670307	0.562934	0.197925	0.01491	0.302254	0.003752	0.533111	0.508603	0.60847	0.118466	0.683116	0.53238	0.61971	0.61971
OG0001206	847	5	4	4	3	4	7	5	4	4	4	4	5	3	3	3	3	3	3	8	4	4	0	1	1	3	2	1	2	3	1	3	0.0326	0.285654	0.815995	0.670307	0.562934	0.197925	0.01491	0.302254	0.840469	0.533111	0.508603	0.60847	0.032188	0.683116	0.53238	0.61971	0.61971
OG0001495	1058	2	4	3	2	2	4	3	1	3	3	3	4	5	4	4	4	4	4	9	3	3	5	1	2	1	2	1	2	2	1	2	0.0096	0.440855	0.224621	0.637804	0.498896	0.128423	0.047362	0.791855	0.138381	0.525153	0.506474	0.585106	0.719948	0.155479	0.542465	0.649559	0.649559
OG0001532	1086	1	2	2	1	3	4	3	7	3	3	3	4	5	5	6	9	6	5	1	3	3	3	1	2	3	2	1	2	3	3	3	0.005	0.347221	0.729234	0.209068	0.144205	0.585106	0.047362	0.791855	0.004928	0.525153	0.506474	0.585106	0.391267	0.749318	0.552217	0.698343	0.003646
OG0001565	1113	2	2	3	2	2	4	3	3	3	3	3	3	4	4	6	2	4	4	6	4	4	0	1	1	3	2	1	2	5	8	5	0.0389	0.440855	0.440855	0.637804	0.498896	0.128423	0.047362	0.791855	0.810177	0.525153	0.506474	0.16458	0.340635	0.719948	0.542465	0.020376	0.007369
OG0001597	1132	3	2	2	2	2	2	2	2	2	2	2	3	3	3	10	6	6	3	2	2	2	2	5	3	3	2	1	2	2	1	2	0.0197	0.154062	0.729234	0.599453	0.765192	0.559421	0.559421	0.739903	0.760273	0.516986	0.50433	0.559421	0.683116	0.683116	0.53238	0.00027	0.698343
OG0001605	1139	5	4	4	4	2	3	3	4	3	3	3	1	1	1	1	1	1	1	1	2	2	18	2	4	1	2	1	2	2	2	2	0.0013	0.285654	0.815995	0.082766	0.274992	0.128423	0.585106	0.791855	0.267687	0.525153	0.506474	0.031623	0.576855	0.576855	0.511161	0.545784	0.545784
OG0001618	1151	2	2	3	2	2	8	4	4	3	3	3	3	1	2	1	2	2	2	9	3	3	2	1	2	4	2	1	2	3	4	3	0.0001	0.440855	0.440855	0.637804	0.498896	0.003285	1.6e-05	0.238877	0.267687	0.525153	0.506474	0.585106	0.079663	0.20519	0.52195	0.128168	0.585379
OG0001681	1195	5	2	3	2	2	3	3	2	3	3	3	3	3	3	4	5	4	3	4	3	3	8	0	2	3	2	1	2	2	1	2	0.0169	0.102994	0.440855	0.637804	0.498896	0.128423	0.585106	0.791855	0.491041	0.525153	0.506474	0.585106	0.683116	0.683116	0.53238	0.649559	0.092721
OG0001682	1196	4	2	3	1	5	4	4	7	3	3	3	2	4	2	2	0	2	2	0	3	3	0	1	1	6	2	1	2	3	5	3	0.001	0.224621	0.440855	0.637804	0.144205	0.062964	0.60847	0.238877	0.004928	0.525153	0.506474	0.585106	0.636472	0.014969	0.52195	0.585379	0.001461
OG0001825	1292	5	2	3	2	3	2	3	5	3	3	3	0	4	3	4	5	4	3	5	3	3	0	3	2	2	2	1	2	3	2	3	0.0055	0.102994	0.440855	0.637804	0.498896	0.585106	0.128423	0.791855	0.069258	0.525153	0.506474	0.585106	0.000681	0.118466	0.53238	0.649559	0.092721
OG0001838	1302	2	1	2	2	1	6	3	4	3	3	3	3	4	3	3	3	3	3	5	3	3	0	2	2	4	2	1	2	4	6	4	0.0131	0.729234	0.347221	0.209068	0.498896	0.001716	0.000176	0.791855	0.267687	0.525153	0.506474	0.585106	0.683116	0.118466	0.53238	0.61971	0.61971
OG0001867	1324	3	2	3	2	2	3	3	4	3	3	3	2	9	3	2	2	2	3	4	3	3	1	6	2	1	2	1	2	3	2	3	0.0037	0.781861	0.440855	0.637804	0.498896	0.128423	0.585106	0.791855	0.267687	0.525153	0.506474	0.585106	0.279572	3e-06	0.53238	0.585379	0.585379
OG0001960	1391	2	2	2	2	2	3	2	4	2	2	2	1	1	1	2	1	1	1	11	2	2	0	2	2	5	2	1	2	2	2	2	0.0079	0.729234	0.729234	0.599453	0.765192	0.559421	0.031623	0.739903	0.07543	0.516986	0.50433	0.559421	0.576855	0.576855	0.511161	0.02339	0.545784
OG0001982	1405	5	1	3	3	2	2	2	4	3	3	3	2	5	4	4	5	4	4	1	3	3	0	1	1	7	2	1	2	3	2	3	0.028	0.102994	0.048657	0.637804	0.814454	0.559421	0.559421	0.458252	0.267687	0.525153	0.506474	0.585106	0.021864	0.155479	0.542465	0.649559	0.092721
OG0002041	1451	2	3	3	7	1	3	3	5	3	3	3	2	3	3	2	3	3	3	3	3	3	0	3	2	2	2	1	2	2	1	2	0.0262	0.440855	0.781861	0.637804	0.005431	0.001716	0.585106	0.791855	0.069258	0.525153	0.506474	0.585106	0.279572	0.683116	0.53238	0.181245	0.61971
OG0002386	1700	1	3	2	7	4	2	2	2	2	2	2	2	3	3	4	4	4	3	1	2	2	1	2	2	4	2	1	2	2	1	2	0.0237	0.347221	0.154062	0.599453	0.00057	0.00244	0.559421	0.739903	0.760273	0.516986	0.50433	0.559421	0.279572	0.683116	0.53238	0.649559	0.649559
OG0002484	1758	1	1	1	1	2	3	2	2	2	2	2	3	1	2	3	1	2	2	1	2	2	0	1	1	16	2	1	2	2	2	2	0.0021	0.644064	0.644064	0.149344	0.404097	0.559421	0.031623	0.739903	0.760273	0.516986	0.50433	0.559421	0.079663	0.20519	0.52195	0.046794	0.128168
OG0002577	1825	2	1	2	1	1	4	2	3	2	2	2	1	1	2	2	3	2	2	6	2	2	1	2	2	4	2	1	2	2	3	2	0.0224	0.729234	0.347221	0.599453	0.404097	0.089163	0.00244	0.739903	0.185667	0.516986	0.50433	0.559421	0.20519	0.20519	0.52195	0.585379	0.046794
OG0002628	1870	0	2	2	1	2	4	2	2	2	2	2	1	1	2	5	4	4	2	1	2	2	3	5	3	1	2	1	2	3	4	3	0.0219	0.021962	0.729234	0.599453	0.404097	0.559421	0.00244	0.739903	0.760273	0.516986	0.50433	0.559421	0.20519	0.20519	0.52195	0.092721	0.649559
OG0003491	2426	3	1	2	1	3	1	2	7	2	2	2	0	0	0	1	1	1	1	2	2	2	2	1	2	4	2	1	2	2	1	2	0.0131	0.154062	0.347221	0.599453	0.404097	0.031623	0.089163	0.739903	0.000498	0.516986	0.50433	0.559421	0.5	0.5	0.01671	0.545784	0.545784
OG0003718	2583	1	1	1	1	1	3	2	8	2	2	2	0	1	1	1	1	1	1	3	2	2	0	2	2	4	2	1	2	2	1	2	0.006	0.644064	0.644064	0.149344	0.404097	0.089163	0.031623	0.739903	0.000109	0.516986	0.50433	0.559421	0.11368	0.576855	0.511161	0.545784	0.545784
OG0007847	5520	0	0	0	1	0	0	0	0	1	1	1	0	0	0	0	1	1	1	0	1	1	0	7	2	4	2	1	2	2	5	2	0.0348	0.5	0.5	0.080261	0.6758	0.5	0.5	0.222606	0.247864	0.508604	0.502172	0.531151	0.5	0.5	0.01671	0.068126	0.545784
OG0000081	31	14	19	16	14	18	26	21	20	16	16	16	13	13	13	13	11	13	13	22	15	15	23	11	16	18	15	15	15	12	4	11	0.0001	0.464379	0.178983	0.84008	0.522421	0.01314	0.000572	0.061734	0.11876	0.614309	0.53311	0.216128	0.856918	0.856918	0.619639	0.797918	0.128974
OG0000347	212	9	7	9	7	7	11	9	11	9	9	9	9	10	10	10	10	10	10	16	9	9	2	3	3	5	3	2	3	6	2	6	0.0031	0.885942	0.326817	0.774602	0.389837	0.016885	0.041513	0.890895	0.261919	0.56997	0.519047	0.697872	0.54954	0.832372	0.596403	0.765103	0.765103
OG0000358	218	14	8	10	5	7	13	10	14	10	10	10	7	9	9	11	8	9	9	16	10	10	1	2	2	4	3	2	3	7	5	7	0	0.053687	0.352445	0.78782	0.019315	0.001798	0.004902	0.896996	0.082759	0.576793	0.521095	0.711456	0.163444	0.82128	0.588139	0.077868	0.398151
OG0000360	220	9	8	9	7	7	11	9	11	9	9	9	13	8	10	11	9	10	10	13	9	9	2	2	2	4	3	2	3	6	3	6	0.0045	0.885942	0.669307	0.774602	0.389837	0.016885	0.041513	0.890895	0.261919	0.56997	0.519047	0.697872	0.045013	0.183677	0.596403	0.215292	0.422639
OG0000380	238	9	6	7	7	6	15	9	8	7	7	7	7	7	7	7	8	7	7	8	7	7	1	2	2	7	3	2	3	6	4	6	0.0005	0.159678	0.624692	0.741913	0.887207	0.001316	1e-06	0.174307	0.471368	0.55579	0.51491	0.66686	0.792239	0.792239	0.570772	0.718304	0.157328
OG0000381	239	7	7	8	6	6	10	8	11	8	8	8	11	10	10	10	10	10	10	16	8	8	2	1	2	5	3	2	3	6	3	6	0.0038	0.649056	0.649056	0.759424	0.36108	0.013512	0.034144	0.883526	0.093912	0.56297	0.516985	0.683051	0.33077	0.832372	0.596403	0.765103	0.765103
OG0000394	249	8	6	8	6	8	11	9	9	8	8	8	6	5	6	5	7	6	6	19	8	8	2	3	3	4	3	2	3	7	7	7	0.0113	0.878131	0.298384	0.759424	0.36108	0.308042	0.041513	0.468625	0.502237	0.56297	0.516985	0.683051	0.772977	0.433673	0.561649	0.307554	0.136482
OG0000400	255	12	8	10	12	8	10	9	21	10	10	10	9	7	7	8	5	7	7	7	8	8	4	2	3	3	3	2	3	5	1	5	0.0001	0.234875	0.352445	0.78782	0.295976	0.308042	0.137407	0.698371	7.4e-05	0.576793	0.521095	0.034144	0.120649	0.792239	0.570772	0.157328	0.022236
OG0000406	259	10	8	8	8	8	13	10	12	8	8	8	8	6	7	7	7	7	7	7	7	7	1	4	3	4	3	2	3	5	3	5	0.013	0.186141	0.878131	0.759424	0.895169	0.020523	0.004902	0.202092	0.053452	0.56297	0.516985	0.108472	0.253098	0.469541	0.570772	0.718304	0.718304
OG0000431	278	8	4	7	6	7	21	11	9	7	7	7	6	7	7	9	10	9	7	8	7	7	2	5	3	4	3	2	3	6	5	6	0.0001	0.418741	0.050244	0.741913	0.670117	0.000169	0	0.028507	0.204184	0.55579	0.51491	0.66686	0.469541	0.792239	0.570772	0.751372	0.196747
OG0000498	328	6	6	7	6	6	10	8	12	7	7	7	5	5	6	6	6	6	6	13	7	7	3	2	3	3	3	2	3	5	2	5	0.0047	0.624692	0.624692	0.741913	0.670117	0.013512	0.034144	0.436955	0.011256	0.55579	0.51491	0.66686	0.433673	0.433673	0.561649	0.698343	0.698343
OG0000556	371	6	4	6	4	4	8	6	6	6	6	6	6	5	6	6	5	6	6	20	6	6	2	4	3	6	3	2	3	4	2	4	0.0001	0.855941	0.231646	0.721613	0.290969	0.00768	0.020741	0.862635	0.874374	0.548424	0.512822	0.649148	0.772977	0.433673	0.561649	0.698343	0.307554
OG0000563	376	7	4	6	3	5	8	6	11	6	6	6	4	4	5	6	5	5	5	22	6	6	2	2	2	3	3	2	3	6	6	6	0.0001	0.38143	0.231646	0.721613	0.061447	0.228721	0.020741	0.862635	0.007273	0.548424	0.512822	0.649148	0.391267	0.391267	0.552217	0.114925	0.675585
OG0000612	415	8	5	7	7	10	10	10	10	7	7	7	2	4	4	6	5	5	4	8	6	6	3	2	3	4	3	2	3	4	2	4	0.0347	0.418741	0.266775	0.741913	0.887207	0.711456	0.711456	0.101996	0.075977	0.55579	0.51491	0.093557	0.021864	0.719948	0.542465	0.114925	0.675585
OG0000681	468	7	5	6	4	4	7	6	9	6	6	6	6	6	6	6	6	6	6	9	6	6	0	3	2	4	3	2	3	4	1	4	0.0101	0.38143	0.594718	0.721613	0.290969	0.00768	0.093557	0.862635	0.100455	0.548424	0.512822	0.649148	0.772977	0.772977	0.561649	0.698343	0.698343
OG0000700	480	5	3	5	3	3	5	4	5	5	5	5	8	5	6	6	8	6	6	13	5	5	2	1	2	5	3	2	3	5	4	5	0.0134	0.839273	0.192783	0.697969	0.248093	0.16458	0.062964	0.572743	0.860362	0.540866	0.510719	0.629747	0.097728	0.433673	0.561649	0.698343	0.041255
OG0000724	497	1	5	5	5	4	7	6	11	6	6	6	5	4	5	5	5	5	5	6	6	6	4	6	4	2	3	2	3	6	8	6	0.0476	0.001964	0.839273	0.345833	0.643204	0.00768	0.093557	0.862635	0.007273	0.548424	0.512822	0.649148	0.749318	0.391267	0.552217	0.675585	0.675585
OG0000727	499	5	4	5	3	4	7	5	11	5	5	5	4	4	4	5	4	4	4	12	5	5	1	1	1	7	3	2	3	5	4	5	0.0045	0.839273	0.55685	0.697969	0.248093	0.197925	0.01491	0.846908	0.00148	0.540866	0.510719	0.629747	0.719948	0.719948	0.542465	0.092721	0.649559
OG0000894	613	6	3	5	3	3	6	5	6	5	5	5	4	4	5	5	5	5	5	10	5	5	2	3	3	7	3	2	3	4	2	4	0.0203	0.337518	0.192783	0.697969	0.248093	0.005286	0.078376	0.846908	0.389852	0.540866	0.510719	0.629747	0.391267	0.391267	0.552217	0.675585	0.675585
OG0000949	655	5	4	5	6	5	8	6	7	5	5	5	2	3	3	3	3	3	3	4	4	4	5	1	3	3	3	2	3	3	1	3	0.047	0.839273	0.55685	0.697969	0.398322	0.228721	0.020741	0.355305	0.137814	0.540866	0.510719	0.062964	0.279572	0.683116	0.53238	0.61971	0.61971
OG0000990	690	2	3	3	3	3	4	3	5	3	3	3	1	1	1	1	1	1	1	2	2	2	29	4	7	1	3	2	3	2	2	2	0.0001	0.440855	0.781861	0.637804	0.814454	0.585106	0.047362	0.791855	0.069258	0.525153	0.506474	0.031623	0.576855	0.576855	0.511161	0.545784	0.545784
OG0001008	703	5	3	5	5	2	5	4	5	5	5	5	6	5	5	5	4	5	5	9	5	5	0	3	2	4	3	2	3	4	3	4	0.0389	0.839273	0.192783	0.697969	0.863415	0.003285	0.062964	0.572743	0.860362	0.540866	0.510719	0.629747	0.190333	0.749318	0.552217	0.675585	0.270185
OG0001051	731	5	4	4	1	5	4	4	3	4	4	4	9	5	7	8	8	8	7	2	4	4	3	1	2	4	3	2	3	4	3	4	0.0465	0.285654	0.815995	0.670307	0.025543	0.062964	0.60847	0.824778	0.555548	0.533111	0.508603	0.60847	0.120649	0.058999	0.570772	0.735868	0.735868
OG0001237	873	2	5	4	8	4	6	5	6	4	4	4	2	2	2	2	2	2	2	4	3	3	0	3	2	5	3	2	3	3	1	3	0.0257	0.15032	0.285654	0.670307	0.010867	0.197925	0.078376	0.302254	0.102955	0.533111	0.508603	0.047362	0.636472	0.636472	0.52195	0.585379	0.585379
OG0001301	921	1	5	4	3	7	5	5	8	4	4	4	3	2	3	3	3	3	3	5	4	4	3	4	3	4	3	2	3	3	1	3	0.0286	0.0137	0.285654	0.670307	0.562934	0.01491	0.629747	0.302254	0.009901	0.533111	0.508603	0.60847	0.683116	0.279572	0.53238	0.61971	0.61971
OG0001331	941	3	3	3	3	3	3	3	4	3	3	3	5	3	3	2	5	3	3	7	3	3	1	1	1	10	3	2	3	3	2	3	0.0431	0.781861	0.781861	0.637804	0.814454	0.585106	0.585106	0.791855	0.267687	0.525153	0.506474	0.585106	0.032188	0.683116	0.53238	0.181245	0.011894
OG0001454	1026	6	2	4	2	2	6	4	3	4	4	4	2	3	3	4	3	3	3	4	4	4	3	2	3	6	3	2	3	4	5	4	0.0453	0.076569	0.15032	0.670307	0.199136	0.003285	0.009819	0.824778	0.555548	0.533111	0.508603	0.60847	0.279572	0.683116	0.53238	0.069966	0.61971
OG0001846	1310	4	1	3	1	1	4	3	4	3	3	3	2	3	2	2	2	2	2	4	3	3	1	4	3	3	3	2	3	4	9	5	0.037	0.224621	0.048657	0.637804	0.144205	0.001716	0.047362	0.791855	0.267687	0.525153	0.506474	0.585106	0.636472	0.079663	0.52195	0.585379	0.585379
OG0001989	1411	2	2	2	2	5	4	4	2	2	2	2	2	1	2	5	2	2	2	1	2	2	7	3	4	3	3	2	3	2	1	2	0.0282	0.729234	0.729234	0.599453	0.765192	0.062964	0.60847	0.060092	0.760273	0.516986	0.50433	0.559421	0.636472	0.20519	0.52195	0.000191	0.585379
OG0000285	165	19	16	14	9	13	20	15	20	12	12	12	6	1	4	4	2	4	4	13	9	9	1	7	4	4	4	3	4	6	1	5	0.0001	0.038875	0.315045	0.074002	0.247405	0.041802	0.000144	0.137039	0.003023	0.589932	0.525152	0.003723	0.052645	0.00177	0.542465	0.649559	0.007369
OG0000385	243	10	7	8	7	7	13	9	14	8	8	8	7	7	7	7	7	7	7	15	8	8	3	1	3	5	4	3	4	5	1	5	0	0.186141	0.649056	0.759424	0.691827	0.016885	0.000262	0.468625	0.008955	0.56297	0.516985	0.683051	0.792239	0.792239	0.570772	0.718304	0.718304
OG0000389	245	11	8	8	7	7	9	8	13	8	8	8	6	6	6	6	6	6	6	15	8	8	2	3	3	9	4	3	4	5	1	5	0.001	0.111543	0.878131	0.759424	0.691827	0.283578	0.123096	0.883526	0.016353	0.56297	0.516985	0.683051	0.772977	0.772977	0.561649	0.698343	0.698343
OG0000432	279	4	6	6	8	6	9	7	14	7	7	7	11	6	7	7	6	7	7	10	7	7	2	5	4	4	4	3	4	7	7	7	0.0129	0.231646	0.855941	0.380748	0.479622	0.257201	0.027188	0.874381	0.001214	0.55579	0.51491	0.66686	0.002949	0.469541	0.570772	0.718304	0.341012
OG0000474	308	2	4	4	15	4	4	4	4	4	4	4	12	12	12	21	16	16	12	0	4	4	3	3	3	8	4	3	4	4	2	4	0.0001	0.15032	0.815995	0.670307	1e-06	0.60847	0.60847	0.824778	0.840469	0.533111	0.508603	0.60847	0.849897	0.849897	0.612143	0.000969	0.821649
OG0000579	387	7	4	6	3	4	8	6	8	6	6	6	6	5	6	7	6	6	6	13	6	6	1	4	3	5	4	3	4	5	4	5	0.0031	0.38143	0.231646	0.721613	0.061447	0.00768	0.020741	0.862635	0.171901	0.548424	0.512822	0.649148	0.772977	0.433673	0.561649	0.136482	0.698343
OG0000654	448	4	5	5	7	2	5	4	11	6	6	6	6	6	6	6	6	6	6	10	6	6	2	7	4	4	4	3	4	4	1	4	0.001	0.55685	0.839273	0.345833	0.442944	0.003285	0.062964	0.248796	0.007273	0.548424	0.512822	0.649148	0.772977	0.772977	0.561649	0.698343	0.698343
OG0000682	469	5	3	5	3	3	6	5	5	5	5	5	4	5	5	5	6	5	5	13	5	5	4	4	4	7	4	3	4	5	4	5	0.0223	0.839273	0.192783	0.697969	0.248093	0.005286	0.078376	0.846908	0.860362	0.540866	0.510719	0.629747	0.391267	0.749318	0.552217	0.675585	0.114925
OG0000733	504	5	4	5	4	4	6	5	7	5	5	5	4	4	4	5	4	4	4	11	5	5	2	6	4	7	4	3	4	4	2	4	0.0346	0.839273	0.55685	0.697969	0.608768	0.197925	0.078376	0.846908	0.137814	0.540866	0.510719	0.629747	0.719948	0.719948	0.542465	0.092721	0.649559
OG0000795	548	5	3	5	3	3	7	5	5	5	5	5	5	5	5	6	6	6	5	7	5	5	9	1	4	5	4	3	4	5	5	5	0.0277	0.839273	0.192783	0.697969	0.248093	0.005286	0.01491	0.846908	0.860362	0.540866	0.510719	0.629747	0.749318	0.749318	0.552217	0.698343	0.698343
OG0001020	711	1	3	3	3	2	4	3	2	3	3	3	7	3	6	7	13	7	6	7	4	4	5	4	4	6	4	3	4	4	2	4	0	0.048657	0.781861	0.637804	0.814454	0.128423	0.047362	0.791855	0.491041	0.525153	0.506474	0.16458	0.222877	0.005964	0.561649	0.718304	7e-06
OG0001089	757	3	4	3	5	3	6	4	4	3	3	3	3	2	2	1	2	2	2	2	3	3	1	10	4	4	4	3	4	3	3	3	0.0101	0.781861	0.224621	0.637804	0.072605	0.16458	0.009819	0.238877	0.267687	0.525153	0.506474	0.585106	0.079663	0.636472	0.52195	0.128168	0.585379
OG0001110	774	2	4	3	1	4	2	3	11	3	3	3	2	5	3	4	3	3	3	1	3	3	10	3	5	6	4	3	4	3	3	3	0.0001	0.440855	0.224621	0.637804	0.144205	0.047362	0.128423	0.791855	1.7e-05	0.525153	0.506474	0.585106	0.279572	0.032188	0.53238	0.069966	0.61971
OG0001250	878	4	2	3	2	2	4	3	7	3	3	3	5	2	3	2	2	2	3	5	3	3	2	7	4	6	4	3	4	3	3	3	0.0137	0.224621	0.440855	0.637804	0.498896	0.128423	0.047362	0.791855	0.004928	0.525153	0.506474	0.585106	0.032188	0.279572	0.53238	0.585379	0.585379
OG0001487	1055	1	2	2	2	2	3	3	6	3	3	3	4	2	3	3	2	3	3	5	3	3	8	0	4	6	4	3	4	3	2	3	0.004	0.347221	0.729234	0.209068	0.498896	0.128423	0.585106	0.791855	0.024996	0.525153	0.506474	0.585106	0.118466	0.279572	0.53238	0.61971	0.181245
OG0000116	48	13	12	14	12	13	22	17	24	15	15	15	12	13	13	14	13	13	13	37	15	15	3	4	4	8	5	4	5	10	4	9	0.0003	0.735518	0.433381	0.554327	0.301042	0.000891	0.000242	0.350847	0.002442	0.608441	0.53114	0.764629	0.603333	0.856918	0.619639	0.266343	0.797918
OG0000192	97	13	12	13	11	11	17	14	20	13	13	13	11	10	10	9	6	9	10	24	13	13	4	2	4	6	5	4	5	9	4	8	0.0001	0.906607	0.725422	0.81856	0.476638	0.00464	0.011355	0.57456	0.00766	0.596257	0.527161	0.745931	0.33077	0.832372	0.596403	0.751372	0.004062
OG0000218	117	11	8	11	8	6	13	10	14	11	11	11	14	12	13	14	14	14	13	20	11	11	3	4	4	8	5	4	5	9	6	9	0.0002	0.897842	0.170484	0.799389	0.227133	0.000115	0.004902	0.712597	0.148222	0.583445	0.52313	0.723924	0.392004	0.603333	0.619639	0.806658	0.806658
OG0000230	127	13	8	11	9	8	15	11	16	11	11	11	9	11	11	13	11	11	11	19	11	11	6	1	4	5	5	4	5	9	7	9	0.0001	0.257007	0.170484	0.799389	0.437957	0.00237	0.000529	0.902157	0.037274	0.583445	0.52313	0.723924	0.203077	0.841801	0.604401	0.103513	0.777305
OG0000247	137	24	7	11	6	6	12	9	11	10	10	10	11	7	10	11	11	11	10	22	10	10	2	5	4	6	5	4	5	7	2	6	0.0001	1e-06	0.039074	0.248592	0.055827	0.001316	0.003723	0.698371	0.55104	0.576793	0.521095	0.711456	0.33077	0.022111	0.596403	0.777305	0.777305
OG0000300	175	10	8	9	7	6	13	9	11	9	9	9	9	9	9	10	10	10	9	17	9	9	3	4	4	6	5	4	5	8	7	8	0.0032	0.478233	0.669307	0.774602	0.389837	0.001316	0.000262	0.890895	0.261919	0.56997	0.519047	0.697872	0.82128	0.82128	0.588139	0.765103	0.765103
OG0000384	242	8	5	7	5	5	10	7	10	7	7	7	10	9	9	10	11	10	9	10	7	7	10	3	5	6	5	4	5	5	2	5	0.0003	0.418741	0.266775	0.741913	0.328372	0.010433	0.001894	0.874381	0.075977	0.55579	0.51491	0.66686	0.306911	0.82128	0.588139	0.765103	0.215292
OG0000497	327	6	5	6	5	5	8	6	7	6	6	6	5	6	6	7	7	7	6	11	6	6	1	6	4	10	5	4	5	5	4	5	0.0341	0.855941	0.594718	0.721613	0.643204	0.228721	0.020741	0.862635	0.434505	0.548424	0.512822	0.649148	0.433673	0.772977	0.561649	0.718304	0.718304
OG0000501	331	4	4	5	8	4	9	6	17	6	6	6	6	5	5	4	6	5	5	5	6	6	2	6	4	8	5	4	5	5	3	5	0	0.55685	0.55685	0.345833	0.178823	0.00768	0.001238	0.862635	4e-06	0.548424	0.512822	0.649148	0.190333	0.749318	0.552217	0.270185	0.114925
OG0000711	488	12	4	5	3	4	5	4	3	4	4	4	2	2	2	2	2	2	2	10	4	4	13	6	7	4	5	4	5	4	2	4	0.0009	0.000213	0.55685	0.109444	0.562934	0.60847	0.062964	0.824778	0.555548	0.533111	0.508603	0.60847	0.636472	0.636472	0.52195	0.585379	0.585379
OG0000779	534	1	3	3	3	3	5	4	9	5	5	5	6	4	6	7	6	6	6	12	5	5	1	5	4	8	5	4	5	5	3	5	0.0003	0.048657	0.781861	0.016314	0.248093	0.16458	0.062964	0.572743	0.017585	0.540866	0.510719	0.629747	0.772977	0.045685	0.561649	0.136482	0.698343
OG0000800	550	12	4	5	2	2	5	4	7	5	5	5	4	6	5	5	7	5	5	5	5	5	5	4	5	10	5	4	5	4	1	4	0	0.000213	0.55685	0.697969	0.042405	0.003285	0.062964	0.572743	0.137814	0.540866	0.510719	0.629747	0.391267	0.190333	0.552217	0.675585	0.030285
OG0001696	1206	1	1	1	1	1	2	2	2	2	2	2	4	1	2	2	4	2	2	2	2	2	13	4	6	4	5	4	5	3	4	3	0.0184	0.644064	0.644064	0.149344	0.404097	0.089163	0.559421	0.739903	0.760273	0.516986	0.50433	0.559421	0.014969	0.20519	0.52195	0.585379	0.005285
OG0000208	110	12	9	11	9	9	14	11	14	11	11	11	9	9	10	12	11	11	10	19	11	11	3	7	5	6	6	5	6	10	8	10	0.0098	0.523358	0.37562	0.799389	0.437957	0.024399	0.006258	0.902157	0.148222	0.583445	0.52313	0.723924	0.54954	0.54954	0.596403	0.233063	0.777305
OG0000398	253	6	6	7	6	6	10	8	12	8	8	8	6	6	7	7	7	7	7	13	8	8	3	6	5	8	6	5	6	7	5	7	0.0329	0.624692	0.624692	0.411633	0.36108	0.013512	0.034144	0.883526	0.053452	0.56297	0.516985	0.683051	0.469541	0.469541	0.570772	0.718304	0.718304
OG0000440	285	3	6	6	6	6	8	7	14	7	7	7	6	5	5	5	5	5	5	14	7	7	4	8	6	8	6	5	6	6	4	6	0.0044	0.036372	0.855941	0.380748	0.670117	0.257201	0.108472	0.874381	0.001214	0.55579	0.51491	0.66686	0.190333	0.749318	0.552217	0.675585	0.675585
OG0000529	353	4	4	5	6	8	9	8	15	6	6	6	5	5	5	5	5	5	5	6	6	6	12	7	8	5	6	5	6	5	1	5	0.0043	0.55685	0.55685	0.345833	0.877033	0.683051	0.123096	0.145089	9.7e-05	0.548424	0.512822	0.649148	0.749318	0.749318	0.552217	0.675585	0.675585
OG0000545	365	4	4	5	4	4	8	6	7	6	6	6	5	5	5	5	4	5	5	12	6	6	3	1	3	14	6	5	6	7	11	7	0.0027	0.55685	0.55685	0.345833	0.290969	0.00768	0.020741	0.862635	0.434505	0.548424	0.512822	0.649148	0.749318	0.749318	0.552217	0.675585	0.270185
OG0000609	412	2	7	5	5	7	5	6	10	5	5	5	5	3	4	3	3	3	4	6	5	5	4	10	6	7	6	5	6	5	4	5	0.0256	0.023978	0.10414	0.697969	0.863415	0.093557	0.228721	0.355305	0.008594	0.540866	0.510719	0.629747	0.155479	0.340635	0.542465	0.61971	0.61971
OG0000662	455	5	6	5	5	8	7	7	9	5	5	5	2	0	2	1	1	1	2	7	5	5	12	5	7	8	6	5	6	4	2	4	0.0029	0.839273	0.337518	0.697969	0.863415	0.108472	0.66686	0.114986	0.017585	0.540866	0.510719	0.629747	0.636472	0.004844	0.52195	0.545784	0.545784
OG0000111	46	20	12	15	13	12	21	16	22	15	15	15	15	14	15	14	16	15	15	21	15	15	6	3	5	10	7	6	7	12	9	12	0.0001	0.045551	0.23862	0.833682	0.508488	0.000714	0.000188	0.602421	0.012119	0.608441	0.53114	0.764629	0.868489	0.63037	0.633924	0.515919	0.296755
OG0000243	134	13	9	10	7	7	13	10	14	10	10	10	12	9	9	8	7	8	9	17	10	10	7	9	8	6	7	6	7	8	2	7	0	0.094043	0.686459	0.78782	0.20556	0.001798	0.004902	0.896996	0.082759	0.576793	0.521095	0.711456	0.036361	0.82128	0.588139	0.735868	0.371066
OG0000543	363	4	4	5	4	5	6	5	7	5	5	5	3	3	3	3	3	3	3	12	5	5	8	3	6	17	7	6	7	5	5	5	0.0346	0.55685	0.55685	0.697969	0.608768	0.629747	0.078376	0.846908	0.137814	0.540866	0.510719	0.629747	0.683116	0.683116	0.53238	0.61971	0.61971
OG0000837	574	2	5	4	9	3	4	4	9	4	4	4	3	1	2	2	2	2	2	1	4	4	6	11	8	8	7	6	7	5	7	5	0.0049	0.15032	0.285654	0.670307	0.004219	0.16458	0.60847	0.824778	0.003752	0.533111	0.508603	0.60847	0.079663	0.20519	0.52195	0.585379	0.585379
OG0000983	683	2	1	2	3	1	4	2	3	2	2	2	2	2	2	2	2	2	2	1	2	2	27	2	9	8	7	6	7	2	2	2	0.0001	0.729234	0.347221	0.599453	0.191135	0.089163	0.00244	0.739903	0.185667	0.516986	0.50433	0.559421	0.636472	0.636472	0.52195	0.585379	0.585379
OG0000086	34	19	15	17	15	14	26	19	23	17	17	17	18	16	16	15	16	16	16	32	17	17	4	9	7	9	8	7	8	11	2	10	0.0001	0.362512	0.478147	0.845845	0.535253	0.000138	4e-06	0.38139	0.041874	0.620033	0.535068	0.780609	0.177782	0.873317	0.640731	0.530209	0.821649
OG0000258	144	10	7	9	7	6	10	8	10	9	9	9	9	8	8	7	8	8	8	19	9	9	8	6	8	15	9	8	9	9	7	9	0.0069	0.478233	0.326817	0.774602	0.389837	0.013512	0.034144	0.681824	0.528461	0.56997	0.519047	0.697872	0.281069	0.808091	0.579599	0.371066	0.735868
OG0000188	95	6	4	7	40	8	14	10	9	9	9	9	9	4	7	7	7	7	7	6	8	8	23	8	12	8	10	9	10	7	4	7	0.0003	0.624692	0.050244	0.047188	0	0.020523	0.000379	0.495801	0.899629	0.56997	0.519047	0.123096	0.120649	0.009089	0.570772	0.718304	0.718304
OG0000260	146	2	7	6	7	4	6	6	10	7	7	7	6	5	6	7	8	7	6	9	7	7	45	9	17	7	11	10	11	7	7	7	0.0004	0.007681	0.38143	0.380748	0.887207	0.00768	0.649148	0.638702	0.075977	0.55579	0.51491	0.66686	0.772977	0.433673	0.561649	0.718304	0.157328
OG0000146	65	10	9	11	8	8	11	10	18	11	11	11	12	10	11	12	13	12	11	14	11	11	10	10	11	28	14	13	14	11	9	11	0.0101	0.701215	0.37562	0.799389	0.227133	0.020523	0.151389	0.712597	0.007413	0.583445	0.52313	0.723924	0.352802	0.569679	0.604401	0.788184	0.250074
[truncated: 14 more columns]

## Sheet: Table S9
Table S9. Genetic networks identified with significant gene losses in Douglas-fir
#node	Identifier	Annotation	Network/Process
TUB1	AT1G75780.1	tubulin beta	Tubulin/Histone
TUB2	AT5G62690.1	tubulin beta chain 2	Tubulin/Histone
TUB3	AT5G62700.1	tubulin beta chain 3	Tubulin/Histone
TUB4	AT5G44340.1	tubulin beta chain 4	Tubulin/Histone
TUB5	AT1G20010.1	tubulin beta-5 chain	Tubulin/Histone
TUB6	AT5G12250.1	beta-6 tubulin	Tubulin/Histone
TUB7	AT2G29550.1	tubulin beta	Tubulin/Histone
TUB8	AT5G23860.1	tubulin beta 8	Tubulin/Histone
TUB9	AT4G20890.1	tubulin beta-9 chain	Tubulin/Histone
AT2G28720	AT2G28720.1	histone H2B	Tubulin/Histone
AT2G37470	AT2G37470.1	histone H2B	Tubulin/Histone
AT3G09480	AT3G09480.1	histone H2B	Tubulin/Histone
AT3G53650	AT3G53650.1	histone H2B	Tubulin/Histone
AT5G02570	AT5G02570.1	histone H2B	Tubulin/Histone
HTB1	AT1G07790.1	histone H2B	Tubulin/Histone
HTB11	AT3G46030.1	histone H2B	Tubulin/Histone
HTB2	AT5G22880.1	histone B2	Tubulin/Histone
HTB4	AT5G59910.1	histone H2B	Tubulin/Histone
HTB9	AT3G45980.1	histone H2B	Tubulin/Histone
CKL6	AT4G28540.1	casein kinase I-like 6	Tubulin/Histone
bZIP2	AT2G18160.1	basic leucine-zipper 2	Leucine zipper TF
bZIP44	AT1G75390.1	basic leucine-zipper 44	Leucine zipper TF
BZIP53	AT3G62420.1	basic region/leucine zipper motif 53	Leucine zipper TF
bZIP6	AT2G22850.1	basic leucine-zipper 6	Leucine zipper TF
GBF6	AT4G34590.1	G-box binding factor 6	Leucine zipper TF
ATB2	AT1G60710.1	NAD(P)-linked oxidoreductase-like protein	Leucine zipper TF
SWEET1	AT1G21460.1	Nodulin MtN3-like protein	Transport of sugars
SWEET3	AT5G53190.1	Nodulin MtN3 family protein	Transport of sugars
SWEET6	AT1G66770.1	nodulin MtN3-like protein	Transport of sugars
SWEET13	AT5G50800.1	nodulin MtN3-like protein	Transport of sugars
SWEET17	AT4G15920.1	nodulin MtN3-like protein	Transport of sugars
SWEET11	AT3G48740.1	Nodulin MtN3-like protein	Transport of sugars
SWEET4	AT3G28007.1	nodulin MtN3-like protein	Transport of sugars
SWEET16	AT3G16690.1	nodulin MtN3-like protein	Transport of sugars
SWEET8	AT5G40260.1	protein RUPTURED POLLEN GRAIN 1	Transport of sugars
SWEET9	AT2G39060.1	Nodulin MtN3-like protein	Transport of sugars
SWEET12	AT5G23660.1	MTN3-like protein	Transport of sugars
SWEET7	AT4G10850.1	nodulin MtN3-like protein	Transport of sugars
SWEET10	AT5G50790.1	nodulin MtN3-like protein	Transport of sugars
AT1G47610	AT1G47610.1	WD40 domain-containing protein	Transport of sugars
BETA-VPE	AT1G62710.1	beta vacuolar processing enzyme	Transport of sugars
AtVEX1	AT5G62850.1	nodulin MtN3-like protein	Transport of sugars
TF: transcription factor.

## Sheet: Table S10
Table S10. Genetic networks identified with significant gene duplications in Douglas-fir
#node	Identifier	Annotation	Network/Process
PPME1	AT1G69940.1	pectinesterase PPME1	Pectin catabolism
PE11	AT2G21610.1	pectinesterase 11	Pectin catabolism
PMR6	AT3G54920.1	putative pectate lyase 13	Pectin catabolism
QRT1	AT5G55590.1	QUARTET 1 Pectinesterase	Pectin catabolism
AT1G04680	AT1G04680.1	putative pectate lyase 1	Pectin catabolism
AT1G67750	AT1G67750.1	putative pectate lyase 5	Pectin catabolism
AT3G07010	AT3G07010.1	putative pectate lyase 8	Pectin catabolism
AT3G24230	AT3G24230.1	putative pectate lyase 9	Pectin catabolism
AT3G24670	AT3G24670.1	pectate lyase	Pectin catabolism
AT3G27400	AT3G27400.1	pectate lyase	Pectin catabolism
AT3G53190	AT3G53190.1	putative pectate lyase 12	Pectin catabolism
AT4G13210	AT4G13210.2	putative pectate lyase 14	Pectin catabolism
AT4G13710	AT4G13710.1	pectate lyase	Pectin catabolism
AT4G24780	AT4G24780.1	putative pectate lyase 18	Pectin catabolism
AT5G04310	AT5G04310.1	pectate lyase family protein	Pectin catabolism
AT5G48900	AT5G48900.1	putative pectate lyase 20	Pectin catabolism
AT5G19730	AT5G19730.1	pectinesterase	Pectin catabolism
AT5G63180	AT5G63180.1	putative pectate lyase 22	Pectin catabolism
AT5G55720	AT5G55720.1	pectate lyase	Pectin catabolism
CYCP4;1	AT2G44740.1	cyclin p4	Pectin catabolism
EXPA1	AT1G69530.3	expansin A1	Pectin catabolism
EXPA11	AT1G20190.1	expansin 11	Pectin catabolism
EXPA4	AT2G39700.1	expansin A4	Pectin catabolism
EXPA15	AT2G03090.1	expansin A15	Pectin catabolism
EXPB3	AT4G28250.1	expansin B3	Pectin catabolism
EXPA8	AT2G40610.1	expansin A8	Pectin catabolism
EXPA6	AT2G28950.1	expansin A6	Pectin catabolism
TIP2;2	AT4G17340.1	putative aquaporin TIP2-2	Water homeostasis
TIP2	AT3G26520.1	aquaporin TIP1-2	Water homeostasis
TIP3;1	AT1G73190.1	aquaporin TIP3-1	Water homeostasis
GAMMA-TIP	AT2G36830.1	aquaporin TIP1-1	Water homeostasis
DELTA-TIP	AT3G16240.1	aquaporin TIP2-1	Water homeostasis
NLM1	AT4G19030.1	aquaporin NIP1-1	Water homeostasis
JAZ1	AT1G19180.1	Repressor of jasmonate responses	Jasmonate regulation
JAZ12	AT5G20900.1	Repressor of jasmonate responses	Jasmonate regulation
JAZ5	AT1G17380.1	Repressor of jasmonate responses	Jasmonate regulation
JAZ6	AT1G72450.1	Repressor of jasmonate responses	Jasmonate regulation
TET8	AT2G23810.1	Regulation of cell differentiation	Jasmonate regulation
TET9	AT4G30430.1	Regulation of cell differentiation	Jasmonate regulation
PP2-B13	AT1G56240.1	phloem protein 2-B13	Jasmonate regulation

## Sheet: Table S11
Table S11. Summary of gene-family evolution examined within Pinaceae (Species abbreviations as in Figure 3)
		Genes in	% Genes in	Genes analyzed		All						Viterbi P ≤ 0.05
	All genes	OrthoGroups	OrthoGroups	with CAFE		Expanded families	Contracted families	Gene duplications	Gene losses	% Changed families		Families	Expanded families	Contracted families	Gene duplications	Gene losses
Pita	83861	36823	43.9096	24423		2117	3635	5067	4671	35.6868		382	268	114	2380	1441
Pila	84988	39785	46.8125	26736		2181	3699	7295	4586	36.481		463	383	80	4738	1110
PINES	na	na	na	24027		1336	2990	2181	3685	26.8396		239	161	78	1221	857
Pabies	54626	34675	63.4771	24453		2247	3493	3739	4817	35.6124		461	133	328	1156	1810
PINES+SPRUCE	na	na	na	25531		17	161	23	243	1.10436		47	3	44	23	243
Psme	63621	29856	46.9279	28446		1942	2123	5693	2998	25.2203		481	102	191	3531	1102
PINACEAE	na	na	na	25751		na	na	na	na	na		na	na	na	na	na

## Sheet: Table S12
Table S12. Summary of gene-family evolution and lineage-specific expansions within Pinaceae (Species abbreviations and nodes (uppercase) as in Figure 3, Boldcase: Viterbi branch-specific P-value)
Description	'ID'	Pita	Pila	PINES	Pabies	PINES+SPRUCE	Psme_x0007_	PINACEAE	'Family-wide P-value'	Pita	Pila	PINES	Pabies	PINES+SPRUCE	Psme
OG0000012	1	69	10	31	49	28	4	25	0.0001	0	0	0.405882	1e-06	0.030451	0
OG0000014	2	42	28	33	57	30	2	27	0.0001	0.070906	0.324869	0.422219	0	0.035686	0
OG0000015	3	52	5	27	64	29	3	26	0.0001	2e-06	0	0.659919	0	0.033034	0
OG0000016	4	9	58	28	14	27	42	28	0.0001	1e-06	0	0.744528	8.6e-05	0.533344	0.000525
OG0000017	5	74	0	25	1	22	45	24	0.0001	0	0	0.347518	0	0.13927	0
OG0000018	6	16	89	26	2	8	6	8	0.0001	0.013086	0	0	0.000947	0.665716	0.348498
OG0000020	7	45	39	31	14	16	8	15	0	0.005112	0.079118	2.6e-05	0.50862	0.191647	0.004208
OG0000021	8	8	5	11	6	21	81	26	0.0001	0.317884	0.02643	0.002044	0	0.000301	0
OG0000022	9	4	4	7	1	16	87	22	0.0001	0.209002	0.209002	0.00089	0	1.3e-05	0
OG0000023	10	2	83	15	1	6	6	6	0.0001	1e-06	0	0.000243	0.001319	0.63376	0.873147
OG0000025	11	0	0	2	3	14	88	21	0.0001	0.134709	0.134709	0	2e-06	1e-06	0
OG0000026	12	10	1	9	1	17	77	22	0.0001	0.613018	0.000244	0.00522	0	0.000143	0
OG0000027	13	5	73	16	6	7	2	7	0.0001	0.000249	0	0.000262	0.659499	0.650368	0.002677
OG0000028	14	17	65	21	1	4	2	4	0.0001	0.328205	0	0	0.022067	0.596275	0.188824
OG0000029	15	10	52	21	1	15	22	15	0	0.001826	0	0.04651	0	0.745918	0.011507
OG0000030	16	35	6	19	36	20	8	19	0	0.000167	6e-05	0.819394	8e-06	0.233827	4.5e-05
OG0000031	17	1	79	12	2	4	2	4	0.0001	5e-06	0	0.000115	0.186566	0.596275	0.188824
OG0000032	18	10	14	16	43	24	16	23	0	0.064115	0.599407	0.024541	2e-06	0.271918	0.026689
OG0000033	19	1	77	12	2	4	2	4	0.0001	5e-06	0	0.000115	0.186566	0.596275	0.188824
OG0000037	20	3	71	14	2	5	4	5	0.0001	5.8e-05	0	7.2e-05	0.037118	0.615774	0.598786
OG0000039	22	13	32	19	20	17	13	17	0.0039	0.116682	0.001653	0.457446	0.236663	0.762292	0.176586
OG0000040	23	12	25	18	29	19	11	18	0.0003	0.107179	0.058848	0.814645	0.002118	0.223673	0.01296
OG0000041	24	1	65	12	6	6	3	6	0.0001	5e-06	0	0.005549	0.872262	0.63376	0.055635
OG0000042	25	63	5	14	4	5	3	5	0.0001	0	0.001525	7.2e-05	0.596539	0.615774	0.236605
OG0000043	26	10	50	18	5	10	10	10	0	0.021886	0	0.002874	0.016134	0.693062	0.904278
OG0000044	27	7	16	14	34	19	12	19	0	0.022496	0.469481	0.141851	1.9e-05	0.776572	0.015346
OG0000045	28	4	58	13	2	6	5	6	0.0001	0.00105	0	0.001379	0.013609	0.63376	0.63393
OG0000047	29	2	57	13	1	7	8	7	0.0001	1.8e-05	0	0.009715	0.000224	0.650368	0.467618
OG0000049	30	38	16	19	12	10	1	9	0	2e-05	0.450143	0.001595	0.280709	0.12052	1.5e-05
OG0000050	31	0	0	1	1	9	66	14	0.0001	0.325493	0.325493	5.3e-05	1.4e-05	1.7e-05	0
OG0000051	32	5	21	13	0	14	41	16	0	0.004724	0.01806	0.783598	0	0.036668	0
OG0000052	33	23	1	14	20	19	21	19	0	0.00957	0	0.141851	0.66516	0.776572	0.43949
OG0000053	34	41	15	18	0	8	9	8	0	1e-06	0.437563	0.000251	2e-06	0.665716	0.498593
OG0000054	35	2	59	10	2	3	1	3	0.0001	0.000466	0	0.000174	0.484917	0.575118	0.135793
OG0000055	36	19	1	12	8	16	35	18	0	0.021638	5e-06	0.20439	0.0017	0.044665	2e-06
OG0000056	37	2	58	10	2	3	1	3	0.0001	0.000466	0	0.000174	0.484917	0.575118	0.135793
OG0000057	38	5	39	14	12	11	7	11	0	0.001525	0	0.182766	0.565048	0.705249	0.061024
OG0000058	39	23	0	13	32	17	8	16	0	0.002961	0	0.218194	8e-06	0.202586	0.001794
OG0000059	40	12	0	10	34	19	16	19	0	0.389006	2e-06	0.003242	1.9e-05	0.776572	0.345997
OG0000060	41	7	3	8	3	13	49	16	0	0.745781	0.028974	0.051819	4e-06	0.004572	0
OG0000061	42	13	22	16	25	14	2	13	0	0.409665	0.087525	0.411605	0.000236	0.168974	0
OG0000062	43	0	1	2	2	10	59	14	0.0001	0.134709	0.487153	0.000112	3.1e-05	0.000257	0
OG0000063	44	3	52	11	2	5	5	5	0	0.00134	0	0.002811	0.037118	0.615774	0.858953
OG0000064	45	2	50	12	4	7	6	7	0	6.4e-05	0	0.018064	0.1223	0.650368	0.661454
OG0000065	46	2	54	10	1	4	4	4	0	0.000466	0	0.001321	0.022067	0.596275	0.838816
OG0000066	47	2	1	4	4	12	53	16	0	0.281229	0.056386	0.000614	0.000203	0.000429	0
OG0000067	48	2	5	7	48	15	5	14	0	0.012023	0.419818	0.003097	0	0.180443	0.000137
OG0000068	49	4	7	8	3	13	46	16	0	0.113412	0.745781	0.051819	4e-06	0.004572	0
OG0000069	50	5	21	13	5	14	28	15	0	0.004724	0.01806	0.783598	0.000128	0.390284	5.4e-05
OG0000070	51	31	9	15	15	11	4	11	0	5.2e-05	0.055937	0.085791	0.093291	0.705249	0.001059
OG0000072	52	7	4	9	15	17	32	18	0	0.479238	0.038773	0.00522	0.521698	0.43263	5.2e-05
OG0000073	53	22	6	13	23	14	6	13	0	0.007301	0.011944	0.783598	0.001584	0.168974	0.002276
OG0000074	54	10	38	14	5	6	4	6	0	0.229858	0	0.000531	0.631839	0.63376	0.278818
OG0000075	55	0	0	1	1	8	56	12	0	0.325493	0.325493	0.000129	3.9e-05	0.00014	0
OG0000076	56	4	47	11	3	5	3	5	0	0.006522	0	0.002811	0.234077	0.615774	0.236605
OG0000077	57	6	2	6	1	11	48	14	0	0.901359	0.040967	0.035206	0	0.003173	0
OG0000078	58	1	47	11	0	7	9	7	0	1.7e-05	0	0.057157	1.4e-05	0.650368	0.200782
OG0000079	59	27	15	16	12	10	2	9	0	0.002897	0.940484	0.016274	0.280709	0.12052	0.000181
OG0000080	60	20	18	16	12	11	6	11	0.019	0.203338	0.499562	0.054617	0.565048	0.705249	0.021775
OG0000081	61	0	54	7	1	2	1	2	0	0.00011	0	0.000937	0.390103	0.552141	0.392646
OG0000082	62	23	2	11	2	12	29	13	0	0.000395	0.000231	0.765946	2e-06	0.357612	1e-06
OG0000083	63	21	23	16	6	8	5	8	0.0004	0.117739	0.045195	0.001183	0.3457	0.665716	0.14853
OG0000084	64	22	15	15	5	11	13	11	0.003	0.03873	0.815585	0.085791	0.003819	0.705249	0.306757
OG0000086	65	3	47	10	2	4	3	4	0	0.00453	0	0.001321	0.186566	0.596275	0.552181
OG0000087	66	10	21	14	15	13	9	13	0.05	0.229858	0.032597	0.634964	0.345049	0.727061	0.123774
OG0000089	67	2	2	5	40	15	10	15	0	0.138796	0.138796	0.000107	0	0.745918	0.047059
OG0000091	68	10	24	14	11	11	9	11	0.0183	0.229858	0.003963	0.182766	0.908424	0.705249	0.425672
OG0000092	69	4	4	6	5	12	40	14	0	0.381928	0.381928	0.017038	0.001504	0.029121	0
OG0000094	70	1	50	8	0	2	2	2	0	0.000501	0	0.000234	0.031859	0.552141	0.758042
OG0000096	71	2	6	6	2	11	42	14	0	0.040967	0.901359	0.035206	1.1e-05	0.003173	0
OG0000097	72	0	50	7	1	2	1	2	0	0.00011	0	0.000937	0.390103	0.552141	0.392646
OG0000098	73	3	0	4	2	10	47	13	0	0.636103	0.007062	0.005554	3.1e-05	0.002579	0
OG0000099	74	1	49	7	1	2	1	2	0	0.001862	0	0.000937	0.390103	0.552141	0.392646
OG0000100	75	11	23	13	11	10	6	10	0.007	0.55883	0.002961	0.162682	0.545181	0.693062	0.050073
OG0000101	76	23	14	14	10	9	4	9	0.0012	0.00957	0.809006	0.034451	0.522404	0.679915	0.012243
OG0000103	77	31	8	12	6	7	5	7	0	1e-06	0.194445	0.018064	0.659499	0.650368	0.315896
OG0000104	78	2	47	8	0	2	1	2	0	0.005804	0	0.000234	0.031859	0.552141	0.392646
OG0000105	79	0	47	7	0	3	3	3	0	0.00011	0	0.007735	0.010444	0.575118	0.808218
OG0000106	80	2	17	11	18	14	12	14	0.0003	0.000231	0.03958	0.317225	0.09225	0.736827	0.481606
OG0000108	82	3	1	4	1	9	44	12	0	0.636103	0.056386	0.020923	1.4e-05	0.002053	0
OG0000110	83	1	6	6	2	10	40	13	0	0.006973	0.901359	0.110552	3.1e-05	0.002579	0
OG0000112	84	3	38	10	0	6	8	6	0	0.00453	0	0.040827	3.9e-05	0.63376	0.168821
OG0000113	85	18	14	13	14	10	2	9	0.0002	0.083761	0.676465	0.162682	0.078702	0.12052	0.000181
OG0000114	86	36	5	10	4	5	3	5	0	0	0.049485	0.007349	0.596539	0.615774	0.236605
OG0000115	87	1	45	7	1	2	1	2	0	0.001862	0	0.000937	0.390103	0.552141	0.392646
OG0000116	88	14	2	10	14	14	17	14	0.0019	0.108399	0.000466	0.175098	0.919318	0.736827	0.195053
OG0000117	89	20	17	14	8	7	2	7	0.0001	0.067641	0.296566	0.002443	0.464934	0.650368	0.002677
OG0000119	91	20	8	12	14	10	5	10	0.0016	0.013899	0.194445	0.328859	0.078702	0.693062	0.016679
OG0000120	92	2	1	3	2	9	42	12	0	0.578464	0.214105	0.003653	0.00017	0.002053	0
OG0000121	93	13	17	13	13	10	4	10	0.0062	0.801672	0.157995	0.162682	0.125464	0.693062	0.002682
OG0000122	94	0	10	7	0	10	37	12	0	0.00011	0.138687	0.236077	0	0.022131	0
OG0000123	95	11	14	12	20	11	1	10	0	0.931127	0.433366	0.604386	0.000527	0.13301	3e-06
OG0000125	96	2	2	4	3	9	39	12	0	0.281229	0.281229	0.020923	0.001612	0.002053	0
OG0000128	99	13	14	12	5	10	14	10	0.0263	0.663558	0.433366	0.328859	0.016134	0.693062	0.080376
OG0000129	100	10	35	12	0	2	1	2	0	0.542332	0	1e-06	0.031859	0.552141	0.392646
OG0000130	101	29	5	11	5	7	6	7	0	2e-06	0.02643	0.057157	0.31313	0.650368	0.661454
OG0000131	102	17	13	12	11	9	4	9	0.0122	0.102687	0.663558	0.141817	0.255444	0.679915	0.012243
OG0000132	103	1	6	5	0	8	38	11	0	0.026372	0.48783	0.185906	2e-06	0.001596	0
OG0000133	104	3	29	10	1	7	11	7	0	0.00453	0	0.098776	0.000224	0.650368	0.038507
OG0000134	105	39	0	7	4	4	1	4	0	0	0.00011	0.06495	0.837624	0.596275	0.022669
OG0000135	106	43	0	5	0	1	1	1	0	0	0.001737	0.001064	0.242993	0.527168	0.669144
OG0000136	107	2	32	9	8	6	1	6	0	0.001645	0	0.077556	0.166641	0.63376	0.001384
OG0000137	108	15	11	12	15	10	2	9	0.0002	0.25866	0.931127	0.328859	0.027526	0.12052	0.000181
OG0000138	109	4	22	10	3	9	14	9	0	0.012914	0.000229	0.564649	0.001612	0.679915	0.021546
OG0000140	111	1	1	3	9	12	31	14	0	0.214105	0.214105	8.7e-05	0.232599	0.029121	0
OG0000141	112	0	34	8	7	5	1	5	0	2.8e-05	0	0.097585	0.133299	0.615774	0.004041
OG0000142	113	3	0	3	1	7	38	10	0	0.854833	0.02969	0.033817	0.000224	0.001204	0
OG0000143	114	6	33	9	2	3	1	3	0	0.268478	0	0.000637	0.484917	0.575118	0.135793
OG0000144	115	20	4	10	15	9	2	9	0	0.001406	0.012914	0.564649	0.006433	0.679915	0.000181
OG0000145	116	9	2	8	19	12	11	12	0.0019	0.590345	0.005804	0.14366	0.005329	0.716557	0.742634
OG0000147	118	21	6	10	11	8	3	8	0.0001	0.000808	0.155406	0.273727	0.090008	0.665716	0.004594
OG0000148	119	6	7	8	4	10	24	11	0	0.451825	0.745781	0.447185	0.002558	0.320681	6e-06
OG0000149	120	5	16	9	3	9	17	9	0.0001	0.134682	0.014528	0.908734	0.001612	0.679915	0.000817
OG0000150	121	14	19	12	4	6	4	6	0.002	0.433366	0.021638	0.005549	0.276132	0.63376	0.278818
OG0000151	122	1	4	4	1	8	35	10	0	0.056386	0.87697	0.046017	3.9e-05	0.015822	0
OG0000152	123	3	27	9	0	7	11	7	0	0.008943	0	0.241642	1.4e-05	0.650368	0.038507
OG0000153	124	3	0	3	0	7	38	10	0	0.854833	0.02969	0.033817	1.4e-05	0.001204	0
OG0000154	125	17	8	10	13	8	2	8	0.0002	0.020383	0.503012	0.273727	0.015142	0.665716	0.000998
OG0000155	126	18	7	10	6	8	9	8	0.0326	0.00732	0.29432	0.273727	0.3457	0.665716	0.498593
OG0000157	127	6	0	5	33	9	1	8	0	0.48783	0.001737	0.059155	0	0.107796	4.2e-05
OG0000158	128	8	14	10	13	9	5	9	0.0362	0.503012	0.108399	0.564649	0.064325	0.679915	0.03965
OG0000159	129	0	38	6	1	2	1	2	0	0.000435	0	0.003657	0.390103	0.552141	0.392646
OG0000160	130	5	19	10	2	9	14	9	0	0.049485	0.002714	0.564649	0.00017	0.679915	0.021546
OG0000161	131	26	9	10	1	4	4	4	0	7e-06	0.773301	0.001321	0.022067	0.596275	0.838816
OG0000162	132	3	14	9	7	10	16	10	0.0018	0.008943	0.059214	0.743141	0.191728	0.693062	0.009259
OG0000163	133	2	1	3	2	8	35	10	0	0.578464	0.214105	0.015036	0.000947	0.015822	0
OG0000164	134	2	37	7	0	2	1	2	0	0.012023	0	0.000937	0.031859	0.552141	0.392646
OG0000165	135	0	23	8	0	8	17	9	0	2.8e-05	4e-06	0.90285	2e-06	0.278754	0.000817
OG0000166	136	13	8	10	15	9	3	9	0.0009	0.215109	0.503012	0.564649	0.006433	0.679915	0.001694
OG0000167	137	1	0	2	3	8	35	10	0	0.487153	0.134709	0.002246	0.004406	0.015822	0
OG0000168	138	2	32	7	3	3	2	3	0	0.012023	0	0.007735	0.80681	0.575118	0.487472
OG0000169	139	6	24	10	7	6	2	6	0	0.155406	3.4e-05	0.040827	0.427949	0.63376	0.014052
OG0000170	140	6	3	6	5	10	25	11	0	0.901359	0.175123	0.110552	0.016134	0.320681	2e-06
OG0000171	141	2	34	7	0	3	3	3	0	0.012023	0	0.007735	0.010444	0.575118	0.808218
OG0000173	142	0	4	4	4	9	30	11	0	0.007062	0.87697	0.020923	0.011821	0.018883	0
OG0000175	143	15	0	8	21	9	2	9	0	0.00971	2.8e-05	0.728932	6e-06	0.679915	0.000181
OG0000176	144	4	19	9	4	8	11	8	0.0002	0.038773	0.000864	0.53978	0.029161	0.665716	0.091621
OG0000177	145	16	19	11	2	3	1	3	0	0.08806	0.010302	4.6e-05	0.484917	0.575118	0.135793
OG0000178	146	10	12	10	1	9	15	9	0.0001	0.924427	0.389006	0.564649	1.4e-05	0.679915	0.006683
OG0000182	148	3	1	4	3	8	30	10	0	0.636103	0.056386	0.046017	0.004406	0.015822	0
OG0000183	149	10	10	10	13	9	4	9	0.0307	0.924427	0.924427	0.564649	0.064325	0.679915	0.012243
OG0000184	150	0	0	2	26	12	11	12	0	0.134709	0.134709	1e-05	4e-06	0.716557	0.742634
OG0000186	152	3	5	5	2	8	27	10	0	0.336445	0.891221	0.185906	0.000947	0.015822	0
OG0000187	153	5	24	9	4	5	4	5	0	0.134682	1.4e-05	0.026532	0.596539	0.615774	0.598786
OG0000188	154	22	9	10	4	5	2	5	0	0.000229	0.773301	0.007349	0.596539	0.615774	0.038039
OG0000192	157	4	25	9	0	6	8	6	0	0.038773	3e-06	0.077556	3.9e-05	0.63376	0.168821
OG0000194	158	1	32	7	0	4	4	4	0	0.001862	0	0.06495	0.00154	0.596275	0.838816
OG0000195	159	2	8	6	5	9	21	10	0.0001	0.040967	0.260771	0.211851	0.038622	0.300393	6.7e-05
OG0000199	161	18	15	11	2	3	1	3	0	0.01697	0.125238	4.6e-05	0.484917	0.575118	0.135793
OG0000200	162	2	27	8	2	5	5	5	0	0.005804	0	0.097585	0.037118	0.615774	0.858953
OG0000202	163	14	6	9	4	8	12	8	0.0096	0.059214	0.268478	0.53978	0.029161	0.665716	0.051696
OG0000205	166	8	20	9	5	5	3	5	0.001	0.760716	0.000431	0.026532	0.857937	0.615774	0.236605
OG0000206	167	18	10	10	7	6	1	6	0.0001	0.00732	0.924427	0.040827	0.427949	0.63376	0.001384
OG0000207	168	10	3	7	5	9	17	9	0.0007	0.138687	0.057571	0.422173	0.038622	0.679915	0.000817
OG0000210	170	4	28	8	2	3	1	3	0	0.113412	0	0.002262	0.484917	0.575118	0.135793
OG0000212	171	1	31	5	1	2	2	2	0	0.026372	0	0.013822	0.390103	0.552141	0.758042
OG0000213	172	4	29	7	1	2	1	2	0	0.209002	0	0.000937	0.390103	0.552141	0.392646
OG0000214	173	0	1	1	0	5	34	8	0	0.325493	0.728538	0.01413	0.000239	0.000609	0
OG0000215	174	5	19	8	8	6	2	6	0.0001	0.240105	0.000224	0.206268	0.166641	0.63376	0.014052
OG0000216	175	25	5	8	2	3	2	3	0	1e-06	0.240105	0.002262	0.484917	0.575118	0.487472
OG0000217	176	5	8	7	3	8	18	9	0.0004	0.419818	0.563182	0.712089	0.004406	0.278754	0.00036
OG0000218	177	9	6	8	3	8	16	8	0.001	0.590345	0.451825	0.90285	0.004406	0.665716	0.000499
OG0000219	178	3	20	8	5	6	6	6	0.0002	0.028974	0.000102	0.206268	0.631839	0.63376	0.873147
OG0000220	179	1	3	3	2	7	28	9	0	0.214105	0.854833	0.033817	0.00256	0.012966	0
OG0000221	180	15	9	9	8	6	2	6	0.0048	0.023818	0.920208	0.077556	0.166641	0.63376	0.014052
OG0000222	181	2	9	7	7	10	16	10	0.0034	0.012023	0.299307	0.236077	0.191728	0.693062	0.009259
OG0000223	182	15	8	9	10	7	1	7	0.0001	0.023818	0.760716	0.241642	0.072657	0.650368	0.000238
OG0000224	183	32	0	5	1	2	1	2	0	0	0.001737	0.013822	0.390103	0.552141	0.392646
OG0000225	184	2	27	7	0	4	5	4	0	0.012023	0	0.06495	0.00154	0.596275	0.331434
OG0000226	185	1	30	5	1	2	1	2	0	0.026372	0	0.013822	0.390103	0.552141	0.392646
OG0000227	186	18	6	9	6	6	3	6	0.0023	0.002807	0.268478	0.077556	0.872262	0.63376	0.055635
OG0000228	187	19	5	8	8	6	1	6	0	0.000224	0.240105	0.206268	0.166641	0.63376	0.001384
OG0000229	188	0	0	0	1	5	32	7	0	0.5	0.5	0.000604	0.003887	0.007947	0
OG0000230	189	3	11	7	16	8	3	8	0.0001	0.057571	0.090309	0.712089	0.000472	0.665716	0.004594
OG0000232	191	9	1	6	2	8	21	9	0	0.111187	0.006973	0.39368	0.000947	0.278754	7e-06
OG0000233	192	16	7	9	1	6	9	6	0.0001	0.014528	0.479238	0.077556	0.001319	0.63376	0.097874
OG0000234	193	4	21	8	5	5	3	5	0	0.113412	5.3e-05	0.097585	0.857937	0.615774	0.236605
OG0000236	195	15	15	10	1	3	2	3	0	0.073478	0.073478	0.000174	0.133962	0.575118	0.487472
OG0000237	196	1	25	6	3	4	4	4	0	0.006973	0	0.127026	0.549766	0.596275	0.838816
OG0000238	197	6	26	8	0	2	1	2	0	0.451825	0	0.000234	0.031859	0.552141	0.392646
OG0000241	198	0	2	2	0	5	31	7	0	0.134709	0.815016	0.055527	0.000239	0.007947	0
OG0000243	199	26	4	7	1	2	1	2	0	0	0.209002	0.000937	0.390103	0.552141	0.392646
OG0000244	200	9	5	7	14	8	4	8	0.0094	0.299307	0.419818	0.712089	0.008176	0.665716	0.029989
OG0000245	201	12	1	7	15	8	4	8	0	0.033263	0.001862	0.712089	0.001871	0.665716	0.029989
OG0000246	202	15	9	9	6	6	2	6	0.0055	0.023818	0.920208	0.077556	0.872262	0.63376	0.014052
OG0000248	204	8	0	6	10	10	14	10	0.001	0.260771	0.000435	0.110552	0.903661	0.693062	0.080376
OG0000249	205	5	23	7	3	3	1	3	0	0.419818	1e-06	0.007735	0.80681	0.575118	0.135793
OG0000250	206	6	17	8	4	5	5	5	0.0091	0.451825	0.001613	0.097585	0.596539	0.615774	0.858953
OG0000251	207	13	10	9	3	6	6	6	0.0484	0.091539	0.613018	0.077556	0.054399	0.63376	0.873147
OG0000252	208	13	3	8	11	8	5	8	0.0086	0.045645	0.028974	0.90285	0.090008	0.665716	0.14853
OG0000253	209	12	10	9	2	6	8	6	0.0141	0.191042	0.613018	0.077556	0.013609	0.63376	0.168821
OG0000254	210	18	4	8	6	6	4	6	0.0015	0.000902	0.113412	0.206268	0.872262	0.63376	0.278818
OG0000255	211	4	7	6	19	8	2	8	0	0.381928	0.529869	0.39368	1.3e-05	0.665716	0.000998
OG0000257	213	2	12	7	1	7	17	8	0	0.012023	0.033263	0.895625	0.000224	0.255647	0.000186
OG0000258	214	1	21	7	5	6	5	6	0	0.001862	6e-06	0.474493	0.631839	0.63376	0.63393
OG0000259	215	14	1	7	11	8	6	8	0.0004	0.006047	0.001862	0.712089	0.090008	0.665716	0.348498
OG0000261	216	1	2	3	8	9	20	10	0.0002	0.214105	0.578464	0.003653	0.700352	0.300393	0.000143
OG0000263	217	5	12	8	10	7	4	7	0.041	0.240105	0.074999	0.51024	0.072657	0.650368	0.124258
OG0000264	218	3	16	7	7	6	5	6	0.0066	0.057571	0.000887	0.474493	0.427949	0.63376	0.63393
OG0000266	219	1	21	6	7	5	2	5	0	0.006973	1e-06	0.430345	0.133299	0.615774	0.038039
OG0000268	221	24	0	6	4	4	3	4	0	0	0.000435	0.127026	0.837624	0.596275	0.552181
OG0000269	222	14	11	9	5	5	1	5	0.0015	0.059214	0.362749	0.026532	0.857937	0.615774	0.004041
OG0000271	224	14	9	9	6	6	2	6	0.0097	0.059214	0.920208	0.077556	0.872262	0.63376	0.014052
OG0000272	225	10	13	9	2	6	6	6	0.0122	0.613018	0.091539	0.077556	0.013609	0.63376	0.873147
OG0000273	226	1	27	5	2	2	1	2	0	0.026372	0	0.013822	0.756447	0.552141	0.392646
OG0000274	227	9	14	9	6	6	2	6	0.0097	0.920208	0.059214	0.077556	0.872262	0.63376	0.014052
OG0000276	229	6	4	6	1	7	20	8	0	0.901359	0.381928	0.6917	0.000224	0.255647	5e-06
OG0000277	230	6	9	7	0	7	16	8	0	0.727663	0.299307	0.895625	1.4e-05	0.255647	0.000499
OG0000279	232	11	1	7	10	8	8	8	0.0098	0.090309	0.001862	0.712089	0.228014	0.665716	0.892017
OG0000280	233	1	24	5	2	3	3	3	0	0.026372	0	0.086298	0.484917	0.575118	0.808218
OG0000281	234	2	14	7	7	7	7	7	0.0124	0.012023	0.006047	0.895625	0.882953	0.650368	0.883742
OG0000282	235	5	16	8	8	6	1	6	0.0001	0.240105	0.003247	0.206268	0.166641	0.63376	0.001384
OG0000283	236	4	20	7	4	4	2	4	0	0.209002	1.7e-05	0.06495	0.837624	0.596275	0.188824
OG0000284	237	0	0	0	1	4	29	6	0	0.5	0.5	0.003147	0.022067	0.005825	0
OG0000292	243	1	0	1	1	5	28	7	0	0.728538	0.325493	0.01413	0.003887	0.007947	0
OG0000293	244	0	29	4	0	1	1	1	0	0.007062	0	0.004895	0.242993	0.527168	0.669144
OG0000294	245	2	22	6	0	4	6	4	0	0.040967	0	0.127026	0.00154	0.596275	0.100856
OG0000297	246	0	23	6	2	4	4	4	0	0.000435	0	0.127026	0.186566	0.596275	0.838816
OG0000298	247	0	14	6	14	6	1	6	0	0.000435	0.001607	0.886444	0.000198	0.63376	0.001384
OG0000299	248	16	2	7	10	6	1	6	0	0.000887	0.012023	0.474493	0.025996	0.63376	0.001384
OG0000300	249	12	0	6	15	7	2	7	0	0.01225	0.000435	0.6917	0.000463	0.650368	0.002677
OG0000301	250	5	14	7	2	6	8	6	0.0034	0.419818	0.006047	0.474493	0.013609	0.63376	0.168821
OG0000302	251	10	3	6	13	7	3	7	0.0009	0.067128	0.175123	0.6917	0.004985	0.650368	0.021362
OG0000303	252	13	10	8	4	4	2	4	0.0132	0.045645	0.333067	0.015259	0.837624	0.596275	0.188824
OG0000304	253	15	5	7	6	5	3	5	0.0098	0.003319	0.419818	0.167766	0.383299	0.615774	0.236605
OG0000305	254	16	4	7	8	6	1	6	0	0.000887	0.209002	0.474493	0.166641	0.63376	0.001384
OG0000306	255	3	3	4	5	8	18	9	0.0006	0.636103	0.636103	0.046017	0.146353	0.278754	0.00036
OG0000309	258	17	7	8	3	4	2	4	0.0009	0.001613	0.745781	0.015259	0.549766	0.596275	0.188824
OG0000310	259	8	6	7	3	7	12	7	0.0231	0.563182	0.727663	0.895625	0.020732	0.650368	0.01074
OG0000311	260	3	6	5	1	6	19	7	0	0.336445	0.48783	0.666356	0.001319	0.230948	2e-06
OG0000312	261	1	25	5	1	2	2	2	0	0.026372	0	0.013822	0.390103	0.552141	0.758042
OG0000313	262	9	11	8	6	5	2	5	0.0349	0.590345	0.165489	0.097585	0.383299	0.615774	0.038039
OG0000314	263	1	1	2	4	7	22	8	0	0.487153	0.487153	0.005335	0.1223	0.255647	0
OG0000315	264	5	8	7	12	7	3	7	0.017	0.419818	0.563182	0.895625	0.010384	0.650368	0.021362
OG0000316	265	2	3	4	2	7	21	8	0	0.281229	0.636103	0.15831	0.00256	0.255647	1e-06
OG0000317	266	3	0	3	3	7	22	8	0	0.854833	0.02969	0.033817	0.020732	0.255647	0
OG0000318	267	2	13	6	5	6	8	6	0.0124	0.040967	0.003543	0.886444	0.631839	0.63376	0.168821
OG0000319	268	15	0	6	7	6	6	6	0.0001	0.000823	0.000435	0.886444	0.427949	0.63376	0.873147
OG0000320	269	3	11	7	10	7	4	7	0.0186	0.057571	0.090309	0.895625	0.072657	0.650368	0.124258
OG0000322	271	3	21	6	3	3	1	3	0	0.175123	1e-06	0.035409	0.80681	0.575118	0.135793
OG0000323	272	3	21	6	2	3	2	3	0	0.175123	1e-06	0.035409	0.484917	0.575118	0.487472
OG0000326	275	5	2	5	3	7	18	8	0.0001	0.891221	0.138796	0.360937	0.020732	0.255647	8.6e-05
OG0000327	276	7	19	7	0	2	2	2	0	0.909064	4.6e-05	0.000937	0.031859	0.552141	0.758042
OG0000328	277	4	3	4	0	6	21	7	0	0.87697	0.636103	0.322991	3.9e-05	0.230948	0
OG0000329	278	3	0	3	0	5	25	7	0	0.854833	0.02969	0.278736	0.000239	0.007947	0
OG0000330	279	1	19	5	2	4	5	4	0	0.026372	1e-06	0.374707	0.186566	0.596275	0.331434
OG0000331	280	1	24	5	1	2	1	2	0	0.026372	0	0.013822	0.390103	0.552141	0.392646
OG0000333	282	10	10	8	5	5	2	5	0.047	0.333067	0.333067	0.097585	0.857937	0.615774	0.038039
OG0000334	283	13	2	6	11	6	1	6	0	0.003543	0.040967	0.886444	0.006687	0.63376	0.001384
OG0000336	285	8	14	8	4	4	1	4	0.0018	0.915186	0.017389	0.015259	0.837624	0.596275	0.022669
OG0000337	286	1	24	5	1	2	1	2	0	0.026372	0	0.013822	0.390103	0.552141	0.392646
OG0000340	288	10	12	8	4	4	1	4	0.004	0.333067	0.074999	0.015259	0.837624	0.596275	0.022669
OG0000341	289	6	16	7	4	4	1	4	0.0007	0.727663	0.000887	0.06495	0.837624	0.596275	0.022669
OG0000342	290	4	13	7	7	6	3	6	0.015	0.209002	0.020293	0.474493	0.427949	0.63376	0.055635
OG0000344	291	12	7	7	6	5	2	5	0.028	0.033263	0.909064	0.167766	0.383299	0.615774	0.038039
OG0000345	292	4	5	5	15	7	3	7	0.0011	0.675825	0.891221	0.360937	0.000463	0.650368	0.021362
OG0000346	293	18	3	6	5	4	1	4	0	2.4e-05	0.175123	0.127026	0.328816	0.596275	0.022669
OG0000349	296	2	2	3	3	6	20	7	0	0.578464	0.578464	0.129337	0.054399	0.230948	0
OG0000350	297	0	25	4	1	2	1	2	0	0.007062	0	0.097051	0.390103	0.552141	0.392646
OG0000351	298	1	4	4	2	6	20	7	0	0.056386	0.87697	0.322991	0.013609	0.230948	0
OG0000353	300	1	2	2	1	5	23	7	0	0.487153	0.815016	0.055527	0.003887	0.007947	0
OG0000354	301	8	10	8	7	6	2	6	0.0419	0.915186	0.333067	0.206268	0.427949	0.63376	0.014052
OG0000356	303	2	1	3	2	6	22	7	0	0.578464	0.214105	0.129337	0.013609	0.230948	0
OG0000357	304	3	20	6	1	3	3	3	0	0.175123	3e-06	0.035409	0.133962	0.575118	0.808218
OG0000358	305	11	9	8	6	5	1	5	0.0064	0.165489	0.590345	0.097585	0.383299	0.615774	0.004041
OG0000359	306	1	24	5	1	2	1	2	0	0.026372	0	0.013822	0.390103	0.552141	0.392646
OG0000361	308	17	4	6	2	4	4	4	0.0007	6.8e-05	0.381928	0.127026	0.186566	0.596275	0.838816
OG0000362	309	2	1	2	1	5	23	7	0	0.815016	0.487153	0.055527	0.003887	0.007947	0
OG0000363	310	4	10	6	3	6	10	6	0.0234	0.381928	0.067128	0.886444	0.054399	0.63376	0.02672
OG0000364	311	11	10	8	0	5	6	5	0.0006	0.165489	0.333067	0.097585	0.000239	0.615774	0.386027
OG0000365	312	2	21	5	0	3	4	3	0	0.138796	0	0.086298	0.010444	0.575118	0.26442
OG0000366	313	5	20	6	0	2	2	2	0	0.705064	3e-06	0.003657	0.031859	0.552141	0.758042
OG0000367	314	5	8	6	11	6	2	6	0.0085	0.705064	0.260771	0.886444	0.006687	0.63376	0.014052
OG0000370	316	6	5	6	14	6	1	6	0.0001	0.901359	0.705064	0.886444	0.000198	0.63376	0.001384
OG0000371	317	11	11	8	3	3	1	3	0.003	0.165489	0.165489	0.002262	0.80681	0.575118	0.135793
OG0000372	318	17	4	6	4	4	1	4	0.0002	6.8e-05	0.381928	0.127026	0.837624	0.596275	0.022669
OG0000374	319	5	0	4	3	6	18	7	0	0.432973	0.007062	0.322991	0.054399	0.230948	7e-06
OG0000375	320	21	2	5	2	2	1	2	0	0	0.138796	0.013822	0.756447	0.552141	0.392646
OG0000376	321	0	2	2	2	5	22	6	0	0.134709	0.815016	0.055527	0.037118	0.204518	0
OG0000377	322	6	12	7	2	5	6	5	0.024	0.727663	0.033263	0.167766	0.037118	0.615774	0.386027
OG0000378	323	17	2	6	4	4	3	4	0.0004	6.8e-05	0.040967	0.127026	0.837624	0.596275	0.552181
OG0000379	324	1	23	4	1	2	1	2	0	0.056386	0	0.097051	0.390103	0.552141	0.392646
OG0000381	326	1	6	4	1	6	18	7	0	0.056386	0.167843	0.322991	0.001319	0.230948	7e-06
OG0000382	327	5	3	5	3	7	15	7	0.0011	0.891221	0.336445	0.360937	0.020732	0.650368	0.00049
OG0000383	328	2	4	4	2	6	18	7	0	0.281229	0.87697	0.322991	0.013609	0.230948	7e-06
OG0000385	330	1	15	6	3	5	7	5	0.0001	0.006973	0.000823	0.430345	0.234077	0.615774	0.135168
OG0000387	332	2	1	2	1	5	22	6	0	0.815016	0.487153	0.055527	0.003887	0.204518	0
OG0000388	333	3	1	3	1	5	21	6	0	0.854833	0.214105	0.278736	0.003887	0.204518	0
OG0000391	336	2	10	6	2	6	12	6	0.0002	0.040967	0.067128	0.886444	0.013609	0.63376	0.002846
OG0000392	337	12	10	8	2	3	2	3	0.0054	0.074999	0.333067	0.002262	0.484917	0.575118	0.487472
OG0000393	338	1	23	4	1	2	1	2	0	0.056386	0	0.097051	0.390103	0.552141	0.392646
OG0000394	339	0	25	3	0	1	1	1	0	0.02969	0	0.022514	0.242993	0.527168	0.669144
OG0000396	340	8	17	8	0	2	1	2	0	0.915186	0.001613	0.000234	0.031859	0.552141	0.392646
OG0000397	341	1	21	5	0	3	4	3	0	0.026372	0	0.086298	0.010444	0.575118	0.26442
OG0000398	342	0	24	4	0	2	2	2	0	0.007062	0	0.097051	0.031859	0.552141	0.758042
OG0000399	343	1	24	4	0	1	1	1	0	0.056386	0	0.004895	0.242993	0.527168	0.669144
OG0000400	344	11	12	8	0	3	3	3	0.0003	0.165489	0.074999	0.002262	0.010444	0.575118	0.808218
OG0000403	347	14	3	6	3	5	5	5	0.0075	0.001607	0.175123	0.430345	0.234077	0.615774	0.858953
OG0000404	348	12	7	7	3	4	3	4	0.0476	0.033263	0.909064	0.06495	0.549766	0.596275	0.552181
OG0000405	349	11	1	6	7	6	6	6	0.0174	0.022646	0.006973	0.886444	0.427949	0.63376	0.873147
OG0000406	350	9	2	5	12	6	2	6	0.0002	0.045377	0.138796	0.666356	0.002726	0.63376	0.014052
OG0000409	353	11	8	7	4	4	2	4	0.0413	0.090309	0.563182	0.06495	0.837624	0.596275	0.188824
OG0000413	357	18	0	5	3	4	4	4	0	4e-06	0.001737	0.374707	0.549766	0.596275	0.838816
OG0000414	358	6	3	5	14	6	2	6	0.0004	0.48783	0.336445	0.666356	0.000198	0.63376	0.014052
OG0000415	359	14	3	6	2	5	6	5	0.0017	0.001607	0.175123	0.430345	0.037118	0.615774	0.386027
OG0000417	361	0	19	5	2	4	4	4	0	0.001737	1e-06	0.374707	0.186566	0.596275	0.838816
OG0000419	363	3	1	4	6	8	15	8	0.0028	0.636103	0.056386	0.046017	0.3457	0.665716	0.001962
OG0000420	364	7	13	7	3	3	2	3	0.0132	0.909064	0.020293	0.007735	0.80681	0.575118	0.487472
OG0000422	366	5	9	6	2	6	9	6	0.0235	0.705064	0.111187	0.886444	0.013609	0.63376	0.097874
OG0000424	368	0	1	1	1	4	23	6	0	0.325493	0.728538	0.034404	0.022067	0.005825	0
OG0000426	369	9	2	5	11	6	3	6	0.0036	0.045377	0.138796	0.666356	0.006687	0.63376	0.055635
OG0000429	372	1	2	2	1	5	21	6	0	0.487153	0.815016	0.055527	0.003887	0.204518	0
OG0000430	373	2	21	5	1	2	1	2	0	0.138796	0	0.013822	0.390103	0.552141	0.392646
OG0000431	374	1	21	4	1	2	2	2	0	0.056386	0	0.097051	0.390103	0.552141	0.758042
OG0000433	376	16	0	5	1	5	8	5	0	3.4e-05	0.001737	0.874213	0.003887	0.615774	0.071069
OG0000436	379	10	5	6	1	5	9	5	0.0023	0.067128	0.705064	0.430345	0.003887	0.615774	0.016885
OG0000437	380	8	12	7	4	4	1	4	0.0058	0.563182	0.033263	0.06495	0.837624	0.596275	0.022669
OG0000439	381	0	3	3	0	5	22	6	0	0.02969	0.854833	0.278736	0.000239	0.204518	0
OG0000440	382	2	17	6	0	4	6	4	0	0.040967	6.8e-05	0.127026	0.00154	0.596275	0.100856
OG0000441	383	1	22	4	0	2	2	2	0	0.056386	0	0.097051	0.031859	0.552141	0.758042
OG0000447	386	1	5	4	2	6	16	7	0	0.056386	0.432973	0.322991	0.013609	0.230948	9.3e-05
OG0000448	387	3	4	4	4	6	13	6	0.0231	0.636103	0.87697	0.322991	0.276132	0.63376	0.000619
OG0000452	390	9	0	5	8	7	7	7	0.0071	0.045377	0.001737	0.360937	0.464934	0.650368	0.883742
OG0000453	391	3	0	3	2	6	19	7	0	0.854833	0.02969	0.129337	0.013609	0.230948	2e-06
OG0000456	393	11	7	7	5	4	1	4	0.0114	0.090309	0.909064	0.06495	0.328816	0.596275	0.022669
OG0000458	395	3	15	6	3	4	3	4	0.0017	0.175123	0.000823	0.127026	0.549766	0.596275	0.552181
OG0000462	399	13	5	6	3	4	3	4	0.0249	0.003543	0.705064	0.127026	0.549766	0.596275	0.552181
OG0000463	400	5	16	6	1	2	2	2	0.0003	0.705064	0.000184	0.003657	0.390103	0.552141	0.758042
OG0000464	401	1	1	2	1	5	21	6	0	0.487153	0.487153	0.055527	0.003887	0.204518	0
OG0000465	402	1	4	3	1	5	18	6	0	0.214105	0.358884	0.278736	0.003887	0.204518	1e-06
OG0000466	403	1	3	3	3	6	17	7	0.0001	0.214105	0.854833	0.129337	0.054399	0.230948	3.2e-05
OG0000467	404	16	5	6	2	2	1	2	0.0003	0.000184	0.705064	0.003657	0.756447	0.552141	0.392646
OG0000469	406	1	22	4	0	1	1	1	0	0.056386	0	0.004895	0.242993	0.527168	0.669144
OG0000470	407	1	21	4	0	2	2	2	0	0.056386	0	0.097051	0.031859	0.552141	0.758042
OG0000471	408	0	21	4	0	3	3	3	0	0.007062	0	0.303546	0.010444	0.575118	0.808218
OG0000472	409	1	2	2	0	4	21	5	0	0.487153	0.815016	0.227064	0.00154	0.176206	0
OG0000474	410	14	2	5	4	4	3	4	0.0023	0.000274	0.138796	0.374707	0.837624	0.596275	0.552181
OG0000476	412	6	5	6	10	6	2	6	0.0204	0.901359	0.705064	0.886444	0.025996	0.63376	0.014052
OG0000477	413	7	4	5	11	5	1	5	0.0009	0.216905	0.675825	0.874213	0.001327	0.615774	0.004041
OG0000478	414	3	13	5	5	4	2	4	0.0046	0.336445	0.000755	0.374707	0.328816	0.596275	0.188824
OG0000480	416	6	14	6	2	2	1	2	0.0011	0.901359	0.001607	0.003657	0.756447	0.552141	0.392646
OG0000481	417	3	14	6	5	4	1	4	0.0007	0.175123	0.001607	0.127026	0.328816	0.596275	0.022669
OG0000482	418	16	2	5	3	3	2	3	0.0003	3.4e-05	0.138796	0.086298	0.80681	0.575118	0.487472
OG0000483	419	0	1	2	7	8	15	8	0.0005	0.134709	0.487153	0.002246	0.681846	0.665716	0.001962
OG0000484	420	1	4	3	1	5	17	6	0	0.214105	0.358884	0.278736	0.003887	0.204518	3e-06
OG0000485	421	9	2	5	3	5	9	5	0.0149	0.045377	0.138796	0.874213	0.234077	0.615774	0.016885
OG0000486	422	5	2	4	12	6	4	6	0.0187	0.432973	0.281229	0.322991	0.002726	0.63376	0.278818
OG0000487	423	12	2	5	8	5	1	5	0.0002	0.003284	0.138796	0.874213	0.069621	0.615774	0.004041
OG0000489	425	0	0	1	4	6	19	7	0	0.325493	0.325493	0.002902	0.276132	0.230948	2e-06
OG0000492	428	12	2	5	2	5	7	5	0.0016	0.003284	0.138796	0.874213	0.037118	0.615774	0.135168
OG0000493	429	17	3	5	2	2	1	2	0	1.2e-05	0.336445	0.013822	0.756447	0.552141	0.392646
OG0000494	430	11	2	5	8	5	2	5	0.0016	0.006505	0.138796	0.874213	0.069621	0.615774	0.038039
OG0000499	434	5	5	5	11	6	2	6	0.0111	0.891221	0.891221	0.666356	0.006687	0.63376	0.014052
OG0000500	435	1	18	4	2	2	2	2	0	0.056386	0	0.097051	0.756447	0.552141	0.758042
OG0000501	436	1	1	2	5	6	16	7	0.0004	0.487153	0.487153	0.02302	0.631839	0.230948	9.3e-05
OG0000503	438	12	3	6	6	5	2	5	0.0074	0.01225	0.175123	0.430345	0.383299	0.615774	0.038039
OG0000507	442	14	1	5	4	4	4	4	0.0014	0.000274	0.026372	0.374707	0.837624	0.596275	0.838816
OG0000509	444	0	16	5	3	4	4	4	0	0.001737	3.4e-05	0.374707	0.549766	0.596275	0.838816
OG0000513	447	1	2	2	2	5	18	6	0	0.487153	0.815016	0.055527	0.037118	0.204518	1e-06
OG0000516	449	14	4	6	0	4	5	4	0.0002	0.001607	0.381928	0.127026	0.00154	0.596275	0.331434
OG0000518	450	2	13	6	0	5	8	5	0	0.040967	0.003543	0.430345	0.000239	0.615774	0.071069
OG0000519	451	1	0	1	0	3	22	5	0	0.728538	0.325493	0.167417	0.010444	0.003991	0
OG0000520	452	3	0	3	16	6	3	6	0	0.854833	0.02969	0.129337	1.2e-05	0.63376	0.055635
OG0000522	453	6	3	5	10	6	3	6	0.045	0.48783	0.336445	0.666356	0.025996	0.63376	0.055635
OG0000523	454	3	2	3	1	5	16	6	0	0.854833	0.578464	0.278736	0.003887	0.204518	1.3e-05
OG0000525	456	2	1	2	17	5	2	5	0	0.815016	0.487153	0.055527	0	0.615774	0.038039
OG0000526	457	7	1	4	13	5	1	5	0	0.098543	0.056386	0.633774	8.3e-05	0.615774	0.004041
OG0000527	458	4	0	3	15	6	3	6	0	0.358884	0.02969	0.129337	8.4e-05	0.63376	0.055635
OG0000528	459	0	19	3	2	2	1	2	0	0.02969	0	0.212854	0.756447	0.552141	0.392646
OG0000529	460	1	18	4	2	2	1	2	0	0.056386	0	0.097051	0.756447	0.552141	0.392646
OG0000530	461	1	1	2	19	5	1	5	0	0.487153	0.487153	0.055527	0	0.615774	0.004041
OG0000531	462	9	6	6	6	5	1	5	0.0223	0.111187	0.901359	0.430345	0.383299	0.615774	0.004041
OG0000535	465	2	13	5	4	4	3	4	0.0053	0.138796	0.000755	0.374707	0.837624	0.596275	0.552181
OG0000537	466	3	11	6	2	5	6	5	0.0165	0.175123	0.022646	0.430345	0.037118	0.615774	0.386027
OG0000539	468	4	13	6	4	4	1	4	0.0021	0.381928	0.003543	0.127026	0.837624	0.596275	0.022669
OG0000541	470	3	6	5	11	6	2	6	0.0057	0.336445	0.48783	0.666356	0.006687	0.63376	0.014052
OG0000542	471	11	6	6	3	3	2	3	0.0391	0.022646	0.901359	0.035409	0.80681	0.575118	0.487472
OG0000543	472	3	12	5	1	4	6	4	0.0015	0.336445	0.003284	0.374707	0.022067	0.596275	0.100856
OG0000544	473	1	5	4	2	5	14	6	0.0001	0.056386	0.432973	0.633774	0.037118	0.204518	0.00021
OG0000546	475	1	2	2	1	4	18	5	0	0.487153	0.815016	0.227064	0.022067	0.176206	0
OG0000548	477	1	1	2	2	5	18	6	0	0.487153	0.487153	0.055527	0.037118	0.204518	1e-06
OG0000549	478	6	0	4	1	5	15	6	0	0.167843	0.007062	0.633774	0.003887	0.204518	8.9e-05
OG0000552	481	1	19	4	0	2	2	2	0	0.056386	0	0.097051	0.031859	0.552141	0.758042
OG0000554	482	1	1	2	0	4	20	5	0	0.487153	0.487153	0.227064	0.00154	0.176206	0
OG0000555	483	2	18	4	0	2	2	2	0	0.281229	0	0.097051	0.031859	0.552141	0.758042
OG0000557	484	0	1	1	0	3	21	5	0	0.325493	0.728538	0.167417	0.010444	0.003991	0
OG0000558	485	10	5	6	0	5	7	5	0.0008	0.067128	0.705064	0.430345	0.000239	0.615774	0.135168
OG0000561	487	13	3	5	4	3	1	3	0.0011	0.000755	0.336445	0.086298	0.262103	0.575118	0.135793
OG0000563	489	9	5	6	6	5	1	5	0.0207	0.111187	0.705064	0.430345	0.383299	0.615774	0.004041
OG0000567	492	1	0	1	19	4	1	4	0	0.728538	0.325493	0.034404	0	0.596275	0.022669
OG0000568	493	0	0	0	1	3	20	5	0	0.5	0.5	0.017082	0.133962	0.003991	0
OG0000571	496	5	13	5	2	2	1	2	0.0023	0.891221	0.000755	0.013822	0.756447	0.552141	0.392646
OG0000572	497	2	15	5	3	3	1	3	0.0002	0.138796	9.7e-05	0.086298	0.80681	0.575118	0.135793
OG0000573	498	5	5	5	10	5	1	5	0.004	0.891221	0.891221	0.874213	0.007896	0.615774	0.004041
OG0000574	499	2	10	5	1	5	8	5	0.0008	0.138796	0.014335	0.874213	0.003887	0.615774	0.071069
OG0000575	500	8	2	5	9	5	2	5	0.0048	0.084046	0.138796	0.874213	0.016401	0.615774	0.038039
OG0000576	501	16	2	4	2	2	1	2	0.0001	5e-06	0.281229	0.097051	0.756447	0.552141	0.392646
OG0000578	503	7	12	6	1	2	1	2	0.0013	0.529869	0.01225	0.003657	0.390103	0.552141	0.392646
OG0000581	506	1	12	4	5	4	3	4	0.0038	0.056386	0.000396	0.856826	0.328816	0.596275	0.552181
OG0000582	507	6	7	6	7	5	1	5	0.0267	0.901359	0.529869	0.430345	0.133299	0.615774	0.004041
OG0000583	508	7	6	6	1	5	7	5	0.0261	0.529869	0.901359	0.430345	0.003887	0.615774	0.135168
OG0000584	509	16	1	4	3	3	1	3	0	5e-06	0.056386	0.303546	0.80681	0.575118	0.135793
OG0000587	512	6	0	4	1	5	14	6	0	0.167843	0.007062	0.633774	0.003887	0.204518	0.00021
OG0000591	516	9	8	6	2	3	2	3	0.04055	0.111187	0.260771	0.035409	0.484917	0.575118	0.487472
OG0000593	518	0	17	4	3	3	1	3	0	0.007062	2e-06	0.303546	0.80681	0.575118	0.135793
OG0000594	519	9	1	5	1	5	10	5	0.0001	0.045377	0.026372	0.874213	0.003887	0.615774	0.008181
OG0000595	520	14	2	5	4	3	1	3	0.0003	0.000274	0.138796	0.086298	0.262103	0.575118	0.135793
OG0000596	521	5	13	5	2	2	1	2	0.0023	0.891221	0.000755	0.013822	0.756447	0.552141	0.392646
OG0000599	524	13	4	5	3	3	1	3	0.0028	0.000755	0.675825	0.086298	0.80681	0.575118	0.135793
OG0000601	525	7	8	6	5	4	1	4	0.0359	0.529869	0.260771	0.127026	0.328816	0.596275	0.022669
OG0000604	528	3	2	3	1	5	15	6	0	0.854833	0.578464	0.278736	0.003887	0.204518	8.9e-05
OG0000608	531	15	3	5	1	2	2	2	0.0003	9.7e-05	0.336445	0.013822	0.390103	0.552141	0.758042
OG0000609	532	9	8	6	1	3	3	3	0.0207	0.111187	0.260771	0.035409	0.133962	0.575118	0.808218
OG0000610	533	11	6	6	2	3	2	3	0.0212	0.022646	0.901359	0.035409	0.484917	0.575118	0.487472
OG0000611	534	9	8	6	3	3	1	3	0.0207	0.111187	0.260771	0.035409	0.80681	0.575118	0.135793
OG0000614	537	7	10	6	1	3	3	3	0.0171	0.529869	0.067128	0.035409	0.133962	0.575118	0.808218
OG0000615	538	2	2	3	1	5	16	6	0	0.578464	0.578464	0.278736	0.003887	0.204518	1.3e-05
OG0000616	539	1	19	3	0	1	1	1	0	0.214105	0	0.022514	0.242993	0.527168	0.669144
OG0000618	540	1	3	3	0	4	17	5	0	0.214105	0.854833	0.59004	0.00154	0.176206	0
OG0000619	541	2	18	4	0	1	1	1	0	0.281229	0	0.004895	0.242993	0.527168	0.669144
OG0000623	542	1	19	3	0	1	1	1	0	0.214105	0	0.022514	0.242993	0.527168	0.669144
OG0000626	544	1	8	4	10	5	1	5	0.0001	0.056386	0.026925	0.633774	0.007896	0.615774	0.004041
OG0000628	546	3	4	4	2	5	11	5	0.0123	0.636103	0.87697	0.633774	0.037118	0.615774	0.001389
OG0000629	547	7	7	6	5	4	1	4	0.0465	0.529869	0.529869	0.127026	0.328816	0.596275	0.022669
OG0000630	548	11	3	5	4	4	2	4	0.0257	0.006505	0.336445	0.374707	0.837624	0.596275	0.188824
OG0000632	549	3	5	4	11	5	1	5	0.0014	0.636103	0.432973	0.633774	0.001327	0.615774	0.004041
OG0000635	551	9	1	5	8	5	2	5	0.0019	0.045377	0.026372	0.874213	0.069621	0.615774	0.038039
OG0000636	552	1	17	3	1	1	1	1	0	0.214105	0	0.022514	0.667684	0.527168	0.669144
OG0000637	553	10	0	4	9	4	1	4	0	0.003173	0.007062	0.856826	0.003422	0.596275	0.022669
OG0000638	554	12	2	5	5	4	1	4	0.0009	0.003284	0.138796	0.374707	0.328816	0.596275	0.022669
OG0000639	555	1	12	4	3	4	4	4	0.0035	0.056386	0.000396	0.856826	0.549766	0.596275	0.838816
OG0000640	556	11	3	5	5	4	1	4	0.004	0.006505	0.336445	0.374707	0.328816	0.596275	0.022669
OG0000641	557	7	5	5	7	4	1	4	0.0275	0.216905	0.891221	0.374707	0.044709	0.596275	0.022669
OG0000643	558	7	6	5	6	4	1	4	0.0405	0.216905	0.48783	0.374707	0.099376	0.596275	0.022669
OG0000644	559	0	3	3	2	5	15	6	0	0.02969	0.854833	0.278736	0.037118	0.204518	8.9e-05
OG0000645	560	1	15	3	2	2	2	2	0.0002	0.214105	2e-06	0.212854	0.756447	0.552141	0.758042
OG0000646	561	1	15	4	3	3	1	3	0	0.056386	1.5e-05	0.303546	0.80681	0.575118	0.135793
OG0000647	562	12	4	5	2	3	2	3	0.0109	0.003284	0.675825	0.086298	0.484917	0.575118	0.487472
OG0000650	565	0	16	4	1	3	3	3	0	0.007062	5e-06	0.303546	0.133962	0.575118	0.808218
OG0000651	566	2	2	3	4	6	12	6	0.0271	0.578464	0.578464	0.129337	0.276132	0.63376	0.002846
OG0000652	567	1	4	3	3	5	12	5	0.005	0.214105	0.358884	0.278736	0.234077	0.615774	0.000553
OG0000653	568	1	17	3	1	1	1	1	0	0.214105	0	0.022514	0.667684	0.527168	0.669144
OG0000654	569	6	2	4	11	5	1	5	0.0007	0.167843	0.281229	0.633774	0.001327	0.615774	0.004041
OG0000655	570	8	6	6	5	4	1	4	0.04	0.260771	0.901359	0.127026	0.328816	0.596275	0.022669
OG0000657	571	4	11	5	4	3	1	3	0.0098	0.675825	0.006505	0.086298	0.262103	0.575118	0.135793
OG0000659	573	5	1	4	12	5	2	5	0.0007	0.432973	0.056386	0.633774	0.000525	0.615774	0.038039
OG0000660	574	1	14	4	1	3	4	3	0.0002	0.056386	4.5e-05	0.303546	0.133962	0.575118	0.26442
OG0000661	575	2	12	5	4	4	2	4	0.005	0.138796	0.003284	0.374707	0.837624	0.596275	0.188824
OG0000662	576	1	16	4	2	2	1	2	0	0.056386	5e-06	0.097051	0.756447	0.552141	0.392646
OG0000663	577	12	4	5	2	3	2	3	0.0109	0.003284	0.675825	0.086298	0.484917	0.575118	0.487472
OG0000664	578	8	3	5	8	5	1	5	0.0045	0.084046	0.336445	0.874213	0.069621	0.615774	0.004041
OG0000665	579	4	12	5	2	3	2	3	0.0109	0.675825	0.003284	0.086298	0.484917	0.575118	0.487472
OG0000668	582	2	12	5	5	4	1	4	0.0009	0.138796	0.003284	0.374707	0.328816	0.596275	0.022669
OG0000670	583	3	13	5	3	3	1	3	0.0021	0.336445	0.000755	0.086298	0.80681	0.575118	0.135793
OG0000671	584	4	4	4	11	5	1	5	0.0015	0.87697	0.87697	0.633774	0.001327	0.615774	0.004041
OG0000672	585	4	12	5	2	3	2	3	0.0109	0.675825	0.003284	0.086298	0.484917	0.575118	0.487472
OG0000673	586	6	3	5	2	5	9	5	0.0319	0.48783	0.336445	0.874213	0.037118	0.615774	0.016885
OG0000674	587	0	2	2	1	4	17	5	0	0.134709	0.815016	0.227064	0.022067	0.176206	0
OG0000676	588	1	7	4	2	5	10	5	0.0015	0.056386	0.098543	0.633774	0.037118	0.615774	0.008181
OG0000678	590	2	1	2	2	4	15	5	0.0001	0.815016	0.487153	0.227064	0.186566	0.176206	6e-06
OG0000679	591	6	8	6	5	4	1	4	0.04	0.901359	0.260771	0.127026	0.328816	0.596275	0.022669
OG0000681	593	2	5	4	1	5	12	5	0.0004	0.281229	0.432973	0.633774	0.003887	0.615774	0.000553
OG0000682	594	11	4	5	2	3	3	3	0.032	0.006505	0.675825	0.086298	0.484917	0.575118	0.808218
OG0000684	596	1	15	4	1	3	3	3	0	0.056386	1.5e-05	0.303546	0.133962	0.575118	0.808218
OG0000685	597	15	1	4	3	3	1	3	0	1.5e-05	0.056386	0.303546	0.80681	0.575118	0.135793
OG0000687	599	7	9	6	3	3	1	3	0.0258	0.529869	0.111187	0.035409	0.80681	0.575118	0.135793
OG0000689	601	2	15	4	2	2	1	2	0.0002	0.281229	1.5e-05	0.097051	0.756447	0.552141	0.392646
OG0000690	602	1	1	2	2	5	16	6	0	0.487153	0.487153	0.055527	0.037118	0.204518	1.3e-05
OG0000691	603	10	5	6	4	4	1	4	0.0229	0.067128	0.705064	0.127026	0.837624	0.596275	0.022669
OG0000692	604	7	1	4	2	5	10	5	0.0015	0.098543	0.056386	0.633774	0.037118	0.615774	0.008181
OG0000695	607	6	2	4	2	5	10	5	0.0091	0.167843	0.281229	0.633774	0.037118	0.615774	0.008181
OG0000696	608	13	4	5	1	2	2	2	0.0021	0.000755	0.675825	0.013822	0.390103	0.552141	0.758042
OG0000698	610	1	4	3	1	4	14	5	0	0.214105	0.358884	0.59004	0.022067	0.176206	2.3e-05
OG0000699	611	2	7	4	0	4	11	4	0	0.281229	0.098543	0.856826	0.00154	0.596275	0.000164
OG0000700	612	15	4	5	0	1	1	1	0	9.7e-05	0.675825	0.001064	0.242993	0.527168	0.669144
OG0000701	613	2	16	4	0	2	2	2	0	0.281229	5e-06	0.097051	0.031859	0.552141	0.758042
OG0000703	614	19	0	3	0	1	1	1	0	0	0.02969	0.022514	0.242993	0.527168	0.669144
OG0000704	615	2	0	2	0	4	18	5	0	0.815016	0.134709	0.227064	0.00154	0.176206	0
OG0000705	616	1	6	4	3	5	9	5	0.0188	0.056386	0.167843	0.633774	0.234077	0.615774	0.016885
OG0000706	617	7	2	4	9	4	1	4	0.0016	0.098543	0.281229	0.856826	0.003422	0.596275	0.022669
OG0000708	619	1	4	3	13	4	1	4	0	0.214105	0.358884	0.59004	9e-06	0.596275	0.022669
OG0000712	623	17	0	2	1	1	1	1	0	0	0.134709	0.103562	0.667684	0.527168	0.669144
OG0000714	625	3	2	3	3	5	11	5	0.029	0.854833	0.578464	0.278736	0.234077	0.615774	0.001389
OG0000719	629	0	16	3	1	2	2	2	0	0.02969	0	0.212854	0.390103	0.552141	0.758042
OG0000720	630	0	17	2	1	1	1	1	0	0.134709	0	0.103562	0.667684	0.527168	0.669144
OG0000723	632	0	15	3	2	2	2	2	0	0.02969	2e-06	0.212854	0.756447	0.552141	0.758042
OG0000724	633	11	1	4	6	4	1	4	0.0005	0.001136	0.056386	0.856826	0.099376	0.596275	0.022669
OG0000725	634	1	1	2	1	4	16	5	0	0.487153	0.487153	0.227064	0.022067	0.176206	1e-06
OG0000727	636	13	2	4	3	3	1	3	0.0005	0.000135	0.281229	0.303546	0.80681	0.575118	0.135793
OG0000730	639	2	1	2	1	4	15	5	0	0.815016	0.487153	0.227064	0.022067	0.176206	6e-06
OG0000732	640	2	11	5	5	4	1	4	0.0016	0.138796	0.006505	0.374707	0.328816	0.596275	0.022669
OG0000733	641	9	2	4	6	4	2	4	0.024	0.013357	0.281229	0.856826	0.099376	0.596275	0.188824
OG0000734	642	3	10	5	4	4	2	4	0.0476	0.336445	0.014335	0.374707	0.837624	0.596275	0.188824
OG0000737	644	2	12	4	4	3	1	3	0.0011	0.281229	0.000396	0.303546	0.262103	0.575118	0.135793
OG0000741	646	11	2	5	5	4	1	4	0.0016	0.006505	0.138796	0.374707	0.328816	0.596275	0.022669
OG0000742	647	8	5	5	5	4	1	4	0.0429	0.084046	0.891221	0.374707	0.328816	0.596275	0.022669
OG0000743	648	0	0	0	3	4	16	5	0	0.5	0.5	0.003147	0.549766	0.176206	1e-06
OG0000747	652	5	2	4	2	5	10	5	0.012	0.432973	0.281229	0.633774	0.037118	0.615774	0.008181
OG0000748	653	2	2	3	1	4	14	5	0.0001	0.578464	0.578464	0.59004	0.022067	0.176206	2.3e-05
OG0000749	654	1	9	4	3	4	6	4	0.024	0.056386	0.013357	0.856826	0.549766	0.596275	0.100856
OG0000751	656	10	5	5	2	3	2	3	0.0445	0.014335	0.891221	0.086298	0.484917	0.575118	0.487472
OG0000753	658	1	3	3	2	5	13	6	0.0006	0.214105	0.854833	0.278736	0.037118	0.204518	0.000619
OG0000755	660	3	11	5	4	3	1	3	0.0055	0.336445	0.006505	0.086298	0.262103	0.575118	0.135793
OG0000756	661	2	1	2	1	4	15	5	0	0.815016	0.487153	0.227064	0.022067	0.176206	6e-06
OG0000757	662	10	5	5	1	3	3	3	0.02	0.014335	0.891221	0.086298	0.133962	0.575118	0.808218
OG0000758	663	1	2	2	2	4	14	5	0.0002	0.487153	0.815016	0.227064	0.186566	0.176206	2.3e-05
OG0000769	673	2	12	4	4	3	1	3	0.0011	0.281229	0.000396	0.303546	0.262103	0.575118	0.135793
OG0000770	674	10	6	5	1	2	2	2	0.0143	0.014335	0.48783	0.013822	0.390103	0.552141	0.758042
OG0000771	675	1	1	2	1	4	16	5	0	0.487153	0.487153	0.227064	0.022067	0.176206	1e-06
OG0000772	676	15	1	3	1	2	2	2	0.0001	2e-06	0.214105	0.212854	0.390103	0.552141	0.758042
OG0000774	678	1	10	4	5	4	3	4	0.016	0.056386	0.003173	0.856826	0.328816	0.596275	0.552181
OG0000775	679	6	5	5	1	4	7	4	0.0365	0.48783	0.891221	0.374707	0.022067	0.596275	0.045731
OG0000776	680	7	10	6	1	2	1	2	0.0041	0.529869	0.067128	0.003657	0.390103	0.552141	0.392646
OG0000778	682	6	10	6	0	3	3	3	0.003	0.901359	0.067128	0.035409	0.010444	0.575118	0.808218
OG0000779	683	2	10	5	0	4	7	4	0.0002	0.138796	0.014335	0.374707	0.00154	0.596275	0.045731
OG0000782	684	4	13	5	0	2	2	2	0.0004	0.675825	0.000755	0.013822	0.031859	0.552141	0.758042
OG0000788	686	4	3	4	10	5	1	5	0.0039	0.87697	0.636103	0.633774	0.007896	0.615774	0.004041
OG0000790	688	10	3	4	3	3	2	3	0.04675	0.003173	0.636103	0.303546	0.80681	0.575118	0.487472
OG0000791	689	5	1	3	11	4	1	4	0.0004	0.115699	0.214105	0.59004	0.000154	0.596275	0.022669
OG0000795	692	11	2	4	4	3	1	3	0.003	0.001136	0.281229	0.303546	0.262103	0.575118	0.135793
OG0000797	693	8	1	4	6	4	3	4	0.0385	0.026925	0.056386	0.856826	0.099376	0.596275	0.552181
OG0000803	698	2	2	3	3	5	11	5	0.0224	0.578464	0.578464	0.278736	0.234077	0.615774	0.001389
OG0000808	702	0	14	4	3	3	1	3	0	0.007062	4.5e-05	0.303546	0.80681	0.575118	0.135793
OG0000811	704	10	3	4	3	3	2	3	0.04675	0.003173	0.636103	0.303546	0.80681	0.575118	0.487472
OG0000812	705	12	2	4	3	3	1	3	0.0022	0.000396	0.281229	0.303546	0.80681	0.575118	0.135793
OG0000814	707	1	1	2	11	6	5	6	0.0198	0.487153	0.487153	0.02302	0.006687	0.63376	0.63393
OG0000815	708	1	10	4	6	4	1	4	0.0008	0.056386	0.003173	0.856826	0.099376	0.596275	0.022669
OG0000816	709	0	5	3	11	5	2	5	0.0004	0.02969	0.115699	0.278736	0.001327	0.615774	0.038039
OG0000817	710	0	9	4	6	4	3	4	0.0033	0.007062	0.013357	0.856826	0.099376	0.596275	0.552181
OG0000819	712	1	14	3	2	2	1	2	0.0002	0.214105	5e-06	0.212854	0.756447	0.552141	0.392646
OG0000821	714	3	3	3	1	4	11	4	0.0017	0.854833	0.854833	0.59004	0.022067	0.596275	0.000164
OG0000823	716	1	13	3	2	2	2	2	0.0004	0.214105	1.7e-05	0.212854	0.756447	0.552141	0.758042
OG0000824	717	3	5	4	9	4	1	4	0.007	0.636103	0.432973	0.856826	0.003422	0.596275	0.022669
OG0000825	718	8	0	4	9	4	1	4	0	0.026925	0.007062	0.856826	0.003422	0.596275	0.022669
OG0000826	719	8	4	5	1	4	5	4	0.0385	0.084046	0.675825	0.374707	0.022067	0.596275	0.331434
OG0000827	720	1	9	4	4	4	4	4	0.0467	0.056386	0.013357	0.856826	0.837624	0.596275	0.838816
OG0000832	724	2	0	2	1	4	15	5	0	0.815016	0.134709	0.227064	0.022067	0.176206	6e-06
OG0000836	728	10	4	5	2	3	2	3	0.0408	0.014335	0.675825	0.086298	0.484917	0.575118	0.487472
OG0000837	729	0	8	4	3	5	7	5	0.0041	0.007062	0.026925	0.633774	0.234077	0.615774	0.135168
OG0000838	730	1	1	2	1	4	15	5	0	0.487153	0.487153	0.227064	0.022067	0.176206	6e-06
OG0000839	731	2	2	3	3	5	11	5	0.0224	0.578464	0.578464	0.278736	0.234077	0.615774	0.001389
OG0000840	732	12	4	5	1	2	1	2	0.002	0.003284	0.675825	0.013822	0.390103	0.552141	0.392646
OG0000841	733	2	1	2	1	4	14	5	0	0.815016	0.487153	0.227064	0.022067	0.176206	2.3e-05
OG0000844	736	3	8	5	6	4	1	4	0.0186	0.336445	0.084046	0.374707	0.099376	0.596275	0.022669
OG0000845	737	3	3	4	2	5	10	5	0.0241	0.636103	0.636103	0.633774	0.037118	0.615774	0.008181
OG0000849	741	12	2	4	3	3	1	3	0.0022	0.000396	0.281229	0.303546	0.80681	0.575118	0.135793
OG0000850	742	7	1	4	3	5	7	5	0.0441	0.098543	0.056386	0.633774	0.234077	0.615774	0.135168
OG0000860	751	0	15	3	1	2	2	2	0	0.02969	2e-06	0.212854	0.390103	0.552141	0.758042
OG0000862	753	1	15	3	1	1	1	1	0	0.214105	2e-06	0.022514	0.667684	0.527168	0.669144
OG0000863	754	2	9	4	2	4	5	4	0.0351	0.281229	0.013357	0.856826	0.186566	0.596275	0.331434
OG0000865	756	3	6	4	1	4	8	4	0.0153	0.636103	0.167843	0.856826	0.022067	0.596275	0.009488
OG0000866	757	12	4	5	1	2	1	2	0.002	0.003284	0.675825	0.013822	0.390103	0.552141	0.392646
OG0000868	759	6	10	5	1	2	1	2	0.0052	0.48783	0.014335	0.013822	0.390103	0.552141	0.392646
OG0000869	760	8	2	4	2	4	6	4	0.0464	0.026925	0.281229	0.856826	0.186566	0.596275	0.100856
OG0000870	761	11	0	4	5	4	2	4	0.0005	0.001136	0.007062	0.856826	0.328816	0.596275	0.188824
OG0000871	762	2	1	2	1	4	14	5	0	0.815016	0.487153	0.227064	0.022067	0.176206	2.3e-05
OG0000873	763	0	1	1	0	3	17	4	0	0.325493	0.728538	0.167417	0.010444	0.145845	0
OG0000875	764	1	2	2	0	3	15	4	0	0.487153	0.815016	0.528018	0.010444	0.145845	1e-06
OG0000877	765	3	14	4	0	1	1	1	0.0002	0.636103	4.5e-05	0.004895	0.242993	0.527168	0.669144
OG0000878	766	5	1	3	9	4	2	4	0.0079	0.115699	0.214105	0.59004	0.003422	0.596275	0.188824
OG0000879	767	9	3	4	4	3	1	3	0.0248	0.013357	0.636103	0.303546	0.262103	0.575118	0.135793
OG0000880	768	1	9	4	6	4	1	4	0.0015	0.056386	0.013357	0.856826	0.099376	0.596275	0.022669
OG0000881	769	10	4	4	2	2	1	2	0.0146	0.003173	0.87697	0.097051	0.756447	0.552141	0.392646
OG0000882	770	10	5	5	1	2	1	2	0.0068	0.014335	0.891221	0.013822	0.390103	0.552141	0.392646
OG0000883	771	1	1	2	14	4	1	4	0	0.487153	0.487153	0.227064	2e-06	0.596275	0.022669
OG0000888	776	4	11	5	1	2	1	2	0.003	0.675825	0.006505	0.013822	0.390103	0.552141	0.392646
OG0000889	777	8	0	4	6	4	3	4	0.0062	0.026925	0.007062	0.856826	0.099376	0.596275	0.552181
OG0000893	781	2	10	4	4	3	1	3	0.0062	0.281229	0.003173	0.303546	0.262103	0.575118	0.135793
OG0000894	782	11	3	4	2	2	1	2	0.0055	0.001136	0.636103	0.097051	0.756447	0.552141	0.392646
OG0000896	784	0	1	1	2	4	14	5	0	0.325493	0.728538	0.034404	0.186566	0.176206	2.3e-05
OG0000897	785	3	8	5	5	4	1	4	0.0308	0.336445	0.084046	0.374707	0.328816	0.596275	0.022669
OG0000900	788	1	11	4	3	3	2	3	0.0049	0.056386	0.001136	0.303546	0.80681	0.575118	0.487472
OG0000901	789	12	0	3	1	3	4	3	0.0001	5.5e-05	0.02969	0.82989	0.133962	0.575118	0.26442
OG0000903	791	4	4	4	8	4	1	4	0.0236	0.87697	0.87697	0.856826	0.009203	0.596275	0.022669
OG0000907	793	1	8	4	2	4	6	4	0.0177	0.056386	0.026925	0.856826	0.186566	0.596275	0.100856
OG0000908	794	0	3	3	3	5	11	5	0.0029	0.02969	0.854833	0.278736	0.234077	0.615774	0.001389
OG0000910	796	2	2	3	3	5	10	5	0.0492	0.578464	0.578464	0.278736	0.234077	0.615774	0.008181
OG0000917	802	1	12	3	2	2	2	2	0.0017	0.214105	5.5e-05	0.212854	0.756447	0.552141	0.758042
OG0000918	803	2	2	3	2	4	11	4	0.0067	0.578464	0.578464	0.59004	0.186566	0.596275	0.000164
OG0000921	806	5	9	5	2	2	1	2	0.0257	0.891221	0.045377	0.013822	0.756447	0.552141	0.392646
OG0000923	808	2	7	4	1	4	7	4	0.0103	0.281229	0.098543	0.856826	0.022067	0.596275	0.045731
OG0000925	810	2	4	3	9	4	2	4	0.0296	0.578464	0.358884	0.59004	0.003422	0.596275	0.188824
OG0000927	812	2	10	4	4	3	1	3	0.0062	0.281229	0.003173	0.303546	0.262103	0.575118	0.135793
OG0000932	816	13	1	3	2	2	1	2	0.0004	1.7e-05	0.214105	0.212854	0.756447	0.552141	0.392646
OG0000933	817	2	2	3	2	4	11	4	0.0067	0.578464	0.578464	0.59004	0.186566	0.596275	0.000164
OG0000934	818	8	1	4	6	4	2	4	0.0137	0.026925	0.056386	0.856826	0.099376	0.596275	0.188824
OG0000937	820	0	11	3	1	3	5	3	0.0002	0.02969	0.000173	0.82989	0.133962	0.575118	0.067782
OG0000938	821	1	13	3	2	2	1	2	0.0004	0.214105	1.7e-05	0.212854	0.756447	0.552141	0.392646
OG0000942	824	1	11	4	2	3	3	3	0.0049	0.056386	0.001136	0.303546	0.484917	0.575118	0.808218
OG0000943	825	5	10	5	1	2	1	2	0.0068	0.891221	0.014335	0.013822	0.390103	0.552141	0.392646
OG0000945	827	3	1	3	3	5	10	5	0.0259	0.854833	0.214105	0.278736	0.234077	0.615774	0.008181
OG0000949	831	2	3	3	1	4	11	4	0.0015	0.578464	0.854833	0.59004	0.022067	0.596275	0.000164
OG0000960	842	1	9	4	3	4	4	4	0.0385	0.056386	0.013357	0.856826	0.549766	0.596275	0.838816
OG0000967	849	15	0	2	1	1	1	1	0	0	0.134709	0.103562	0.667684	0.527168	0.669144
OG0000969	851	1	0	1	1	3	15	4	0	0.728538	0.325493	0.167417	0.133962	0.145845	1e-06
OG0000971	853	10	3	4	1	3	3	3	0.0159	0.003173	0.636103	0.303546	0.133962	0.575118	0.808218
OG0000974	856	1	12	3	2	2	2	2	0.0017	0.214105	5.5e-05	0.212854	0.756447	0.552141	0.758042
OG0000976	857	2	13	4	0	2	2	2	0.0002	0.281229	0.000135	0.097051	0.031859	0.552141	0.758042
OG0000977	858	0	16	2	0	1	1	1	0	0.134709	0	0.103562	0.242993	0.527168	0.669144
OG0000978	859	2	14	3	0	1	1	1	0	0.578464	5e-06	0.022514	0.242993	0.527168	0.669144
OG0000979	860	0	16	2	0	1	1	1	0	0.134709	0	0.103562	0.242993	0.527168	0.669144
OG0000980	861	5	11	5	0	1	1	1	0.0007	0.891221	0.006505	0.001064	0.242993	0.527168	0.669144
OG0000981	862	3	10	4	0	3	4	3	0.0013	0.636103	0.003173	0.303546	0.010444	0.575118	0.26442
OG0000982	863	2	3	3	0	4	12	5	0	0.578464	0.854833	0.59004	0.00154	0.176206	0.000553
OG0000983	864	3	12	4	0	2	2	2	0.0004	0.636103	0.000396	0.097051	0.031859	0.552141	0.758042
OG0000985	865	12	0	3	0	3	5	3	0	5.5e-05	0.02969	0.82989	0.010444	0.575118	0.067782
OG0000986	866	2	0	2	0	3	15	4	0	0.815016	0.134709	0.528018	0.010444	0.145845	1e-06
OG0000989	868	0	2	2	2	4	12	5	0.0007	0.134709	0.815016	0.227064	0.186566	0.176206	0.000553
OG0000990	869	8	3	4	4	3	1	3	0.04125	0.026925	0.636103	0.303546	0.262103	0.575118	0.135793
OG0000991	870	1	8	4	6	4	1	4	0.0024	0.056386	0.026925	0.856826	0.099376	0.596275	0.022669
OG0000993	872	1	1	2	3	4	11	4	0.0097	0.487153	0.487153	0.227064	0.549766	0.596275	0.000164
OG0000996	875	2	2	3	10	4	2	4	0.0125	0.578464	0.578464	0.59004	0.000602	0.596275	0.188824
OG0001002	880	3	6	4	6	4	1	4	0.0449	0.636103	0.167843	0.856826	0.099376	0.596275	0.022669
OG0001012	887	9	0	4	5	4	2	4	0.0016	0.013357	0.007062	0.856826	0.328816	0.596275	0.188824
OG0001013	888	0	13	3	1	2	2	2	0.0002	0.02969	1.7e-05	0.212854	0.390103	0.552141	0.758042
OG0001014	889	8	1	4	6	4	1	4	0.0024	0.026925	0.056386	0.856826	0.099376	0.596275	0.022669
OG0001015	890	1	1	2	2	4	12	5	0.0015	0.487153	0.487153	0.227064	0.186566	0.176206	0.000553
OG0001017	892	2	6	4	7	4	1	4	0.0137	0.281229	0.167843	0.856826	0.044709	0.596275	0.022669
OG0001018	893	2	1	2	11	4	2	4	0.0024	0.815016	0.487153	0.227064	0.000154	0.596275	0.188824
OG0001019	894	3	2	3	1	4	10	4	0.0041	0.854833	0.578464	0.59004	0.022067	0.596275	0.000632
OG0001021	896	11	1	4	3	3	1	3	0.0018	0.001136	0.056386	0.303546	0.80681	0.575118	0.135793
OG0001026	900	5	9	5	1	2	1	2	0.0124	0.891221	0.045377	0.013822	0.390103	0.552141	0.392646
OG0001032	905	5	8	4	1	2	2	2	0.0496	0.432973	0.026925	0.097051	0.390103	0.552141	0.758042
OG0001034	906	13	1	3	1	1	1	1	0.0003	1.7e-05	0.214105	0.022514	0.667684	0.527168	0.669144
OG0001037	909	10	2	3	2	2	2	2	0.0189	0.00054	0.578464	0.212854	0.756447	0.552141	0.758042
OG0001045	915	2	10	3	2	2	2	2	0.0189	0.578464	0.00054	0.212854	0.756447	0.552141	0.758042
OG0001048	918	1	0	1	13	4	2	4	0	0.728538	0.325493	0.034404	9e-06	0.596275	0.188824
OG0001049	919	11	2	3	2	2	1	2	0.0034	0.000173	0.578464	0.212854	0.756447	0.552141	0.392646
OG0001051	921	1	13	3	1	1	1	1	0.0003	0.214105	1.7e-05	0.022514	0.667684	0.527168	0.669144
OG0001053	923	2	7	4	1	4	6	4	0.02	0.281229	0.098543	0.856826	0.022067	0.596275	0.100856
OG0001054	924	3	1	3	2	4	10	4	0.0094	0.854833	0.214105	0.59004	0.186566	0.596275	0.000632
OG0001059	929	9	3	4	3	3	1	3	0.0299	0.013357	0.636103	0.303546	0.80681	0.575118	0.135793
OG0001060	930	1	6	4	1	4	8	4	0.0028	0.056386	0.167843	0.856826	0.022067	0.596275	0.009488
OG0001066	936	3	2	3	1	4	10	4	0.0041	0.854833	0.578464	0.59004	0.022067	0.596275	0.000632
OG0001069	939	2	3	3	2	4	9	4	0.0453	0.578464	0.854833	0.59004	0.186566	0.596275	0.003556
OG0001071	941	1	1	1	1	3	13	4	0.0001	0.728538	0.728538	0.167417	0.133962	0.145845	1e-05
OG0001078	946	2	10	3	2	2	2	2	0.0189	0.578464	0.00054	0.212854	0.756447	0.552141	0.758042
OG0001082	950	1	1	1	1	3	13	4	0.0001	0.728538	0.728538	0.167417	0.133962	0.145845	1e-05
OG0001083	951	9	5	5	1	2	1	2	0.0124	0.045377	0.891221	0.013822	0.390103	0.552141	0.392646
OG0001094	962	5	8	4	1	2	2	2	0.0496	0.432973	0.026925	0.097051	0.390103	0.552141	0.758042
OG0001096	964	2	3	3	1	4	10	4	0.0041	0.578464	0.854833	0.59004	0.022067	0.596275	0.000632
OG0001098	966	3	0	3	4	5	9	5	0.0251	0.854833	0.02969	0.278736	0.596539	0.615774	0.016885
OG0001101	969	2	1	2	1	3	12	4	0.0006	0.815016	0.487153	0.528018	0.133962	0.145845	4.1e-05
OG0001105	972	9	5	5	1	2	1	2	0.0124	0.045377	0.891221	0.013822	0.390103	0.552141	0.392646
OG0001107	973	1	14	3	0	1	1	1	0	0.214105	5e-06	0.022514	0.242993	0.527168	0.669144
OG0001108	974	2	6	4	0	4	8	4	0.0009	0.281229	0.167843	0.856826	0.00154	0.596275	0.009488
OG0001109	975	1	8	4	0	4	7	4	0.0003	0.056386	0.026925	0.856826	0.00154	0.596275	0.045731
OG0001112	976	8	5	5	0	3	3	3	0.0108	0.084046	0.891221	0.086298	0.010444	0.575118	0.808218
OG0001113	977	2	13	3	0	1	1	1	0.0002	0.578464	1.7e-05	0.022514	0.242993	0.527168	0.669144
OG0001115	978	0	1	1	0	3	15	4	0	0.325493	0.728538	0.167417	0.010444	0.145845	1e-06
OG0001116	979	6	8	5	0	2	2	2	0.0066	0.48783	0.084046	0.013822	0.031859	0.552141	0.758042
OG0001117	980	2	0	2	0	3	14	4	0	0.815016	0.134709	0.528018	0.010444	0.145845	2e-06
OG0001121	984	2	2	2	10	3	1	3	0.0022	0.815016	0.815016	0.528018	6.4e-05	0.575118	0.135793
OG0001125	986	7	1	3	1	3	6	3	0.0063	0.01392	0.214105	0.82989	0.133962	0.575118	0.024158
OG0001128	989	10	0	3	3	3	2	3	0.0023	0.00054	0.02969	0.82989	0.80681	0.575118	0.487472
OG0001129	990	9	0	3	5	3	1	3	0.0004	0.001643	0.02969	0.82989	0.066743	0.575118	0.135793
OG0001139	998	12	0	3	2	2	1	2	0.0003	5.5e-05	0.02969	0.212854	0.756447	0.552141	0.392646
OG0001142	1001	11	0	3	3	3	1	3	0.0003	0.000173	0.02969	0.82989	0.80681	0.575118	0.135793
OG0001144	1003	1	1	2	11	4	2	4	0.0019	0.487153	0.487153	0.227064	0.000154	0.596275	0.188824
OG0001152	1009	10	2	3	2	2	1	2	0.0081	0.00054	0.578464	0.212854	0.756447	0.552141	0.392646
OG0001155	1012	1	7	3	5	3	2	3	0.045	0.214105	0.01392	0.82989	0.066743	0.575118	0.487472
OG0001157	1014	3	2	3	9	4	1	4	0.0062	0.854833	0.578464	0.59004	0.003422	0.596275	0.022669
OG0001162	1017	7	2	3	5	3	1	3	0.0312	0.01392	0.578464	0.82989	0.066743	0.575118	0.135793
OG0001166	1019	1	1	2	2	4	11	4	0.004	0.487153	0.487153	0.227064	0.186566	0.596275	0.000164
OG0001168	1020	2	8	4	4	3	1	3	0.0251	0.281229	0.026925	0.303546	0.262103	0.575118	0.135793
OG0001169	1021	4	0	3	1	4	10	4	0.0005	0.358884	0.02969	0.59004	0.022067	0.596275	0.000632
OG0001170	1022	7	1	3	6	3	1	3	0.0054	0.01392	0.214105	0.82989	0.023575	0.575118	0.135793
OG0001176	1027	9	4	4	1	2	1	2	0.0137	0.013357	0.87697	0.097051	0.390103	0.552141	0.392646
OG0001179	1030	2	8	4	4	3	1	3	0.0251	0.281229	0.026925	0.303546	0.262103	0.575118	0.135793
OG0001180	1031	0	1	1	1	3	13	4	0	0.325493	0.728538	0.167417	0.133962	0.145845	1e-05
OG0001186	1037	10	1	4	1	3	3	3	0.0041	0.003173	0.056386	0.303546	0.133962	0.575118	0.808218
OG0001191	1042	9	2	4	3	3	1	3	0.0191	0.013357	0.281229	0.303546	0.80681	0.575118	0.135793
OG0001195	1045	1	11	3	1	2	2	2	0.0017	0.214105	0.000173	0.212854	0.390103	0.552141	0.758042
OG0001198	1048	9	1	3	4	3	1	3	0.0051	0.001643	0.214105	0.82989	0.262103	0.575118	0.135793
OG0001203	1053	6	1	4	6	4	2	4	0.0441	0.167843	0.056386	0.856826	0.099376	0.596275	0.188824
OG0001204	1054	6	2	4	1	4	6	4	0.0322	0.167843	0.281229	0.856826	0.022067	0.596275	0.100856
OG0001209	1058	3	1	3	1	4	10	4	0.0021	0.854833	0.214105	0.59004	0.022067	0.596275	0.000632
OG0001213	1060	3	3	3	1	4	8	4	0.0306	0.854833	0.854833	0.59004	0.022067	0.596275	0.009488
OG0001214	1061	0	11	3	1	3	3	3	0.0003	0.02969	0.000173	0.82989	0.133962	0.575118	0.808218
OG0001222	1069	1	2	2	2	4	10	4	0.0122	0.487153	0.815016	0.227064	0.186566	0.596275	0.000632
OG0001226	1073	1	12	2	1	1	1	1	0.0004	0.487153	5e-06	0.103562	0.667684	0.527168	0.669144
OG0001234	1081	6	7	5	1	2	1	2	0.0292	0.48783	0.216905	0.013822	0.390103	0.552141	0.392646
OG0001244	1091	1	8	3	2	3	4	3	0.0379	0.214105	0.004866	0.82989	0.484917	0.575118	0.26442
OG0001248	1095	1	9	3	1	3	4	3	0.0049	0.214105	0.001643	0.82989	0.133962	0.575118	0.26442
OG0001254	1100	2	1	2	1	3	11	4	0.0013	0.815016	0.487153	0.528018	0.133962	0.145845	0.000164
OG0001260	1101	0	1	1	0	3	14	4	0	0.325493	0.728538	0.167417	0.010444	0.145845	2e-06
OG0001261	1102	1	9	3	0	3	5	3	0.0004	0.214105	0.001643	0.82989	0.010444	0.575118	0.067782
OG0001262	1103	0	4	3	0	4	11	4	0	0.02969	0.358884	0.59004	0.00154	0.596275	0.000164
OG0001264	1104	5	1	3	0	3	9	3	0.0004	0.115699	0.214105	0.82989	0.010444	0.575118	0.00029
OG0001265	1105	3	1	2	0	3	11	4	0	0.256806	0.487153	0.528018	0.010444	0.145845	0.000164
OG0001266	1106	5	7	5	0	3	3	3	0.0173	0.891221	0.216905	0.086298	0.010444	0.575118	0.808218
OG0001275	1112	5	1	3	7	3	1	3	0.0092	0.115699	0.214105	0.82989	0.004566	0.575118	0.135793
OG0001281	1117	10	1	3	2	2	1	2	0.003	0.00054	0.214105	0.212854	0.756447	0.552141	0.392646
OG0001291	1125	3	0	2	8	4	3	4	0.0266	0.256806	0.134709	0.227064	0.009203	0.596275	0.552181
OG0001297	1130	8	3	4	2	2	1	2	0.04765	0.026925	0.636103	0.097051	0.756447	0.552141	0.392646
OG0001298	1131	0	10	3	1	3	3	3	0.0005	0.02969	0.00054	0.82989	0.133962	0.575118	0.808218
OG0001300	1133	0	12	2	1	1	1	1	0.0002	0.134709	5e-06	0.103562	0.667684	0.527168	0.669144
OG0001309	1139	9	2	3	2	2	1	2	0.0181	0.001643	0.578464	0.212854	0.756447	0.552141	0.392646
OG0001310	1140	0	2	2	2	4	10	4	0.0037	0.134709	0.815016	0.227064	0.186566	0.596275	0.000632
OG0001320	1148	1	1	2	2	4	10	4	0.0106	0.487153	0.487153	0.227064	0.186566	0.596275	0.000632
OG0001328	1156	4	0	3	7	4	3	4	0.0355	0.358884	0.02969	0.59004	0.044709	0.596275	0.552181
OG0001330	1158	1	11	2	1	1	1	1	0.001	0.487153	1.7e-05	0.103562	0.667684	0.527168	0.669144
OG0001333	1161	0	9	3	3	3	2	3	0.005	0.02969	0.001643	0.82989	0.80681	0.575118	0.487472
OG0001339	1167	3	8	4	1	2	2	2	0.047	0.636103	0.026925	0.097051	0.390103	0.552141	0.758042
OG0001350	1178	8	4	4	1	2	1	2	0.0274	0.026925	0.87697	0.097051	0.390103	0.552141	0.392646
OG0001352	1180	11	1	2	1	1	1	1	0.001	1.7e-05	0.487153	0.103562	0.667684	0.527168	0.669144
OG0001353	1181	1	1	2	2	4	10	4	0.0106	0.487153	0.487153	0.227064	0.186566	0.596275	0.000632
OG0001354	1182	1	9	3	1	3	3	3	0.0086	0.214105	0.001643	0.82989	0.133962	0.575118	0.808218
OG0001355	1183	0	0	0	4	4	10	4	0.0093	0.5	0.5	0.003147	0.837624	0.596275	0.000632
OG0001358	1186	6	1	3	1	3	6	3	0.0146	0.056249	0.214105	0.82989	0.133962	0.575118	0.024158
OG0001359	1187	0	4	3	1	4	9	4	0.0009	0.02969	0.358884	0.59004	0.022067	0.596275	0.003556
OG0001362	1190	0	0	0	1	2	13	3	0	0.5	0.5	0.045459	0.390103	0.113254	1e-06
OG0001366	1194	2	8	4	3	3	1	3	0.04	0.281229	0.026925	0.303546	0.80681	0.575118	0.135793
OG0001371	1198	4	8	4	1	2	1	2	0.0274	0.87697	0.026925	0.097051	0.390103	0.552141	0.392646
OG0001383	1208	7	5	4	1	2	1	2	0.04105	0.098543	0.432973	0.097051	0.390103	0.552141	0.392646
OG0001384	1209	1	7	3	5	3	1	3	0.0124	0.214105	0.01392	0.82989	0.066743	0.575118	0.135793
OG0001412	1233	8	1	3	4	3	1	3	0.0111	0.004866	0.214105	0.82989	0.262103	0.575118	0.135793
OG0001416	1236	8	3	4	2	2	1	2	0.04765	0.026925	0.636103	0.097051	0.756447	0.552141	0.392646
OG0001419	1239	5	0	3	8	4	1	4	0.0008	0.115699	0.02969	0.59004	0.009203	0.596275	0.022669
OG0001422	1242	8	1	3	4	3	1	3	0.0111	0.004866	0.214105	0.82989	0.262103	0.575118	0.135793
OG0001440	1259	1	2	2	1	3	10	3	0.0026	0.487153	0.815016	0.528018	0.133962	0.575118	6.8e-05
OG0001443	1262	1	11	2	1	1	1	1	0.001	0.487153	1.7e-05	0.103562	0.667684	0.527168	0.669144
OG0001445	1263	2	10	3	1	1	1	1	0.0038	0.578464	0.00054	0.022514	0.667684	0.527168	0.669144
OG0001446	1264	2	4	3	7	3	1	3	0.0324	0.578464	0.358884	0.82989	0.004566	0.575118	0.135793
OG0001448	1266	1	6	3	1	3	6	3	0.0146	0.214105	0.056249	0.82989	0.133962	0.575118	0.024158
OG0001449	1267	5	1	3	1	3	7	3	0.0123	0.115699	0.214105	0.82989	0.133962	0.575118	0.004714
OG0001453	1271	4	1	3	1	4	8	4	0.0088	0.358884	0.214105	0.59004	0.022067	0.596275	0.009488
OG0001458	1275	9	3	3	1	1	1	1	0.013	0.001643	0.854833	0.022514	0.667684	0.527168	0.669144
OG0001461	1277	9	2	3	1	2	2	2	0.0177	0.001643	0.578464	0.212854	0.390103	0.552141	0.758042
OG0001463	1279	2	11	3	0	1	1	1	0.0004	0.578464	0.000173	0.022514	0.242993	0.527168	0.669144
OG0001464	1280	2	11	3	0	1	1	1	0.0004	0.578464	0.000173	0.022514	0.242993	0.527168	0.669144
OG0001467	1281	1	12	2	0	1	1	1	0.0002	0.487153	5e-06	0.103562	0.242993	0.527168	0.669144
OG0001470	1282	1	11	3	0	2	2	2	0.0004	0.214105	0.000173	0.212854	0.031859	0.552141	0.758042
OG0001471	1283	3	5	3	0	3	6	3	0.0095	0.854833	0.115699	0.82989	0.010444	0.575118	0.024158
OG0001473	1284	3	8	4	0	3	3	3	0.0097	0.636103	0.026925	0.303546	0.010444	0.575118	0.808218
OG0001474	1285	1	9	3	0	3	4	3	0.0005	0.214105	0.001643	0.82989	0.010444	0.575118	0.26442
OG0001475	1286	7	5	4	0	2	2	2	0.0148	0.098543	0.432973	0.097051	0.031859	0.552141	0.758042
OG0001476	1287	2	3	3	0	3	9	3	0.0014	0.578464	0.854833	0.82989	0.010444	0.575118	0.00029
OG0001477	1288	7	3	4	0	3	4	3	0.0109	0.098543	0.636103	0.303546	0.010444	0.575118	0.26442
OG0001478	1289	1	0	1	0	2	13	3	0	0.728538	0.325493	0.433845	0.031859	0.113254	1e-06
OG0001479	1290	1	0	1	0	2	13	3	0	0.728538	0.325493	0.433845	0.031859	0.113254	1e-06
OG0001481	1292	8	0	3	2	3	3	3	0.0119	0.004866	0.02969	0.82989	0.484917	0.575118	0.808218
OG0001486	1296	2	0	2	8	4	3	4	0.0327	0.815016	0.134709	0.227064	0.009203	0.596275	0.552181
OG0001491	1299	10	1	2	1	1	1	1	0.0023	5.7e-05	0.487153	0.103562	0.667684	0.527168	0.669144
OG0001499	1305	8	1	3	3	3	1	3	0.0176	0.004866	0.214105	0.82989	0.80681	0.575118	0.135793
OG0001501	1306	0	0	0	1	2	12	3	0.0002	0.5	0.5	0.045459	0.390103	0.113254	4e-06
OG0001502	1307	0	10	2	1	2	2	2	0.001	0.134709	5.7e-05	0.783497	0.390103	0.552141	0.758042
OG0001505	1310	1	2	2	8	3	2	3	0.0407	0.487153	0.815016	0.528018	0.001144	0.575118	0.487472
OG0001506	1311	8	1	3	3	3	1	3	0.0176	0.004866	0.214105	0.82989	0.80681	0.575118	0.135793
OG0001510	1312	8	1	3	2	2	2	2	0.0361	0.004866	0.214105	0.212854	0.756447	0.552141	0.758042
OG0001517	1317	3	1	2	8	3	1	3	0.0087	0.256806	0.487153	0.528018	0.001144	0.575118	0.135793
OG0001518	1318	0	10	2	2	2	1	2	0.001	0.134709	5.7e-05	0.783497	0.756447	0.552141	0.392646
OG0001522	1322	1	8	3	1	3	3	3	0.0181	0.214105	0.004866	0.82989	0.133962	0.575118	0.808218
OG0001525	1323	0	6	3	5	3	2	3	0.0191	0.02969	0.056249	0.82989	0.066743	0.575118	0.487472
OG0001527	1325	6	0	3	6	3	1	3	0.0022	0.056249	0.02969	0.82989	0.023575	0.575118	0.135793
OG0001530	1328	3	0	2	8	3	2	3	0.009	0.256806	0.134709	0.528018	0.001144	0.575118	0.487472
OG0001532	1329	1	10	2	1	1	1	1	0.0023	0.487153	5.7e-05	0.103562	0.667684	0.527168	0.669144
OG0001534	1331	0	0	0	8	5	5	5	0.0426	0.5	0.5	0.000604	0.069621	0.615774	0.858953
OG0001537	1334	0	1	1	1	3	11	4	0.0006	0.325493	0.728538	0.167417	0.133962	0.145845	0.000164
OG0001543	1340	9	1	3	1	2	2	2	0.0089	0.001643	0.214105	0.212854	0.390103	0.552141	0.758042
OG0001544	1341	0	11	2	1	1	1	1	0.0003	0.134709	1.7e-05	0.103562	0.667684	0.527168	0.669144
OG0001547	1343	1	1	1	1	3	10	3	0.0024	0.728538	0.728538	0.167417	0.133962	0.575118	6.8e-05
OG0001551	1346	2	8	3	2	2	1	2	0.03835	0.578464	0.004866	0.212854	0.756447	0.552141	0.392646
OG0001555	1350	2	1	2	1	3	9	3	0.0064	0.815016	0.487153	0.528018	0.133962	0.575118	0.00029
OG0001569	1364	1	7	3	4	3	1	3	0.0207	0.214105	0.01392	0.82989	0.262103	0.575118	0.135793
OG0001578	1372	1	0	1	1	3	11	4	0.0006	0.728538	0.325493	0.167417	0.133962	0.145845	0.000164
OG0001579	1373	10	0	2	1	2	2	2	0.001	5.7e-05	0.134709	0.783497	0.390103	0.552141	0.758042
OG0001580	1374	2	8	3	2	2	1	2	0.03835	0.578464	0.004866	0.212854	0.756447	0.552141	0.392646
OG0001596	1388	1	0	1	1	3	11	4	0.0006	0.728538	0.325493	0.167417	0.133962	0.145845	0.000164
OG0001599	1391	1	0	1	1	3	11	4	0.0006	0.728538	0.325493	0.167417	0.133962	0.145845	0.000164
OG0001603	1395	3	0	2	8	3	2	3	0.009	0.256806	0.134709	0.528018	0.001144	0.575118	0.487472
OG0001609	1399	2	1	2	1	3	9	3	0.0064	0.815016	0.487153	0.528018	0.133962	0.575118	0.00029
OG0001610	1400	4	0	2	8	3	1	3	0.0013	0.066855	0.134709	0.528018	0.001144	0.575118	0.135793
OG0001615	1404	1	8	3	1	3	3	3	0.0181	0.214105	0.004866	0.82989	0.133962	0.575118	0.808218
OG0001616	1405	8	2	3	1	2	2	2	0.03785	0.004866	0.578464	0.212854	0.390103	0.552141	0.758042
OG0001635	1421	0	0	0	2	3	11	4	0.0014	0.5	0.5	0.017082	0.484917	0.145845	0.000164
OG0001638	1423	8	1	3	2	2	2	2	0.0361	0.004866	0.214105	0.212854	0.756447	0.552141	0.758042
OG0001639	1424	0	7	3	2	3	4	3	0.0172	0.02969	0.01392	0.82989	0.484917	0.575118	0.26442
OG0001640	1425	1	7	3	1	3	4	3	0.0223	0.214105	0.01392	0.82989	0.133962	0.575118	0.26442
OG0001647	1432	9	1	3	1	2	2	2	0.0089	0.001643	0.214105	0.212854	0.390103	0.552141	0.758042
OG0001650	1435	7	1	3	4	3	1	3	0.0207	0.01392	0.214105	0.82989	0.262103	0.575118	0.135793
OG0001653	1438	2	8	3	1	2	2	2	0.03785	0.578464	0.004866	0.212854	0.390103	0.552141	0.758042
OG0001660	1445	1	1	1	1	3	10	3	0.0024	0.728538	0.728538	0.167417	0.133962	0.575118	6.8e-05
OG0001674	1459	3	8	3	1	1	1	1	0.0281	0.854833	0.004866	0.022514	0.667684	0.527168	0.669144
OG0001680	1465	2	9	3	1	1	1	1	0.0107	0.578464	0.001643	0.022514	0.667684	0.527168	0.669144
OG0001689	1473	1	3	2	1	3	8	3	0.0139	0.487153	0.256806	0.528018	0.133962	0.575118	0.001192
OG0001692	1476	1	0	1	1	3	11	4	0.0006	0.728538	0.325493	0.167417	0.133962	0.145845	0.000164
OG0001695	1479	8	0	3	4	3	1	3	0.0026	0.004866	0.02969	0.82989	0.262103	0.575118	0.135793
OG0001698	1482	1	5	3	1	3	6	3	0.0264	0.214105	0.115699	0.82989	0.133962	0.575118	0.024158
OG0001703	1487	10	1	2	1	1	1	1	0.0023	5.7e-05	0.487153	0.103562	0.667684	0.527168	0.669144
OG0001707	1491	2	1	2	1	3	9	3	0.0064	0.815016	0.487153	0.528018	0.133962	0.575118	0.00029
OG0001709	1493	8	2	3	2	2	1	2	0.03835	0.004866	0.578464	0.212854	0.756447	0.552141	0.392646
OG0001717	1500	2	9	3	1	1	1	1	0.0107	0.578464	0.001643	0.022514	0.667684	0.527168	0.669144
OG0001719	1502	1	2	2	1	3	9	3	0.0064	0.487153	0.815016	0.528018	0.133962	0.575118	0.00029
OG0001720	1503	9	2	3	0	2	2	2	0.003	0.001643	0.578464	0.212854	0.031859	0.552141	0.758042
OG0001721	1504	5	6	4	0	2	2	2	0.0254	0.432973	0.167843	0.097051	0.031859	0.552141	0.758042
OG0001723	1505	8	4	4	0	1	1	1	0.0054	0.026925	0.87697	0.004895	0.242993	0.527168	0.669144
OG0001724	1506	3	7	4	0	3	3	3	0.018	0.636103	0.098543	0.303546	0.010444	0.575118	0.808218
OG0001725	1507	3	9	3	0	1	1	1	0.0025	0.854833	0.001643	0.022514	0.242993	0.527168	0.669144
OG0001728	1508	0	12	2	0	1	1	1	0	0.134709	5e-06	0.103562	0.242993	0.527168	0.669144
OG0001731	1509	0	11	3	0	2	2	2	0.0002	0.02969	0.000173	0.212854	0.031859	0.552141	0.758042
OG0001732	1510	1	6	3	0	3	6	3	0.0015	0.214105	0.056249	0.82989	0.010444	0.575118	0.024158
OG0001735	1511	1	0	1	0	2	12	3	0	0.728538	0.325493	0.433845	0.031859	0.113254	4e-06
OG0001736	1512	1	0	1	0	2	12	3	0	0.728538	0.325493	0.433845	0.031859	0.113254	4e-06
OG0001739	1513	2	2	2	7	3	1	3	0.0399	0.815016	0.815016	0.528018	0.004566	0.575118	0.135793
OG0001741	1515	2	2	2	7	3	1	3	0.0399	0.815016	0.815016	0.528018	0.004566	0.575118	0.135793
OG0001742	1516	1	8	3	1	2	2	2	0.0203	0.214105	0.004866	0.212854	0.390103	0.552141	0.758042
OG0001743	1517	0	0	0	11	2	1	2	0.0002	0.5	0.5	0.045459	1e-06	0.552141	0.392646
OG0001748	1522	0	2	2	9	3	1	3	0.001	0.134709	0.815016	0.528018	0.000275	0.575118	0.135793
OG0001758	1528	9	0	2	2	2	1	2	0.0023	0.000195	0.134709	0.783497	0.756447	0.552141	0.392646
OG0001761	1530	0	0	0	1	2	11	3	0.0004	0.5	0.5	0.045459	0.390103	0.113254	1.6e-05
OG0001765	1533	9	1	2	1	1	1	1	0.0046	0.000195	0.487153	0.103562	0.667684	0.527168	0.669144
OG0001781	1548	2	0	2	8	3	2	3	0.0135	0.815016	0.134709	0.528018	0.001144	0.575118	0.487472
OG0001784	1551	7	1	3	3	3	1	3	0.0359	0.01392	0.214105	0.82989	0.80681	0.575118	0.135793
OG0001795	1561	4	0	2	6	3	2	3	0.0314	0.066855	0.134709	0.528018	0.023575	0.575118	0.487472
OG0001801	1567	0	0	0	2	3	10	3	0.0028	0.5	0.5	0.017082	0.484917	0.575118	6.8e-05
OG0001802	1568	1	8	3	2	2	1	2	0.0204	0.214105	0.004866	0.212854	0.756447	0.552141	0.392646
OG0001803	1569	1	5	3	1	3	5	3	0.0487	0.214105	0.115699	0.82989	0.133962	0.575118	0.067782
OG0001804	1570	3	0	2	8	3	1	3	0.0022	0.256806	0.134709	0.528018	0.001144	0.575118	0.135793
OG0001807	1573	1	9	2	1	1	1	1	0.0046	0.487153	0.000195	0.103562	0.667684	0.527168	0.669144
OG0001814	1579	1	4	3	6	3	1	3	0.034	0.214105	0.358884	0.82989	0.023575	0.575118	0.135793
OG0001816	1580	2	0	2	1	3	9	3	0.0021	0.815016	0.134709	0.528018	0.133962	0.575118	0.00029
OG0001818	1582	0	6	3	1	3	5	3	0.0051	0.02969	0.056249	0.82989	0.133962	0.575118	0.067782
OG0001824	1588	0	0	0	2	3	10	3	0.0028	0.5	0.5	0.017082	0.484917	0.575118	6.8e-05
OG0001826	1590	5	0	3	2	3	5	3	0.03945	0.115699	0.02969	0.82989	0.484917	0.575118	0.067782
OG0001827	1591	2	8	3	1	1	1	1	0.0227	0.578464	0.004866	0.022514	0.667684	0.527168	0.669144
OG0001830	1594	5	0	3	5	3	2	3	0.0346	0.115699	0.02969	0.82989	0.066743	0.575118	0.487472
OG0001838	1600	9	1	2	1	1	1	1	0.0046	0.000195	0.487153	0.103562	0.667684	0.527168	0.669144
OG0001844	1606	1	9	2	1	1	1	1	0.0046	0.487153	0.000195	0.103562	0.667684	0.527168	0.669144
OG0001847	1609	8	1	3	2	2	1	2	0.0204	0.004866	0.214105	0.212854	0.756447	0.552141	0.392646
OG0001848	1610	1	7	3	1	3	3	3	0.038	0.214105	0.01392	0.82989	0.133962	0.575118	0.808218
OG0001853	1614	0	2	2	9	3	1	3	0.001	0.134709	0.815016	0.528018	0.000275	0.575118	0.135793
OG0001861	1619	9	0	2	2	2	1	2	0.0023	0.000195	0.134709	0.783497	0.756447	0.552141	0.392646
OG0001866	1621	9	1	2	1	1	1	1	0.0046	0.000195	0.487153	0.103562	0.667684	0.527168	0.669144
OG0001874	1628	1	2	2	1	3	8	3	0.0186	0.487153	0.815016	0.528018	0.133962	0.575118	0.001192
OG0001878	1631	8	1	3	2	2	1	2	0.0204	0.004866	0.214105	0.212854	0.756447	0.552141	0.392646
OG0001886	1638	2	2	2	7	3	1	3	0.0399	0.815016	0.815016	0.528018	0.004566	0.575118	0.135793
OG0001888	1640	1	9	2	1	1	1	1	0.0046	0.487153	0.000195	0.103562	0.667684	0.527168	0.669144
OG0001891	1643	1	0	1	9	3	2	3	0.0048	0.728538	0.325493	0.167417	0.000275	0.575118	0.487472
OG0001894	1646	1	0	1	2	3	9	3	0.0101	0.728538	0.325493	0.167417	0.484917	0.575118	0.00029
OG0001895	1647	9	1	2	1	1	1	1	0.0046	0.000195	0.487153	0.103562	0.667684	0.527168	0.669144
OG0001896	1648	2	1	2	1	3	8	3	0.0186	0.815016	0.487153	0.528018	0.133962	0.575118	0.001192
OG0001900	1651	5	0	3	5	3	2	3	0.0346	0.115699	0.02969	0.82989	0.066743	0.575118	0.487472
OG0001908	1658	1	7	3	3	3	1	3	0.0359	0.214105	0.01392	0.82989	0.80681	0.575118	0.135793
OG0001912	1662	0	6	3	2	3	4	3	0.0333	0.02969	0.056249	0.82989	0.484917	0.575118	0.26442
OG0001918	1667	9	1	2	1	1	1	1	0.0046	0.000195	0.487153	0.103562	0.667684	0.527168	0.669144
OG0001919	1668	2	1	2	1	3	8	3	0.0186	0.815016	0.487153	0.528018	0.133962	0.575118	0.001192
OG0001932	1678	0	0	0	1	2	11	3	0.0004	0.5	0.5	0.045459	0.390103	0.113254	1.6e-05
OG0001940	1686	8	1	3	1	2	2	2	0.0203	0.004866	0.214105	0.212854	0.390103	0.552141	0.758042
OG0001954	1699	1	1	1	1	3	9	3	0.0063	0.728538	0.728538	0.167417	0.133962	0.575118	0.00029
OG0001957	1702	1	5	3	5	3	1	3	0.0396	0.214105	0.115699	0.82989	0.066743	0.575118	0.135793
OG0001958	1703	2	0	2	1	3	9	3	0.0021	0.815016	0.134709	0.528018	0.133962	0.575118	0.00029
OG0001967	1712	8	1	3	1	2	2	2	0.0203	0.004866	0.214105	0.212854	0.390103	0.552141	0.758042
OG0001968	1713	1	7	3	1	3	3	3	0.038	0.214105	0.01392	0.82989	0.133962	0.575118	0.808218
OG0001969	1714	0	4	2	6	3	2	3	0.0314	0.134709	0.066855	0.528018	0.023575	0.575118	0.487472
OG0001971	1716	1	3	2	1	3	7	3	0.0314	0.487153	0.256806	0.528018	0.133962	0.575118	0.004714
OG0001977	1722	1	6	3	1	3	4	3	0.0487	0.214105	0.056249	0.82989	0.133962	0.575118	0.26442
OG0001983	1728	1	1	1	1	3	9	3	0.0063	0.728538	0.728538	0.167417	0.133962	0.575118	0.00029
OG0001989	1734	1	4	3	1	3	6	3	0.0425	0.214105	0.358884	0.82989	0.133962	0.575118	0.024158
OG0001991	1736	1	9	3	0	2	2	2	0.0022	0.214105	0.001643	0.212854	0.031859	0.552141	0.758042
OG0001994	1737	0	1	1	0	2	11	3	0	0.325493	0.728538	0.433845	0.031859	0.113254	1.6e-05
OG0001995	1738	5	6	4	0	1	1	1	0.0146	0.432973	0.167843	0.004895	0.242993	0.527168	0.669144
OG0001996	1739	9	1	3	0	2	2	2	0.0022	0.001643	0.214105	0.212854	0.031859	0.552141	0.758042
OG0001998	1740	1	10	2	0	1	1	1	0.0007	0.487153	5.7e-05	0.103562	0.242993	0.527168	0.669144
OG0002000	1741	0	11	2	0	1	1	1	0.0001	0.134709	1.7e-05	0.103562	0.242993	0.527168	0.669144
OG0002002	1742	2	9	3	0	1	1	1	0.0022	0.578464	0.001643	0.022514	0.242993	0.527168	0.669144
OG0002003	1743	1	10	2	0	1	1	1	0.0007	0.487153	5.7e-05	0.103562	0.242993	0.527168	0.669144
OG0002005	1744	0	10	2	0	2	2	2	0.0003	0.134709	5.7e-05	0.783497	0.031859	0.552141	0.758042
OG0002007	1745	3	3	3	0	3	6	3	0.0181	0.854833	0.854833	0.82989	0.010444	0.575118	0.024158
OG0002008	1746	2	5	3	0	3	5	3	0.0147	0.578464	0.115699	0.82989	0.010444	0.575118	0.067782
OG0002010	1747	4	6	4	0	2	2	2	0.0331	0.87697	0.167843	0.097051	0.031859	0.552141	0.758042
OG0002011	1748	2	4	3	0	3	6	3	0.0115	0.578464	0.358884	0.82989	0.010444	0.575118	0.024158
OG0002013	1749	3	5	3	0	3	4	3	0.0322	0.854833	0.115699	0.82989	0.010444	0.575118	0.26442
OG0002014	1750	5	5	4	0	2	2	2	0.0393	0.432973	0.432973	0.097051	0.031859	0.552141	0.758042
OG0002015	1751	9	2	3	0	1	1	1	0.0022	0.001643	0.578464	0.022514	0.242993	0.527168	0.669144
OG0002016	1752	2	2	2	0	3	8	3	0.0027	0.815016	0.815016	0.528018	0.010444	0.575118	0.001192
OG0002018	1753	2	8	3	0	2	2	2	0.0082	0.578464	0.004866	0.212854	0.031859	0.552141	0.758042
OG0002020	1754	4	0	2	0	3	8	3	0.0004	0.066855	0.134709	0.528018	0.010444	0.575118	0.001192
OG0002021	1755	1	0	1	0	2	11	3	0	0.728538	0.325493	0.433845	0.031859	0.113254	1.6e-05
OG0002023	1756	1	0	1	0	2	11	3	0	0.728538	0.325493	0.433845	0.031859	0.113254	1.6e-05
OG0002024	1757	2	0	2	0	3	10	3	0.0002	0.815016	0.134709	0.528018	0.010444	0.575118	6.8e-05
OG0002025	1758	1	0	1	0	2	11	3	0	0.728538	0.325493	0.433845	0.031859	0.113254	1.6e-05
OG0002028	1760	1	7	2	1	2	2	2	0.04595	0.487153	0.002175	0.783497	0.390103	0.552141	0.758042
OG0002029	1761	1	2	2	7	3	1	3	0.0275	0.487153	0.815016	0.528018	0.004566	0.575118	0.135793
OG0002030	1762	0	0	0	9	3	2	3	0.004	0.5	0.5	0.017082	0.000275	0.575118	0.487472
OG0002039	1770	1	0	1	9	3	1	3	0.0016	0.728538	0.325493	0.167417	0.000275	0.575118	0.135793
OG0002054	1780	0	3	2	7	3	1	3	0.0054	0.134709	0.256806	0.528018	0.004566	0.575118	0.135793
OG0002059	1784	2	1	2	1	3	7	3	0.041	0.815016	0.487153	0.528018	0.133962	0.575118	0.004714
OG0002061	1786	1	1	1	1	2	8	2	0.0191	0.728538	0.728538	0.433845	0.390103	0.552141	0.000101
OG0002063	1788	0	9	1	1	1	1	1	0.0013	0.325493	1.1e-05	0.693768	0.667684	0.527168	0.669144
OG0002065	1789	1	1	1	1	2	8	2	0.0191	0.728538	0.728538	0.433845	0.390103	0.552141	0.000101
OG0002066	1790	2	1	2	7	3	1	3	0.0275	0.815016	0.487153	0.528018	0.004566	0.575118	0.135793
OG0002074	1798	3	0	2	7	3	1	3	0.0054	0.256806	0.134709	0.528018	0.004566	0.575118	0.135793
OG0002076	1800	2	0	2	8	3	1	3	0.0033	0.815016	0.134709	0.528018	0.001144	0.575118	0.135793
OG0002078	1801	1	1	1	1	2	8	2	0.0191	0.728538	0.728538	0.433845	0.390103	0.552141	0.000101
OG0002080	1802	0	0	0	1	2	10	3	0.0009	0.5	0.5	0.045459	0.390103	0.113254	6.8e-05
OG0002099	1816	1	1	1	1	2	8	2	0.0191	0.728538	0.728538	0.433845	0.390103	0.552141	0.000101
OG0002100	1817	0	9	1	1	1	1	1	0.0013	0.325493	1.1e-05	0.693768	0.667684	0.527168	0.669144
OG0002108	1822	0	7	2	3	2	1	2	0.0086	0.134709	0.002175	0.783497	0.181509	0.552141	0.392646
OG0002117	1830	2	1	2	7	3	1	3	0.0275	0.815016	0.487153	0.528018	0.004566	0.575118	0.135793
OG0002122	1834	1	0	1	2	3	8	3	0.025	0.728538	0.325493	0.167417	0.484917	0.575118	0.001192
OG0002127	1838	0	2	2	2	3	7	3	0.0438	0.134709	0.815016	0.528018	0.484917	0.575118	0.004714
OG0002136	1845	5	0	3	5	3	1	3	0.0107	0.115699	0.02969	0.82989	0.066743	0.575118	0.135793
OG0002137	1846	8	1	2	1	1	1	1	0.0123	0.000656	0.487153	0.103562	0.667684	0.527168	0.669144
OG0002159	1863	0	8	2	1	2	2	2	0.0051	0.134709	0.000656	0.783497	0.390103	0.552141	0.758042
OG0002164	1868	7	1	2	2	2	1	2	0.0455	0.002175	0.487153	0.783497	0.756447	0.552141	0.392646
OG0002167	1871	1	7	2	2	2	1	2	0.0455	0.487153	0.002175	0.783497	0.756447	0.552141	0.392646
OG0002168	1872	0	1	1	2	3	8	3	0.025	0.325493	0.728538	0.167417	0.484917	0.575118	0.001192
OG0002175	1877	8	1	2	1	1	1	1	0.0123	0.000656	0.487153	0.103562	0.667684	0.527168	0.669144
OG0002178	1880	8	0	2	1	2	2	2	0.0051	0.000656	0.134709	0.783497	0.390103	0.552141	0.758042
OG0002183	1885	2	0	2	7	3	2	3	0.0326	0.815016	0.134709	0.528018	0.004566	0.575118	0.487472
OG0002184	1886	7	1	2	1	2	2	2	0.04595	0.002175	0.487153	0.783497	0.390103	0.552141	0.758042
OG0002190	1891	8	1	2	1	1	1	1	0.0123	0.000656	0.487153	0.103562	0.667684	0.527168	0.669144
OG0002196	1895	7	1	2	2	2	1	2	0.0455	0.002175	0.487153	0.783497	0.756447	0.552141	0.392646
OG0002204	1902	1	7	2	1	2	2	2	0.04595	0.487153	0.002175	0.783497	0.390103	0.552141	0.758042
OG0002230	1925	0	1	1	1	3	9	3	0.0024	0.325493	0.728538	0.167417	0.133962	0.575118	0.00029
OG0002242	1935	1	1	1	1	2	8	2	0.0191	0.728538	0.728538	0.433845	0.390103	0.552141	0.000101
OG0002246	1938	2	7	2	1	1	1	1	0.0474	0.815016	0.002175	0.103562	0.667684	0.527168	0.669144
OG0002253	1945	5	0	3	1	3	5	3	0.0124	0.115699	0.02969	0.82989	0.133962	0.575118	0.067782
OG0002256	1948	0	7	2	3	2	1	2	0.0086	0.134709	0.002175	0.783497	0.181509	0.552141	0.392646
OG0002261	1953	0	3	2	1	3	7	3	0.0085	0.134709	0.256806	0.528018	0.133962	0.575118	0.004714
OG0002276	1967	1	8	2	1	1	1	1	0.0123	0.487153	0.000656	0.103562	0.667684	0.527168	0.669144
OG0002280	1971	2	7	2	1	1	1	1	0.0474	0.815016	0.002175	0.103562	0.667684	0.527168	0.669144
OG0002283	1974	0	9	1	1	1	1	1	0.0013	0.325493	1.1e-05	0.693768	0.667684	0.527168	0.669144
OG0002286	1977	7	2	2	1	1	1	1	0.0474	0.002175	0.815016	0.103562	0.667684	0.527168	0.669144
OG0002290	1981	7	2	2	1	1	1	1	0.0474	0.002175	0.815016	0.103562	0.667684	0.527168	0.669144
OG0002291	1982	0	1	1	1	3	9	3	0.0024	0.325493	0.728538	0.167417	0.133962	0.575118	0.00029
OG0002293	1984	1	7	2	1	2	2	2	0.04595	0.487153	0.002175	0.783497	0.390103	0.552141	0.758042
OG0002296	1987	1	7	2	1	2	2	2	0.04595	0.487153	0.002175	0.783497	0.390103	0.552141	0.758042
OG0002304	1994	7	1	2	2	2	1	2	0.0455	0.002175	0.487153	0.783497	0.756447	0.552141	0.392646
OG0002309	1999	0	0	0	1	2	10	3	0.0009	0.5	0.5	0.045459	0.390103	0.113254	6.8e-05
OG0002322	2010	1	2	2	1	3	7	3	0.041	0.487153	0.815016	0.528018	0.133962	0.575118	0.004714
OG0002331	2019	0	1	1	2	3	8	3	0.025	0.325493	0.728538	0.167417	0.484917	0.575118	0.001192
OG0002334	2021	1	8	2	1	1	1	1	0.0123	0.487153	0.000656	0.103562	0.667684	0.527168	0.669144
OG0002338	2024	0	0	0	1	2	10	3	0.0009	0.5	0.5	0.045459	0.390103	0.113254	6.8e-05
OG0002339	2025	1	7	2	1	2	2	2	0.04595	0.487153	0.002175	0.783497	0.390103	0.552141	0.758042
OG0002341	2027	1	2	2	1	3	7	3	0.041	0.487153	0.815016	0.528018	0.133962	0.575118	0.004714
OG0002349	2035	0	1	1	1	3	9	3	0.0024	0.325493	0.728538	0.167417	0.133962	0.575118	0.00029
OG0002355	2039	2	8	3	0	1	1	1	0.0042	0.578464	0.004866	0.022514	0.242993	0.527168	0.669144
OG0002356	2040	3	7	3	0	1	1	1	0.0123	0.854833	0.01392	0.022514	0.242993	0.527168	0.669144
OG0002359	2041	7	1	2	0	2	3	2	0.0067	0.002175	0.487153	0.783497	0.031859	0.552141	0.183233
OG0002360	2042	1	6	3	0	3	4	3	0.0079	0.214105	0.056249	0.82989	0.010444	0.575118	0.26442
OG0002361	2043	2	8	3	0	1	1	1	0.0042	0.578464	0.004866	0.022514	0.242993	0.527168	0.669144
OG0002362	2044	2	8	3	0	1	1	1	0.0042	0.578464	0.004866	0.022514	0.242993	0.527168	0.669144
OG0002363	2045	0	9	2	0	2	2	2	0.0004	0.134709	0.000195	0.783497	0.031859	0.552141	0.758042
OG0002364	2046	1	9	2	0	1	1	1	0.0012	0.487153	0.000195	0.103562	0.242993	0.527168	0.669144
OG0002367	2047	1	9	2	0	1	1	1	0.0012	0.487153	0.000195	0.103562	0.242993	0.527168	0.669144
OG0002370	2049	3	2	3	0	3	6	3	0.0173	0.854833	0.578464	0.82989	0.010444	0.575118	0.024158
OG0002372	2050	7	3	3	0	1	1	1	0.0123	0.01392	0.854833	0.022514	0.242993	0.527168	0.669144
OG0002379	2052	5	5	3	0	1	1	1	0.0238	0.115699	0.115699	0.022514	0.242993	0.527168	0.669144
OG0002381	2053	9	1	2	0	1	1	1	0.0012	0.000195	0.487153	0.103562	0.242993	0.527168	0.669144
OG0002384	2055	3	3	3	0	3	5	3	0.0343	0.854833	0.854833	0.82989	0.010444	0.575118	0.067782
OG0002386	2057	8	0	2	0	2	3	2	0.0005	0.000656	0.134709	0.783497	0.031859	0.552141	0.183233
OG0002387	2058	1	0	1	0	2	10	3	0.0002	0.728538	0.325493	0.433845	0.031859	0.113254	6.8e-05
OG0002388	2059	7	0	2	0	2	4	2	0.0005	0.002175	0.134709	0.783497	0.031859	0.552141	0.0736
OG0002392	2060	0	0	0	8	3	2	3	0.0118	0.5	0.5	0.017082	0.001144	0.575118	0.487472
OG0002395	2062	0	0	0	9	2	1	2	0.0012	0.5	0.5	0.045459	2e-05	0.552141	0.392646
OG0002400	2065	7	0	2	2	2	1	2	0.0127	0.002175	0.134709	0.783497	0.756447	0.552141	0.392646
OG0002403	2068	0	7	2	2	2	1	2	0.0127	0.134709	0.002175	0.783497	0.756447	0.552141	0.392646
OG0002423	2083	1	1	1	1	2	7	2	0.0441	0.728538	0.728538	0.433845	0.390103	0.552141	0.000468
OG0002439	2097	4	0	2	5	2	1	2	0.019	0.066855	0.134709	0.783497	0.009079	0.552141	0.392646
OG0002442	2100	7	0	2	2	2	1	2	0.0127	0.002175	0.134709	0.783497	0.756447	0.552141	0.392646
OG0002455	2110	0	0	0	8	3	2	3	0.0118	0.5	0.5	0.017082	0.001144	0.575118	0.487472
OG0002460	2113	8	0	1	1	1	1	1	0.003	4.1e-05	0.325493	0.693768	0.667684	0.527168	0.669144
OG0002488	2135	7	0	2	2	2	1	2	0.0127	0.002175	0.134709	0.783497	0.756447	0.552141	0.392646
OG0002494	2139	4	0	2	5	2	1	2	0.019	0.066855	0.134709	0.783497	0.009079	0.552141	0.392646
OG0002495	2140	4	0	2	5	2	1	2	0.019	0.066855	0.134709	0.783497	0.009079	0.552141	0.392646
OG0002501	2145	0	8	1	1	1	1	1	0.003	0.325493	4.1e-05	0.693768	0.667684	0.527168	0.669144
OG0002514	2156	0	0	0	1	2	9	3	0.0026	0.5	0.5	0.045459	0.390103	0.113254	0.00029
OG0002527	2166	2	0	2	7	3	1	3	0.0088	0.815016	0.134709	0.528018	0.004566	0.575118	0.135793
OG0002531	2169	5	0	2	4	2	1	2	0.0204	0.022199	0.134709	0.783497	0.072317	0.552141	0.392646
OG0002537	2173	1	0	1	8	2	1	2	0.0044	0.728538	0.325493	0.433845	9.6e-05	0.552141	0.392646
OG0002538	2174	6	0	2	3	2	1	2	0.018	0.007054	0.134709	0.783497	0.181509	0.552141	0.392646
OG0002547	2181	0	0	0	1	2	9	3	0.0026	0.5	0.5	0.045459	0.390103	0.113254	0.00029
OG0002548	2182	1	0	1	8	2	1	2	0.0044	0.728538	0.325493	0.433845	9.6e-05	0.552141	0.392646
OG0002557	2190	0	1	1	1	2	8	2	0.0075	0.325493	0.728538	0.433845	0.390103	0.552141	0.000101
OG0002560	2193	7	1	2	1	1	1	1	0.028	0.002175	0.487153	0.103562	0.667684	0.527168	0.669144
OG0002571	2201	0	2	2	7	3	1	3	0.0088	0.134709	0.815016	0.528018	0.004566	0.575118	0.135793
OG0002578	2207	0	0	0	1	2	9	3	0.0026	0.5	0.5	0.045459	0.390103	0.113254	0.00029
OG0002594	2220	7	1	2	1	1	1	1	0.028	0.002175	0.487153	0.103562	0.667684	0.527168	0.669144
OG0002595	2221	1	1	1	7	2	1	2	0.0258	0.728538	0.728538	0.433845	0.000448	0.552141	0.392646
OG0002606	2231	7	1	2	1	1	1	1	0.028	0.002175	0.487153	0.103562	0.667684	0.527168	0.669144
OG0002634	2257	1	1	1	1	2	7	2	0.0441	0.728538	0.728538	0.433845	0.390103	0.552141	0.000468
OG0002642	2263	7	1	2	1	1	1	1	0.028	0.002175	0.487153	0.103562	0.667684	0.527168	0.669144
OG0002643	2264	2	0	2	7	3	1	3	0.0088	0.815016	0.134709	0.528018	0.004566	0.575118	0.135793
OG0002649	2270	3	0	2	1	3	6	3	0.021	0.256806	0.134709	0.528018	0.133962	0.575118	0.024158
OG0002658	2278	2	0	2	1	3	7	3	0.0151	0.815016	0.134709	0.528018	0.133962	0.575118	0.004714
OG0002666	2284	0	8	1	1	1	1	1	0.003	0.325493	4.1e-05	0.693768	0.667684	0.527168	0.669144
OG0002676	2293	1	7	2	1	1	1	1	0.028	0.487153	0.002175	0.103562	0.667684	0.527168	0.669144
OG0002682	2298	8	0	1	1	1	1	1	0.003	4.1e-05	0.325493	0.693768	0.667684	0.527168	0.669144
OG0002695	2310	1	7	2	1	1	1	1	0.028	0.487153	0.002175	0.103562	0.667684	0.527168	0.669144
OG0002703	2316	0	1	1	1	2	8	2	0.0075	0.325493	0.728538	0.433845	0.390103	0.552141	0.000101
OG0002721	2332	0	0	0	2	3	8	3	0.0227	0.5	0.5	0.017082	0.484917	0.575118	0.001192
OG0002736	2347	1	1	1	1	2	7	2	0.0441	0.728538	0.728538	0.433845	0.390103	0.552141	0.000468
OG0002744	2354	1	7	2	1	1	1	1	0.028	0.487153	0.002175	0.103562	0.667684	0.527168	0.669144
OG0002766	2375	7	1	2	1	1	1	1	0.028	0.002175	0.487153	0.103562	0.667684	0.527168	0.669144
OG0002787	2396	1	7	2	1	1	1	1	0.028	0.487153	0.002175	0.103562	0.667684	0.527168	0.669144
OG0002793	2402	1	7	2	1	1	1	1	0.028	0.487153	0.002175	0.103562	0.667684	0.527168	0.669144
OG0002810	2417	1	0	1	1	2	8	2	0.0075	0.728538	0.325493	0.433845	0.390103	0.552141	0.000101
OG0002821	2423	0	1	1	0	2	9	3	0.0004	0.325493	0.728538	0.433845	0.031859	0.113254	0.00029
OG0002822	2424	0	9	1	0	1	1	1	0.0007	0.325493	1.1e-05	0.693768	0.242993	0.527168	0.669144
OG0002824	2426	5	1	2	0	2	4	2	0.0158	0.022199	0.487153	0.783497	0.031859	0.552141	0.0736
OG0002825	2427	4	5	3	0	1	1	1	0.0335	0.358884	0.115699	0.022514	0.242993	0.527168	0.669144
OG0002827	2428	7	2	2	0	1	1	1	0.01105	0.002175	0.815016	0.103562	0.242993	0.527168	0.669144
OG0002828	2429	2	2	2	0	2	6	2	0.0197	0.815016	0.815016	0.783497	0.031859	0.552141	0.002124
OG0002829	2430	1	2	2	0	2	7	2	0.0054	0.487153	0.815016	0.783497	0.031859	0.552141	0.000468
OG0002831	2431	0	9	1	0	1	1	1	0.0007	0.325493	1.1e-05	0.693768	0.242993	0.527168	0.669144
OG0002833	2432	5	1	2	0	2	4	2	0.0158	0.022199	0.487153	0.783497	0.031859	0.552141	0.0736
OG0002839	2435	1	1	1	0	2	8	2	0.0026	0.728538	0.728538	0.433845	0.031859	0.552141	0.000101
OG0002842	2437	0	1	1	0	2	9	3	0.0004	0.325493	0.728538	0.433845	0.031859	0.113254	0.00029
OG0002843	2438	4	5	3	0	1	1	1	0.0335	0.358884	0.115699	0.022514	0.242993	0.527168	0.669144
OG0002844	2439	4	5	3	0	1	1	1	0.0335	0.358884	0.115699	0.022514	0.242993	0.527168	0.669144
OG0002845	2440	6	0	2	0	2	4	2	0.0022	0.007054	0.134709	0.783497	0.031859	0.552141	0.0736
OG0002846	2441	1	0	1	0	2	9	3	0.0004	0.728538	0.325493	0.433845	0.031859	0.113254	0.00029
OG0002847	2442	1	0	1	0	2	9	3	0.0004	0.728538	0.325493	0.433845	0.031859	0.113254	0.00029
OG0002871	2457	0	3	2	5	2	1	2	0.0351	0.134709	0.256806	0.783497	0.009079	0.552141	0.392646
OG0002886	2468	0	1	1	1	2	7	2	0.0207	0.325493	0.728538	0.433845	0.390103	0.552141	0.000468
OG0002901	2478	6	0	2	2	2	1	2	0.03035	0.007054	0.134709	0.783497	0.756447	0.552141	0.392646
OG0002926	2494	0	5	2	3	2	1	2	0.03625	0.134709	0.022199	0.783497	0.181509	0.552141	0.392646
OG0002942	2507	0	6	2	2	2	1	2	0.03035	0.134709	0.007054	0.783497	0.756447	0.552141	0.392646
OG0002952	2514	0	7	1	1	1	1	1	0.0087	0.325493	0.000155	0.693768	0.667684	0.527168	0.669144
OG0002972	2531	0	0	0	1	2	8	2	0.0078	0.5	0.5	0.045459	0.390103	0.552141	0.000101
OG0002978	2535	0	4	2	4	2	1	2	0.04365	0.134709	0.066855	0.783497	0.072317	0.552141	0.392646
OG0002998	2548	3	0	2	5	2	1	2	0.0351	0.256806	0.134709	0.783497	0.009079	0.552141	0.392646
OG0003048	2587	0	5	2	3	2	1	2	0.03625	0.134709	0.022199	0.783497	0.181509	0.552141	0.392646
OG0003059	2596	6	0	2	2	2	1	2	0.03035	0.007054	0.134709	0.783497	0.756447	0.552141	0.392646
OG0003066	2603	5	0	2	3	2	1	2	0.03625	0.022199	0.134709	0.783497	0.181509	0.552141	0.392646
OG0003070	2607	1	0	1	7	2	1	2	0.0126	0.728538	0.325493	0.433845	0.000448	0.552141	0.392646
OG0003071	2608	0	6	2	1	2	2	2	0.0315	0.134709	0.007054	0.783497	0.390103	0.552141	0.758042
OG0003094	2629	2	0	2	6	3	1	3	0.0219	0.815016	0.134709	0.528018	0.023575	0.575118	0.135793
OG0003101	2634	0	7	1	1	1	1	1	0.0087	0.325493	0.000155	0.693768	0.667684	0.527168	0.669144
OG0003124	2655	7	0	1	1	1	1	1	0.0087	0.000155	0.325493	0.693768	0.667684	0.527168	0.669144
OG0003178	2702	0	0	0	1	2	8	2	0.0078	0.5	0.5	0.045459	0.390103	0.552141	0.000101
OG0003198	2721	7	0	1	1	1	1	1	0.0087	0.000155	0.325493	0.693768	0.667684	0.527168	0.669144
OG0003226	2746	0	6	2	1	2	2	2	0.0315	0.134709	0.007054	0.783497	0.390103	0.552141	0.758042
OG0003250	2766	1	0	1	1	2	7	2	0.0207	0.728538	0.325493	0.433845	0.390103	0.552141	0.000468
OG0003257	2773	0	7	1	1	1	1	1	0.0087	0.325493	0.000155	0.693768	0.667684	0.527168	0.669144
OG0003272	2787	0	1	1	1	2	7	2	0.0207	0.325493	0.728538	0.433845	0.390103	0.552141	0.000468
OG0003307	2819	0	2	2	1	3	6	3	0.0333	0.134709	0.815016	0.528018	0.133962	0.575118	0.024158
OG0003354	2864	0	0	0	1	2	8	2	0.0078	0.5	0.5	0.045459	0.390103	0.552141	0.000101
OG0003375	2884	7	0	1	1	1	1	1	0.0087	0.000155	0.325493	0.693768	0.667684	0.527168	0.669144
OG0003376	2885	0	1	1	1	2	7	2	0.0207	0.325493	0.728538	0.433845	0.390103	0.552141	0.000468
OG0003382	2890	1	4	2	0	2	4	2	0.0282	0.487153	0.066855	0.783497	0.031859	0.552141	0.0736
OG0003387	2892	1	6	2	0	2	2	2	0.0236	0.487153	0.007054	0.783497	0.031859	0.552141	0.758042
OG0003389	2893	2	2	2	0	2	5	2	0.0478	0.815016	0.815016	0.783497	0.031859	0.552141	0.009311
OG0003390	2894	2	6	2	0	1	1	1	0.02315	0.815016	0.007054	0.103562	0.242993	0.527168	0.669144
OG0003392	2895	0	8	1	0	1	1	1	0.001	0.325493	4.1e-05	0.693768	0.242993	0.527168	0.669144
OG0003394	2896	0	3	2	0	2	6	2	0.003	0.134709	0.256806	0.783497	0.031859	0.552141	0.002124
OG0003401	2899	3	1	2	0	2	5	2	0.0221	0.256806	0.487153	0.783497	0.031859	0.552141	0.009311
OG0003403	2901	0	1	1	0	2	8	2	0.0011	0.325493	0.728538	0.433845	0.031859	0.552141	0.000101
OG0003404	2902	6	2	2	0	1	1	1	0.02315	0.007054	0.815016	0.103562	0.242993	0.527168	0.669144
OG0003405	2903	1	7	2	0	1	1	1	0.00785	0.487153	0.002175	0.103562	0.242993	0.527168	0.669144
OG0003407	2904	1	7	2	0	1	1	1	0.00785	0.487153	0.002175	0.103562	0.242993	0.527168	0.669144
OG0003414	2907	0	8	1	0	1	1	1	0.001	0.325493	4.1e-05	0.693768	0.242993	0.527168	0.669144
OG0003415	2908	4	1	2	0	2	4	2	0.0282	0.066855	0.487153	0.783497	0.031859	0.552141	0.0736
OG0003419	2910	1	1	1	0	2	7	2	0.0076	0.728538	0.728538	0.433845	0.031859	0.552141	0.000468
OG0003420	2911	2	6	2	0	1	1	1	0.02315	0.815016	0.007054	0.103562	0.242993	0.527168	0.669144
OG0003421	2912	3	5	3	0	1	1	1	0.04315	0.854833	0.115699	0.022514	0.242993	0.527168	0.669144
OG0003425	2913	0	7	2	0	2	2	2	0.0025	0.134709	0.002175	0.783497	0.031859	0.552141	0.758042
OG0003426	2914	2	6	2	0	1	1	1	0.02315	0.815016	0.007054	0.103562	0.242993	0.527168	0.669144
OG0003427	2915	2	6	2	0	1	1	1	0.02315	0.815016	0.007054	0.103562	0.242993	0.527168	0.669144
OG0003428	2916	0	7	2	0	2	2	2	0.0025	0.134709	0.002175	0.783497	0.031859	0.552141	0.758042
OG0003430	2918	2	2	2	0	2	5	2	0.0478	0.815016	0.815016	0.783497	0.031859	0.552141	0.009311
OG0003431	2919	5	3	3	0	1	1	1	0.04315	0.115699	0.854833	0.022514	0.242993	0.527168	0.669144
OG0003433	2921	7	1	2	0	1	1	1	0.00785	0.002175	0.487153	0.103562	0.242993	0.527168	0.669144
OG0003435	2922	3	0	2	0	2	6	2	0.003	0.256806	0.134709	0.783497	0.031859	0.552141	0.002124
OG0003436	2923	8	0	1	0	1	1	1	0.001	4.1e-05	0.325493	0.693768	0.242993	0.527168	0.669144
OG0003437	2924	8	0	1	0	1	1	1	0.001	4.1e-05	0.325493	0.693768	0.242993	0.527168	0.669144
OG0003438	2925	1	0	1	0	2	8	2	0.0011	0.728538	0.325493	0.433845	0.031859	0.552141	0.000101
OG0003439	2926	8	0	1	0	1	1	1	0.001	4.1e-05	0.325493	0.693768	0.242993	0.527168	0.669144
OG0003440	2927	1	0	1	0	2	8	2	0.0011	0.728538	0.325493	0.433845	0.031859	0.552141	0.000101
OG0003441	2928	1	0	1	0	2	8	2	0.0011	0.728538	0.325493	0.433845	0.031859	0.552141	0.000101
OG0003442	2929	3	0	2	0	2	6	2	0.003	0.256806	0.134709	0.783497	0.031859	0.552141	0.002124
OG0003443	2930	5	0	2	0	2	4	2	0.0043	0.022199	0.134709	0.783497	0.031859	0.552141	0.0736
OG0003447	2931	0	1	1	6	2	1	2	0.033	0.325493	0.728538	0.433845	0.002051	0.552141	0.392646
OG0003466	2944	1	0	1	6	2	1	2	0.033	0.728538	0.325493	0.433845	0.002051	0.552141	0.392646
OG0003561	3010	0	0	0	1	2	7	2	0.0207	0.5	0.5	0.045459	0.390103	0.552141	0.000468
OG0003579	3025	0	0	0	7	2	1	2	0.012	0.5	0.5	0.045459	0.000448	0.552141	0.392646
OG0003630	3061	1	0	1	6	2	1	2	0.033	0.728538	0.325493	0.433845	0.002051	0.552141	0.392646
OG0003685	3105	1	0	1	6	2	1	2	0.033	0.728538	0.325493	0.433845	0.002051	0.552141	0.392646
OG0003742	3151	0	0	0	1	2	7	2	0.0207	0.5	0.5	0.045459	0.390103	0.552141	0.000468
OG0003775	3178	0	0	0	1	2	7	2	0.0207	0.5	0.5	0.045459	0.390103	0.552141	0.000468
OG0003804	3203	6	0	1	1	1	1	1	0.022	0.000587	0.325493	0.693768	0.667684	0.527168	0.669144
OG0003830	3224	6	0	1	1	1	1	1	0.022	0.000587	0.325493	0.693768	0.667684	0.527168	0.669144
OG0003832	3225	0	6	1	1	1	1	1	0.022	0.325493	0.000587	0.693768	0.667684	0.527168	0.669144
OG0003978	3344	6	0	1	1	1	1	1	0.022	0.000587	0.325493	0.693768	0.667684	0.527168	0.669144
OG0004137	3487	0	0	0	1	2	7	2	0.0207	0.5	0.5	0.045459	0.390103	0.552141	0.000468
OG0004228	3568	6	1	2	0	1	1	1	0.01935	0.007054	0.487153	0.103562	0.242993	0.527168	0.669144
OG0004230	3569	0	1	1	0	2	7	2	0.0038	0.325493	0.728538	0.433845	0.031859	0.552141	0.000468
OG0004231	3570	1	2	2	0	2	5	2	0.0375	0.487153	0.815016	0.783497	0.031859	0.552141	0.009311
OG0004232	3571	0	7	1	0	1	1	1	0.0023	0.325493	0.000155	0.693768	0.242993	0.527168	0.669144
OG0004233	3572	0	7	1	0	1	1	1	0.0023	0.325493	0.000155	0.693768	0.242993	0.527168	0.669144
OG0004235	3574	5	2	2	0	1	1	1	0.0441	0.022199	0.815016	0.103562	0.242993	0.527168	0.669144
OG0004243	3575	0	1	1	0	2	7	2	0.0038	0.325493	0.728538	0.433845	0.031859	0.552141	0.000468
OG0004245	3577	0	6	2	0	2	2	2	0.0071	0.134709	0.007054	0.783497	0.031859	0.552141	0.758042
OG0004247	3579	0	5	2	0	2	3	2	0.0077	0.134709	0.022199	0.783497	0.031859	0.552141	0.183233
OG0004249	3580	1	6	2	0	1	1	1	0.01935	0.487153	0.007054	0.103562	0.242993	0.527168	0.669144
OG0004253	3581	1	1	1	0	2	6	2	0.0197	0.728538	0.728538	0.433845	0.031859	0.552141	0.002124
OG0004254	3582	6	1	2	0	1	1	1	0.01935	0.007054	0.487153	0.103562	0.242993	0.527168	0.669144
OG0004259	3586	2	5	2	0	1	1	1	0.0441	0.815016	0.022199	0.103562	0.242993	0.527168	0.669144
OG0004264	3587	0	7	1	0	1	1	1	0.0023	0.325493	0.000155	0.693768	0.242993	0.527168	0.669144
OG0004266	3588	0	3	2	0	2	5	2	0.008	0.134709	0.256806	0.783497	0.031859	0.552141	0.009311
OG0004267	3589	1	1	1	0	2	6	2	0.0197	0.728538	0.728538	0.433845	0.031859	0.552141	0.002124
OG0004269	3590	0	7	1	0	1	1	1	0.0023	0.325493	0.000155	0.693768	0.242993	0.527168	0.669144
OG0004279	3598	0	6	2	0	2	2	2	0.0071	0.134709	0.007054	0.783497	0.031859	0.552141	0.758042
OG0004282	3599	5	2	2	0	1	1	1	0.0441	0.022199	0.815016	0.103562	0.242993	0.527168	0.669144
OG0004284	3600	0	7	1	0	1	1	1	0.0023	0.325493	0.000155	0.693768	0.242993	0.527168	0.669144
OG0004285	3601	0	1	1	0	2	7	2	0.0038	0.325493	0.728538	0.433845	0.031859	0.552141	0.000468
OG0004286	3602	6	1	2	0	1	1	1	0.01935	0.007054	0.487153	0.103562	0.242993	0.527168	0.669144
OG0004288	3603	0	1	1	0	2	7	2	0.0038	0.325493	0.728538	0.433845	0.031859	0.552141	0.000468
OG0004290	3605	0	1	1	0	2	7	2	0.0038	0.325493	0.728538	0.433845	0.031859	0.552141	0.000468
OG0004291	3606	4	0	2	0	2	4	2	0.0087	0.066855	0.134709	0.783497	0.031859	0.552141	0.0736
OG0004294	3607	7	0	1	0	1	1	1	0.0023	0.000155	0.325493	0.693768	0.242993	0.527168	0.669144
OG0004295	3608	7	0	1	0	1	1	1	0.0023	0.000155	0.325493	0.693768	0.242993	0.527168	0.669144
OG0004296	3609	7	0	1	0	1	1	1	0.0023	0.000155	0.325493	0.693768	0.242993	0.527168	0.669144
OG0004494	3765	5	0	1	1	1	1	1	0.04925	0.002232	0.325493	0.693768	0.667684	0.527168	0.669144
OG0004693	3914	5	0	1	1	1	1	1	0.04925	0.002232	0.325493	0.693768	0.667684	0.527168	0.669144
OG0005139	4290	5	0	1	1	1	1	1	0.04925	0.002232	0.325493	0.693768	0.667684	0.527168	0.669144
OG0005241	4387	0	5	1	1	1	1	1	0.04925	0.325493	0.002232	0.693768	0.667684	0.527168	0.669144
OG0005247	4392	5	0	1	1	1	1	1	0.04925	0.002232	0.325493	0.693768	0.667684	0.527168	0.669144
OG0005288	4428	0	6	1	0	1	1	1	0.0074	0.325493	0.000587	0.693768	0.242993	0.527168	0.669144
OG0005293	4429	1	5	2	0	1	1	1	0.0392	0.487153	0.022199	0.103562	0.242993	0.527168	0.669144
OG0005299	4431	0	6	1	0	1	1	1	0.0074	0.325493	0.000587	0.693768	0.242993	0.527168	0.669144
OG0005303	4433	1	5	2	0	1	1	1	0.0392	0.487153	0.022199	0.103562	0.242993	0.527168	0.669144
OG0005317	4437	0	6	1	0	1	1	1	0.0074	0.325493	0.000587	0.693768	0.242993	0.527168	0.669144
OG0005320	4440	0	2	2	0	2	5	2	0.0146	0.134709	0.815016	0.783497	0.031859	0.552141	0.009311
OG0005322	4442	0	1	1	0	2	6	2	0.0097	0.325493	0.728538	0.433845	0.031859	0.552141	0.002124
OG0005326	4445	0	1	1	0	2	6	2	0.0097	0.325493	0.728538	0.433845	0.031859	0.552141	0.002124
OG0005327	4446	0	6	1	0	1	1	1	0.0074	0.325493	0.000587	0.693768	0.242993	0.527168	0.669144
OG0005328	4447	5	1	2	0	1	1	1	0.0392	0.022199	0.487153	0.103562	0.242993	0.527168	0.669144
OG0005329	4448	0	6	1	0	1	1	1	0.0074	0.325493	0.000587	0.693768	0.242993	0.527168	0.669144
OG0005338	4453	1	5	2	0	1	1	1	0.0392	0.487153	0.022199	0.103562	0.242993	0.527168	0.669144
OG0005346	4457	0	6	1	0	1	1	1	0.0074	0.325493	0.000587	0.693768	0.242993	0.527168	0.669144
OG0005365	4468	5	1	2	0	1	1	1	0.0392	0.022199	0.487153	0.103562	0.242993	0.527168	0.669144
OG0005367	4469	5	1	2	0	1	1	1	0.0392	0.022199	0.487153	0.103562	0.242993	0.527168	0.669144
OG0005368	4470	0	5	2	0	2	2	2	0.0169	0.134709	0.022199	0.783497	0.031859	0.552141	0.758042
OG0005375	4474	1	5	2	0	1	1	1	0.0392	0.487153	0.022199	0.103562	0.242993	0.527168	0.669144
OG0005382	4477	1	5	2	0	1	1	1	0.0392	0.487153	0.022199	0.103562	0.242993	0.527168	0.669144
OG0005386	4481	5	0	2	0	2	2	2	0.0169	0.022199	0.134709	0.783497	0.031859	0.552141	0.758042
OG0005387	4482	5	0	2	0	2	2	2	0.0169	0.022199	0.134709	0.783497	0.031859	0.552141	0.758042
OG0005388	4483	6	0	1	0	1	1	1	0.0074	0.000587	0.325493	0.693768	0.242993	0.527168	0.669144
OG0005390	4484	1	0	1	0	2	6	2	0.0097	0.728538	0.325493	0.433845	0.031859	0.552141	0.002124
OG0005392	4485	1	0	1	0	2	6	2	0.0097	0.728538	0.325493	0.433845	0.031859	0.552141	0.002124
OG0006752	5577	0	3	2	0	2	3	2	0.03725	0.134709	0.256806	0.783497	0.031859	0.552141	0.183233
OG0006754	5578	0	2	1	0	1	4	1	0.0322	0.325493	0.12247	0.693768	0.242993	0.527168	0.003133
OG0006769	5585	0	4	1	0	1	2	1	0.03745	0.325493	0.008482	0.693768	0.242993	0.527168	0.090026
OG0006779	5591	0	5	1	0	1	1	1	0.02025	0.325493	0.002232	0.693768	0.242993	0.527168	0.669144
OG0006787	5596	0	3	2	0	2	3	2	0.03725	0.134709	0.256806	0.783497	0.031859	0.552141	0.183233
OG0006793	5598	0	5	1	0	1	1	1	0.02025	0.325493	0.002232	0.693768	0.242993	0.527168	0.669144
OG0006799	5602	0	1	1	0	2	5	2	0.023	0.325493	0.728538	0.433845	0.031859	0.552141	0.009311
OG0006808	5604	0	5	1	0	1	1	1	0.02025	0.325493	0.002232	0.693768	0.242993	0.527168	0.669144
OG0006811	5605	0	5	1	0	1	1	1	0.02025	0.325493	0.002232	0.693768	0.242993	0.527168	0.669144
OG0006818	5610	0	5	1	0	1	1	1	0.02025	0.325493	0.002232	0.693768	0.242993	0.527168	0.669144
OG0006833	5620	0	1	1	0	2	5	2	0.023	0.325493	0.728538	0.433845	0.031859	0.552141	0.009311
OG0006856	5637	1	0	1	0	2	5	2	0.023	0.728538	0.325493	0.433845	0.031859	0.552141	0.009311
OG0006857	5638	2	0	1	0	1	4	1	0.0322	0.12247	0.325493	0.693768	0.242993	0.527168	0.003133
OG0006858	5639	1	0	1	0	2	5	2	0.023	0.728538	0.325493	0.433845	0.031859	0.552141	0.009311
OG0006859	5640	5	0	1	0	1	1	1	0.02025	0.002232	0.325493	0.693768	0.242993	0.527168	0.669144
OG0006860	5641	1	0	1	0	2	5	2	0.023	0.728538	0.325493	0.433845	0.031859	0.552141	0.009311
OG0006861	5642	1	0	1	0	2	5	2	0.023	0.728538	0.325493	0.433845	0.031859	0.552141	0.009311
OG0006862	5643	1	0	1	0	2	5	2	0.023	0.728538	0.325493	0.433845	0.031859	0.552141	0.009311
OG0006863	5644	5	0	1	0	1	1	1	0.02025	0.002232	0.325493	0.693768	0.242993	0.527168	0.669144
OG0006864	5645	1	0	1	0	2	5	2	0.023	0.728538	0.325493	0.433845	0.031859	0.552141	0.009311
OG0006865	5646	1	0	1	0	2	5	2	0.023	0.728538	0.325493	0.433845	0.031859	0.552141	0.009311
OG0006867	5647	3	0	2	0	2	3	2	0.03725	0.256806	0.134709	0.783497	0.031859	0.552141	0.183233
OG0006868	5648	1	0	1	0	2	5	2	0.023	0.728538	0.325493	0.433845	0.031859	0.552141	0.009311
OG0006869	5649	1	0	1	0	2	5	2	0.023	0.728538	0.325493	0.433845	0.031859	0.552141	0.009311
OG0006871	5650	5	0	1	0	1	1	1	0.02025	0.002232	0.325493	0.693768	0.242993	0.527168	0.669144
OG0006873	5651	1	0	1	0	2	5	2	0.023	0.728538	0.325493	0.433845	0.031859	0.552141	0.009311
OG0006874	5652	5	0	1	0	1	1	1	0.02025	0.002232	0.325493	0.693768	0.242993	0.527168	0.669144
OG0006875	5653	4	0	1	0	1	2	1	0.03745	0.008482	0.325493	0.693768	0.242993	0.527168	0.090026
OG0008777	7103	0	4	1	0	1	1	1	0.046	0.325493	0.008482	0.693768	0.242993	0.527168	0.669144
OG0008782	7106	0	4	1	0	1	1	1	0.046	0.325493	0.008482	0.693768	0.242993	0.527168	0.669144
OG0008789	7108	0	4	1	0	1	1	1	0.046	0.325493	0.008482	0.693768	0.242993	0.527168	0.669144
OG0008798	7114	0	4	1	0	1	1	1	0.046	0.325493	0.008482	0.693768	0.242993	0.527168	0.669144
OG0008809	7118	0	4	1	0	1	1	1	0.046	0.325493	0.008482	0.693768	0.242993	0.527168	0.669144
OG0008822	7124	0	4	1	0	1	1	1	0.046	0.325493	0.008482	0.693768	0.242993	0.527168	0.669144
OG0008832	7129	0	4	1	0	1	1	1	0.046	0.325493	0.008482	0.693768	0.242993	0.527168	0.669144
OG0008837	7131	0	4	1	0	1	1	1	0.046	0.325493	0.008482	0.693768	0.242993	0.527168	0.669144
OG0008845	7136	0	4	1	0	1	1	1	0.046	0.325493	0.008482	0.693768	0.242993	0.527168	0.669144
OG0008867	7143	0	4	1	0	1	1	1	0.046	0.325493	0.008482	0.693768	0.242993	0.527168	0.669144
OG0008870	7144	0	4	1	0	1	1	1	0.046	0.325493	0.008482	0.693768	0.242993	0.527168	0.669144
OG0008878	7149	0	4	1	0	1	1	1	0.046	0.325493	0.008482	0.693768	0.242993	0.527168	0.669144
OG0008885	7153	0	4	1	0	1	1	1	0.046	0.325493	0.008482	0.693768	0.242993	0.527168	0.669144
OG0008902	7160	0	4	1	0	1	1	1	0.046	0.325493	0.008482	0.693768	0.242993	0.527168	0.669144
OG0008914	7165	0	4	1	0	1	1	1	0.046	0.325493	0.008482	0.693768	0.242993	0.527168	0.669144
OG0008917	7168	0	4	1	0	1	1	1	0.046	0.325493	0.008482	0.693768	0.242993	0.527168	0.669144
OG0008938	7174	0	4	1	0	1	1	1	0.046	0.325493	0.008482	0.693768	0.242993	0.527168	0.669144
OG0008948	7180	0	4	1	0	1	1	1	0.046	0.325493	0.008482	0.693768	0.242993	0.527168	0.669144
OG0008979	7199	4	0	1	0	1	1	1	0.046	0.008482	0.325493	0.693768	0.242993	0.527168	0.669144
OG0008981	7201	4	0	1	0	1	1	1	0.046	0.008482	0.325493	0.693768	0.242993	0.527168	0.669144
OG0008988	7207	4	0	1	0	1	1	1	0.046	0.008482	0.325493	0.693768	0.242993	0.527168	0.669144
